# Supplementary material for: APOBEC-induced mutations in human cancers are strongly enriched on the lagging DNA strand during replication
Source: HighWire-hosted journal article supplement (doi:10.1101/gr.197046.115), 2016-01-11
Supplement: TablesS1-S2.xlsx [file TablesS1-S2.xlsx]

## Sheet: Table 1
				Cancer type	Cnacer id	Number of mutations	Fraction of APOBEC3B sugnature mutations	rapo	late to early rt ratio (10 bin vs bin 1 ) for APOBEC3B signature mutations (only for cancers with more than 3000 mutations)	late to early rt ratio (10 bin vs bin 1 ) (only for cancers with more than 3000 mutations)
				CLL	001-0002-03TD	814	0.05405	0.99537
				CLL	003-0005-09TD	978	0.04192	0.83627
				CLL	012-02-1TD	822	0.07421	1.23410
				CLL	125	1624	0.04433	0.84513
				CLL	128	1544	0.04793	0.80412
				CLL	137	1810	0.04088	0.82948
				CLL	141	2977	0.05509	0.93174
				CLL	151	2231	0.03675	0.69170
				CLL	178	2858	0.04094	0.66170
				CLL	192	2674	0.04151	0.94919
				CLL	26	1704	0.05282	0.99981
				CLL	277	474	0.05696	1.00280
				CLL	282	1633	0.04960	0.70724
				CLL	294	471	0.03822	1.35732
				CLL	306	1534	0.04694	0.76896
				CLL	308	2068	0.04352	0.92164
				CLL	318	1152	0.04774	0.69474
				CLL	342	1733	0.04847	0.80395
				CLL	343	1509	0.04705	0.86607
				CLL	367	2336	0.04324	0.91393
				CLL	393	1849	0.03515	0.73189
				AML	400220	254	0.04331	0.55863
				Lymphoma B-cell	4101316	2009	0.05177	0.70517
				Lymphoma B-cell	4105105	3033	0.04418	0.85281	4.90946	4.96028
				Lymphoma B-cell	4108101	3065	0.05416	0.72597	3.65088	2.58348
				Lymphoma B-cell	4112512	1959	0.04849	0.87233
				Lymphoma B-cell	4116738	7243	0.13254	2.45266	3.23009	2.18489
				Lymphoma B-cell	4119027	2248	0.05383	0.93509
				Lymphoma B-cell	4121361	5657	0.05073	1.01590	2.98623	2.92967
				Lymphoma B-cell	4125240	1898	0.06270	0.97730
				Lymphoma B-cell	4133511	3392	0.04098	0.82159	4.69530	8.92851
				Lymphoma B-cell	4135350	12300	0.01829	1.18371	14.78759	5.24212
				Lymphoma B-cell	4142267	1441	0.04580	0.80115
				Lymphoma B-cell	4158726	3951	0.05340	0.95119	5.84768	4.39662
				Lymphoma B-cell	4159170	3142	0.04360	0.77481	5.46820	5.11529
				Lymphoma B-cell	4163639	35798	0.17286	3.76213	5.41815	3.74177
				Lymphoma B-cell	4175837	3883	0.04893	0.91451	7.22181	5.85934
				Lymphoma B-cell	4177856	3360	0.04256	0.99956	7.00376	9.48654
				Lymphoma B-cell	4182393	1450	0.06207	0.89583
				Lymphoma B-cell	4189200	3097	0.05166	1.09082	4.40130	3.34819
				Lymphoma B-cell	4189998	3312	0.04016	0.84000	6.73993	4.75361
				Lymphoma B-cell	4190495	4483	0.04841	1.01502	6.39715	8.63621
				Lymphoma B-cell	4193278	2559	0.03126	0.67028
				Lymphoma B-cell	4194218	1967	0.04575	0.77227
				Lymphoma B-cell	4194891	1620	0.04630	0.79757
				AML	426980	776	0.04381	0.44530
				AML	452198	105	0.04762	0.69123
				CLL	467	2537	0.02207	0.69329
				CLL	473	1753	0.03080	0.68559
				CLL	477	2839	0.03663	0.77717
				CLL	519	1373	0.04516	0.70449
				CLL	523	2896	0.03764	0.95506
				CLL	564	718	0.04039	0.85910
				AML	573988	136	0.05882	0.90488
				AML	758168	398	0.05025	0.73189
				AML	804168	577	0.04679	0.53323
				AML	869586	1042	0.07102	1.56054
				Pancreas	APGI_1839	4734	0.06506	1.62037	4.38505	4.88278
				Pancreas	APGI_1840	11161	0.11737	2.49605	4.26713	7.11365
				Pancreas	APGI_1956	4421	0.05293	1.09659	2.96086	3.79772
				Pancreas	APGI_1992	8411	0.07918	1.74268	3.14380	3.51912
				Pancreas	APGI_2000	7200	0.07028	1.51158	3.80933	3.88931
				Pancreas	APGI_2051	3704	0.08288	1.54333	2.61829	3.37756
				Pancreas	APGI_2057	14186	0.11173	1.96324	1.58211	1.30496
				Pancreas	APGI_2060	6055	0.07036	1.48469	3.80742	4.77427
				Pancreas	APGI_2119	3549	0.07072	1.36077	3.09827	2.32513
				Pancreas	APGI_2137	10115	0.14483	2.77862	2.18535	2.36343
				Pancreas	APGI_2150	988	0.09008	1.66519
				Pancreas	APGI_2157	6414	0.36171	10.07530	2.52466	2.08952
				Pancreas	APGI_2179	13572	0.10890	1.94289	1.62883	0.88484
				Pancreas	APGI_2202	3327	0.08326	1.61806	2.87329	2.79016
				Pancreas	APGI_2353	6914	0.06436	1.32300	3.84618	3.94165
				CLL	CLL4-ARTICLE	841	0.03686	0.80355
				Lymphoma B-cell	G1	5739	0.05489	0.81651	1.29584	1.61898
				Liver	HX10T	8782	0.06570	1.37137	2.63229	2.13232
				Liver	HX11T	8000	0.08725	1.82834	2.45214	1.80316
				Liver	HX12T	14039	0.07308	1.32423	2.68247	2.16528
				Liver	HX13T	20369	0.03466	0.76384	1.25497	1.89520
				Liver	HX14T	10114	0.06644	1.41834	2.99196	2.79016
				Liver	HX15T	7057	0.09140	1.88606	2.71515	2.39489
				Liver	HX16T	6146	0.10999	2.37260	2.36738	1.11876
				Liver	HX17T	20007	0.05593	1.33937	2.12701	2.33207
				Liver	HX18T	7082	0.07230	1.39854	3.24848	1.83897
				Liver	HX19T	11960	0.06973	1.33807	2.76184	1.95011
				Liver	HX20T	5267	0.06968	1.10163	2.65120	2.59436
				Liver	HX21T	13780	0.05668	0.96402	3.13044	2.13271
				Liver	HX22T	3332	0.08493	1.62638	2.88263	1.86011
				Liver	HX23T	3429	0.09886	1.75380	2.75062	1.86011
				Liver	HX25T	4268	0.09677	1.66298	2.87398	2.27346
				Liver	HX28T	8607	0.05275	1.00601	3.03769	3.14447
				Liver	HX30T	10538	0.06728	1.22435	3.36727	3.19234
				Liver	HX33T	14573	0.05092	1.24421	3.34761	2.05591
				Liver	HX35T	10704	0.06652	1.41176	3.20590	1.79247
				Liver	HX4T	6478	0.10358	2.07420	1.62172	0.95553
				Liver	HX5T	8421	0.07909	1.41046	2.76709	2.76281
				Liver	HX9T	7632	0.06905	1.35475	3.06197	2.07894
				Medulloblastoma	LFS_MB1	1664	0.05769	1.11111
				Medulloblastoma	LFS_MB2	1522	0.04534	0.70659
				Medulloblastoma	LFS_MB4	1195	0.05021	0.93903
				Lung Adeno	LU-A08-43	10837	0.14681	2.67687	1.76851	1.92722
				Lung Adeno	LUAD-2GUGK	42323	0.06956	1.34816	4.64758	3.50213
				Lung Adeno	LUAD-5V8LT	282564	0.04856	1.09161	4.59130	4.27039
				Lung Adeno	LUAD-AEIUF	29298	0.06424	1.32220	3.80144	2.34373
				Lung Adeno	LUAD-D02326	8189	0.09098	1.82648	1.56341	1.04166
				Lung Adeno	LUAD-E00934	106573	0.05605	1.08714	5.73733	5.78024
				Lung Adeno	LUAD-E01014	20695	0.11206	2.30366	2.98404	2.76087
				Lung Adeno	LUAD-E01278	42884	0.08838	1.91030	4.87308	4.87614
				Lung Adeno	LUAD-E01317	33443	0.14556	3.52244	4.00558	1.66355
				Lung Adeno	LUAD-FH5PJ	34118	0.05695	1.14737	4.94917	4.26439
				Lung Adeno	LUAD-QY22Z	66563	0.06694	1.34194	4.47619	3.48033
				Lung Adeno	LUAD-S00488	70656	0.05380	1.13739	3.90219	3.76201
				Lung Adeno	LUAD-S01302	120857	0.05468	1.11678	4.33134	4.10430
				Lung Adeno	LUAD-S01331	41249	0.05714	1.24712	4.30467	2.78427
				Lung Adeno	LUAD-S01341	13254	0.28625	5.92289	1.39227	1.11202
				Lung Adeno	LUAD-S01345	35820	0.53573	17.87159	0.86546	0.67991
				Lung Adeno	LUAD-S01346	77819	0.07938	1.51230	5.24062	2.92653
				Lung Adeno	LUAD-S01356	65502	0.05928	1.16262	3.89515	3.32226
				Lung Adeno	LUAD-S01381	26820	0.07144	1.38721	3.28385	3.03354
				Lung Adeno	LUAD-S01404	32442	0.05422	1.14735	4.68940	4.52701
				Lung Adeno	LUAD-S01405	46527	0.16476	3.56966	4.76902	2.50693
				Lung Adeno	LUAD-S01467	43440	0.08011	1.59186	3.99577	2.71721
				Lung Adeno	LUAD-S01478	75114	0.11364	2.51019	4.00854	1.54874
				Lung Adeno	LUAD-U6SJ7	28914	0.06170	1.32558	3.60788	2.93324
				Medulloblastoma	MB1	354	0.03955	0.59047
				Medulloblastoma	MB101	3169	0.05144	0.85213	2.22789	1.17807
				Medulloblastoma	MB102	1588	0.04219	0.77546
				Medulloblastoma	MB104	2089	0.04691	0.74349
				Medulloblastoma	MB106	340	0.05000	1.03179
				Medulloblastoma	MB107	1449	0.06349	1.21774
				Medulloblastoma	MB108	514	0.07004	1.07932
				Medulloblastoma	MB110	3254	0.07591	1.15534	3.68561	3.72021
				Medulloblastoma	MB112	1058	0.03875	0.77292
				Medulloblastoma	MB113	954	0.03564	0.76915
				Medulloblastoma	MB114	484	0.05579	0.94630
				Medulloblastoma	MB115	569	0.04745	0.77227
				Medulloblastoma	MB117	799	0.03504	0.80087
				Medulloblastoma	MB119	166	0.05422	0.65870
				Medulloblastoma	MB12	169	0.03550	0.53323
				Medulloblastoma	MB121	458	0.06114	0.74123
				Medulloblastoma	MB122	1004	0.04582	0.93063
				Medulloblastoma	MB124	1389	0.03888	0.87256
				Medulloblastoma	MB125	2642	0.06813	0.98227
				Medulloblastoma	MB126	2710	0.04022	0.70635
				Medulloblastoma	MB127	1458	0.04458	0.78518
				Medulloblastoma	MB128	8740	0.04805	0.97951	4.93383	3.18875
				Medulloblastoma	MB129	1159	0.05695	0.77837
				Medulloblastoma	MB130	827	0.05441	0.90306
				Medulloblastoma	MB131	1091	0.02933	0.53804
				Medulloblastoma	MB132	229	0.03930	0.54624
				Medulloblastoma	MB134	637	0.05338	0.92974
				Medulloblastoma	MB139	389	0.03856	0.65485
				Medulloblastoma	MB15	876	0.06507	0.92104
				Medulloblastoma	MB16	347	0.05187	0.81439
				Medulloblastoma	MB17	605	0.06116	1.02302
				Medulloblastoma	MB18	1046	0.05163	0.92672
				Medulloblastoma	MB19	595	0.05042	0.82948
				Medulloblastoma	MB2	348	0.06609	1.02203
				Medulloblastoma	MB20	743	0.04172	0.84771
				Medulloblastoma	MB21	268	0.04851	0.82948
				Medulloblastoma	MB23	1724	0.03886	0.69469
				Medulloblastoma	MB24	259	0.05405	0.60065
				Medulloblastoma	MB26	748	0.04011	0.75407
				Medulloblastoma	MB3	852	0.05516	1.05366
				Medulloblastoma	MB31	1403	0.05061	0.95502
				Medulloblastoma	MB32	519	0.05588	0.98855
				Medulloblastoma	MB34	2762	0.04815	0.90923
				Medulloblastoma	MB35	265	0.04151	0.73980
				Medulloblastoma	MB36	1188	0.04293	1.02347
				Medulloblastoma	MB38	655	0.06107	1.02616
				Medulloblastoma	MB39	195	0.02051	0.36866
				Medulloblastoma	MB40	105	0.03810	0.82948
				Medulloblastoma	MB45	1548	0.05103	0.78950
				Medulloblastoma	MB46	615	0.05854	1.04167
				Medulloblastoma	MB49	689	0.06821	1.20573
				Medulloblastoma	MB5	545	0.05321	0.72893
				Medulloblastoma	MB50	1023	0.06549	1.19946
				Medulloblastoma	MB51	459	0.06536	0.82948
				Medulloblastoma	MB518	1030	0.04175	0.71335
				Medulloblastoma	MB53	1476	0.05352	0.87761
				Medulloblastoma	MB56	2185	0.05126	0.86824
				Medulloblastoma	MB57	660	0.03636	0.54791
				Medulloblastoma	MB58	1599	0.06129	0.87721
				Medulloblastoma	MB59	1903	0.04834	0.97006
				Medulloblastoma	MB6	1031	0.06596	0.86333
				Medulloblastoma	MB60	1154	0.03553	0.68017
				Medulloblastoma	MB61	2420	0.04504	0.78848
				Medulloblastoma	MB612	285	0.05965	1.03179
				Medulloblastoma	MB63	1812	0.04691	0.78924
				Medulloblastoma	MB64	847	0.06494	0.90042
				Medulloblastoma	MB66	1747	0.05667	0.85838
				Medulloblastoma	MB67	895	0.05251	0.99962
				Medulloblastoma	MB69	1676	0.04654	0.80205
				Medulloblastoma	MB7	677	0.06204	1.00494
				Medulloblastoma	MB70	1538	0.05202	0.89673
				Medulloblastoma	MB74	2022	0.05292	0.83207
				Medulloblastoma	MB75	1730	0.05491	0.81799
				Medulloblastoma	MB77	1421	0.04645	0.74315
				Medulloblastoma	MB78	2771	0.04800	0.78988
				Medulloblastoma	MB79	1556	0.04692	0.80736
				Medulloblastoma	MB8	703	0.05121	0.71098
				Medulloblastoma	MB800	928	0.05819	1.01034
				Medulloblastoma	MB81	3473	0.05500	0.78431	1.90444	3.12836
				Medulloblastoma	MB82	1483	0.04585	0.89531
				Medulloblastoma	MB83	706	0.07224	1.17509
				Medulloblastoma	MB84	991	0.05853	1.06910
				Medulloblastoma	MB85	171	0.03509	0.78582
				Medulloblastoma	MB86	395	0.05570	0.82948
				Medulloblastoma	MB88	248	0.04032	0.57870
				Medulloblastoma	MB89	501	0.05389	0.79985
				Medulloblastoma	MB9	476	0.03571	0.76915
				Medulloblastoma	MB90	271	0.03690	0.73189
				Medulloblastoma	MB91	889	0.06187	0.88299
				Medulloblastoma	MB92	1586	0.04035	0.60325
				Medulloblastoma	MB94	1896	0.05749	0.97218
				Medulloblastoma	MB95	217	0.04608	0.77763
				Medulloblastoma	MB96	313	0.04473	0.99537
				Medulloblastoma	MB98	836	0.05024	0.68759
				Medulloblastoma	MB99	636	0.04245	0.73030
				Pilocytic Astrocytoma	PA105	257	0.05058	0.78901
				Pilocytic Astrocytoma	PA109	109	0.06422	1.45158
				Pilocytic Astrocytoma	PA11	285	0.03860	0.60828
				Pilocytic Astrocytoma	PA116	179	0.02793	0.56555
				Pilocytic Astrocytoma	PA117	215	0.06047	1.29398
				Pilocytic Astrocytoma	PA12	138	0.07246	1.77745
				Pilocytic Astrocytoma	PA131	250	0.02400	0.48163
				Pilocytic Astrocytoma	PA136	190	0.05789	1.71079
				Pilocytic Astrocytoma	PA143	162	0.06173	0.95709
				Pilocytic Astrocytoma	PA166	122	0.04098	0.73189
				Pilocytic Astrocytoma	PA20	190	0.01579	0.24884
				Pilocytic Astrocytoma	PA21	130	0.07692	1.30970
				Pilocytic Astrocytoma	PA22	245	0.07755	0.62211
				Pilocytic Astrocytoma	PA36	251	0.04781	0.99537
				Pilocytic Astrocytoma	PA43	172	0.05814	0.95709
				Pilocytic Astrocytoma	PA46	140	0.03571	0.44436
				Pilocytic Astrocytoma	PA58	174	0.06897	1.35732
				Pilocytic Astrocytoma	PA63	225	0.07556	1.28192
				Pilocytic Astrocytoma	PA65	734	0.05313	0.37041
				Pilocytic Astrocytoma	PA69	219	0.03196	0.56190
				Pilocytic Astrocytoma	PA73	292	0.05479	0.92593
				Pilocytic Astrocytoma	PA75	397	0.05038	0.70097
				Pilocytic Astrocytoma	PA82	119	0.02521	0.37326
				Pilocytic Astrocytoma	PA83	141	0.02128	0.41474
				Pilocytic Astrocytoma	PA84	167	0.02395	0.47399
				Pilocytic Astrocytoma	PA93	436	0.04817	0.55007
				Breast	PD3851a	1397	0.08017	1.47462
				Breast	PD3890a	5247	0.16447	2.61892	1.85202	1.89274
				Breast	PD3904a	4909	0.14993	2.23351	1.50649	1.68062
				Breast	PD3905a	3925	0.15516	2.68697	1.82386	1.21380
				Breast	PD3945a	9161	0.10392	1.76002	2.21135	1.45241
				Breast	PD3989a	1852	0.12635	2.63480
				Breast	PD4005a	5458	0.30835	6.37446	1.25581	0.97317
				Breast	PD4006a	8172	0.07881	1.14713	1.96912	1.43937
				ALL	PD4020a	7082	0.69670	34.39186	1.81458	1.68507
				Breast	PD4069a	1880	0.07713	1.38246
				Breast	PD4072a	24158	0.74327	41.44914	1.61911	1.52191
				Breast	PD4080a	1603	0.29195	7.32442
				Breast	PD4085a	2307	0.08496	1.63121
				Breast	PD4086a	1837	0.27273	6.11128
				Breast	PD4088a	1475	0.10712	1.85458
				Breast	PD4103a	4339	0.15395	2.87590	2.68099	4.01916
				Breast	PD4107a	8775	0.08011	1.27226	2.30877	1.37719
				Breast	PD4109a	8385	0.19046	3.67284	1.61485	1.30923
				Breast	PD4115a	8898	0.08541	1.40089	1.68550	1.45922
				Breast	PD4116a	7269	0.14335	2.40310	1.81306	1.16501
				Breast	PD4120a	57421	0.71918	38.61783	0.99925	1.05183
				Breast	PD4192a	3153	0.18807	3.48028	0.86536	0.62004
				Breast	PD4194a	1116	0.20699	3.91038
				Breast	PD4198a	3846	0.15185	3.17301	2.65594	1.70870
				Breast	PD4199a	5817	0.53705	18.50915	0.85124	0.70970
				Breast	PD4224a	7162	0.62064	26.58907	1.46395	1.31693
				Breast	PD4225a	1864	0.07082	1.26335
				Breast	PD4248a	1899	0.11743	2.04767
				Breast	PD4255a	4208	0.06298	1.17967	2.95443	1.46151
				Breast	PD4261a	1772	0.06772	1.10189
				Breast	PD4266a	2450	0.35061	8.55023
				Breast	PD4267a	2246	0.21149	4.32968
				Breast	PD4315a	3511	0.20963	4.23954	1.84228	2.71266
				Breast	PD4604a	7957	0.09803	1.67614	2.11595	1.17268
				Breast	PD4605a	2303	0.08684	1.52197
				Breast	PD4606a	1212	0.06931	1.25166
				Breast	PD4607a	23090	0.72620	39.85284	1.32808	1.31068
				Breast	PD4608a	2072	0.13224	2.41783
				Breast	PD4613a	1811	0.38929	9.13719
				Breast	PD4826a	3497	0.21132	5.55573	1.43077	1.62759
				Breast	PD4833a	6455	0.10658	1.58522	1.22021	1.39508
				Breast	PD4836a	4074	0.11046	1.67633	1.47945	1.68878
				Breast	PD4841a	6385	0.09319	1.61816	2.30321	1.24627
				Breast	PD4847a	10911	0.06315	1.22641	2.17709	2.09262
				Breast	PD4951a	2719	0.11769	2.14058
				Breast	PD4952a	11395	0.12953	2.03148	1.48434	1.21571
				Breast	PD4953a	6923	0.09880	1.49831	1.60090	1.05883
				Breast	PD4954a	5026	0.12117	1.81058	1.45691	1.17917
				Breast	PD4955a	5815	0.11522	1.85044	1.29178	1.05688
				Breast	PD4957a	2730	0.13590	2.35512
				Breast	PD4958a	7833	0.13660	2.37098	1.48499	1.11037
				Breast	PD4959a	4064	0.06890	1.14599	1.35985	1.86011
				Breast	PD4962a	4986	0.38528	11.92086	1.32947	1.18556
				Breast	PD4963a	1335	0.05243	0.95186
				Breast	PD4965a	2541	0.07399	1.31781
				Breast	PD4966a	951	0.07045	1.29244
				Breast	PD4967a	3274	0.32346	7.38163	1.67574	1.08949
				Breast	PD4968a	3844	0.18158	3.71137	2.11542	1.73491
				Breast	PD4970a	1944	0.08488	1.47165
				Breast	PD4971a	2263	0.08087	1.40118
				Breast	PD4972a	963	0.06438	1.08650
				Breast	PD4975a	6531	0.09554	1.41290	1.30710	1.50077
				Breast	PD4976a	5277	0.09665	1.82342	2.45118	2.99235
				Breast	PD4980a	3627	0.08078	1.43808	1.65177	1.53459
				Breast	PD4981a	1672	0.05622	0.97059
				Breast	PD4982a	1434	0.06137	1.14053
				Breast	PD4983a	1467	0.05862	0.84922
				Breast	PD4985a	1650	0.06727	1.12741
				Breast	PD4986a	1652	0.05448	0.79418
				Breast	PD5928a	6029	0.08841	1.36735	1.92818	1.55921
				Breast	PD5934a	11315	0.07813	1.18204	1.60547	1.32462
				Breast	PD5935a	9946	0.13563	2.28827	1.07705	0.91757
				Breast	PD5936a	2309	0.09311	1.81360
				Breast	PD5942a	5683	0.10083	1.50250	1.52249	0.91552
				Breast	PD5944a	2617	0.06955	1.36826
				Breast	PD5947a	1439	0.13482	2.29883
				Breast	PD5951a	3658	0.08502	1.82524	0.92408	1.99961
				Breast	PD5956a	4002	0.07021	1.31685	1.71897	2.62603
				Breast	PD6018a	2545	0.06876	1.17696
				Breast	PD6041a	1441	0.05899	1.12509
				Breast	PD6042a	6176	0.19220	3.62870	1.46888	1.00039
				Breast	PD6043a	21029	0.46317	12.68967	1.61722	1.08525
				Breast	PD6044a	2172	0.06354	1.07988
				Breast	PD6045a	1872	0.23611	5.18813
				Breast	PD6046a	2974	0.07599	1.36833
				Breast	PD6049a	6893	0.13013	2.08026	1.67797	1.13390
				Breast	PD6409a	5981	0.14412	2.57815	1.61450	1.15955
				Breast	PD6410a	6603	0.12858	2.18930	1.81206	1.28679
				Breast	PD6411a	7060	0.11530	1.87380	1.21523	1.21507
				Breast	PD6413a	4451	0.17973	3.14991	1.40784	1.05243
				Breast	PD6417a	1300	0.07846	1.41799
				Breast	PD6418a	1756	0.05638	0.94752
				Breast	PD6422a	4383	0.08784	1.48075	1.67774	1.44319
				Breast	PD6466b	1373	0.07502	1.58215
				Breast	PD6719a	4376	0.07290	1.02295	1.33698	0.68647
				Breast	PD6720a	1701	0.09171	1.59751
				Breast	PD6721a	1834	0.08451	1.43385
				Breast	PD6722a	10522	0.47909	15.11344	0.80565	0.70627
				Breast	PD7199a	955	0.05236	0.97204
				Breast	PD7201a	1350	0.08074	1.40538
				Breast	PD7207a	2279	0.11277	1.71455
				Breast	PD7208a	2042	0.21058	4.69308
				Breast	PD7209a	1383	0.06941	1.13217
				Breast	PD7210a	1150	0.04609	0.81917
				Breast	PD7212a	1793	0.08143	1.52651
				Breast	PD7214a	1635	0.08502	1.43523
				Breast	PD7215a	6499	0.26127	5.66400	1.09638	1.18370
				Breast	PD7216a	1315	0.05323	1.18496
				Breast	PD7217a	9365	0.16882	3.36832	1.20451	0.77853
				Breast	PD7218a	1647	0.05464	1.23054
				Breast	PD7219a	11334	0.60279	29.11118	1.00832	1.13255
				Breast	PD7221a	1707	0.22906	4.63321
				Breast	PD7321a	5966	0.17063	2.96977	1.16892	1.02035
				Breast	PD7404a	11556	0.19315	3.87050	1.96426	1.84710
				Breast	PD7409a	6859	0.10147	2.25514	1.74992	2.25587
				Breast	PD7431a	3598	0.30267	7.85477	1.25545	0.94884
				Breast	PD7433a	1914	0.07419	1.42482
				Breast	PD8618a	1228	0.07248	1.37559
				Breast	PD8622a	1584	0.08018	1.38004
				Breast	PD8623a	1584	0.11048	2.04448
				Liver	RK001_C01	18646	0.06291	1.11965	5.02037	3.43520
				Liver	RK002_C01	12164	0.05368	1.18264	4.31039	3.43603
				Liver	RK003_C01	6530	0.04977	0.94589	3.67247	2.79016
				Liver	RK004_C01	14699	0.06130	1.09798	4.02210	2.89958
				Liver	RK005_C01	2011	0.05619	1.14306
				Liver	RK006_C01	16427	0.06337	1.12189	6.22126	6.83108
				Liver	RK006_C02	17922	0.05368	1.11033	6.44700	6.38209
				Liver	RK007_C01	10553	0.05780	1.24015	3.51824	3.84022
				Liver	RK010_C01	6479	0.05541	1.09345	4.25788	4.03023
				Liver	RK012_C01	6613	0.04552	0.97528	4.03025	3.00900
				Liver	RK015_C01	12226	0.06053	1.29496	5.44692	3.50138
				Liver	RK016_C01	6989	0.05652	1.15639	4.40789	4.46426
				Liver	RK018_C01	1144	0.06294	1.42196
				Liver	RK019_C01	15144	0.04893	0.91601	6.46383	3.54426
				Liver	RK020_C01	4844	0.04913	1.16584	3.59385	3.29096
				Liver	RK021_C01	15296	0.07185	1.36398	4.69866	4.46830
				Liver	RK022_C01	11211	0.08144	1.52889	3.52506	3.52555
				Liver	RK023_C01	18355	0.07104	1.36916	4.05771	4.12382
				Liver	RK024_C01	4495	0.07586	1.16081	4.26610	3.39196
				Liver	RK025_C01	7522	0.06674	1.24297	5.31646	4.92928
				Liver	RK026_C01	5614	0.06965	1.16524	3.48893	5.64232
				Liver	RK027_C01	21656	0.04932	1.12042	3.48165	2.15241
				Liver	RK029_C01	6808	0.05920	1.33002	4.20387	3.31584
				Liver	RK031_C01	6335	0.06346	1.19373	3.07601	3.05589
				Liver	RK032_C01	10406	0.05218	1.01672	3.30773	3.31331
				Liver	RK033_C01	3487	0.06825	1.15899	3.52855	2.22179
				Liver	RK034_C01	4467	0.07052	1.32408	4.94161	6.51037
				Liver	RK035_C01	24319	0.05259	1.12264	4.31675	3.47402
				Liver	RK036_C01	4203	0.04925	0.95390	2.92292	2.19227
				Liver	RK037_C01	4669	0.06875	1.13949	3.19212	2.43585
				Liver	RK041_C01	18936	0.05424	1.06307	4.56756	4.56572
				Liver	RK042_C01	7857	0.07038	1.25214	2.97811	3.38805
				Liver	RK046_C01	8287	0.04079	1.06873	4.58688	3.35853
				Liver	RK046_C02	10566	0.04969	1.19199	4.52421	4.26274
				Liver	RK047_C01	7330	0.05239	1.18262	3.85587	3.89460
				Liver	RK048_C01	13286	0.04140	0.91732	4.60777	5.48242
				Liver	RK049_C01	2004	0.04691	0.82363
				Liver	RK050_C01	8210	0.05871	1.16675	4.50202	4.42882
				Liver	RK051_C01	11093	0.06247	1.27456	3.35459	3.89460
				Liver	RK054_C01	5825	0.05494	1.03955	4.15726	5.11529
				Liver	RK055_C01	1735	0.06167	1.04416
				Liver	RK056_C01	16161	0.04208	0.80886	2.90044	3.46186
				Liver	RK063_C01	5629	0.05667	1.14547	4.24918	3.42957
				Liver	RK067_C01	13192	0.05071	0.84720	4.56592	3.54583
				Liver	RK068_C01	2022	0.07221	1.04100
				Liver	RK069_C01	4188	0.06686	1.06213	3.06634	4.18524
				Liver	RK075_C01	8174	0.06631	1.23964	3.65424	2.98744
				Liver	RK079_C01	11846	0.04516	0.94958	4.71335	2.76432
				Liver	RK083_C01	7685	0.05895	1.16212	3.17731	3.80879
				Liver	RK084_C01	8053	0.05278	1.10741	3.83312	3.19938
				Liver	RK086_C01	13955	0.04973	1.10845	3.91654	4.68348
				Liver	RK089_C01	9154	0.05233	1.10571	3.93937	3.83647
				Liver	RK092_C01	10326	0.04997	1.09093	5.13200	4.78977
				Liver	RK098_C01	5895	0.06497	1.35379	3.46686	2.15905
				Liver	RK099_C01	6387	0.06873	1.30360	3.46763	3.76672
				Liver	RK100_C01	7970	0.06236	1.33702	4.24428	3.88931
				Liver	RK106_C01	11412	0.05950	1.29673	4.00054	4.51740
				Liver	RK107_C01	10715	0.04302	1.06614	3.47402	2.38326
				Liver	RK108_C01	6381	0.06801	1.15259	3.15762	4.75361
				Liver	RK109_C01	5120	0.06484	1.15064	3.79573	3.47220
				Liver	RK126_C01	17273	0.06426	1.38177	1.32207	1.81967
				Liver	RK130_C01	4543	0.06824	1.24221	3.09877	2.39157
				Liver	RK133_C01	5435	0.07378	1.57143	4.00609	4.59214
				Liver	RK137_C01	7389	0.05725	1.16567	3.78270	3.18875
				Liver	RK138_C01	2394	0.11111	2.15610
				Liver	RK141_C01	4640	0.05625	1.09156	5.47057	6.77610
				Pilocytic Astrocytoma	SJLGG008	134	0.08209	1.19012
				Pilocytic Astrocytoma	SJLGG034	186	0.04301	1.10597
				Pilocytic Astrocytoma	SJLGG042	107	0.03738	0.76567

## Sheet: Table 2
		Cancer type	Cnacer id	Number of mutations	Fraction of APOBEC3B sugnature mutations	rapo
		OV	TCGA-04-1347-01A-01W-0488-09	121	0.0743801652892562	1.06646827386084
		LUAD	TCGA-05-4244-01A-01D-1105-08	229	0.0480349344978166	0.882989861153603
		LUAD	TCGA-05-4249-01A-01D-1105-08	351	0.0740740740740741	2.31068126003183
		LUAD	TCGA-05-4250-01A-01D-1105-08	366	0.0983606557377049	2.29700858985413
		LUAD	TCGA-05-4382-01A-01D-1265-08	345	0.0840579710144927	2.57729832849704
		LUAD	TCGA-05-4382-01A-01D-1931-08	1694	0.0867768595041322	2.19041088583395
		LUAD	TCGA-05-4384-01A-01D-1753-08	150	0.08	2.48842597234197
		LUAD	TCGA-05-4389-01A-01D-1265-08	286	0.230769230769231	5.13237856795531
		LUAD	TCGA-05-4390-01A-02D-1753-08	525	0.0285714285714286	0.592482374367136
		LUAD	TCGA-05-4395-01A-01D-1265-08	282	0.219858156028369	7.01283683114555
		LUAD	TCGA-05-4396-01A-21D-1855-08	523	0.0267686424474187	0.295236979769386
		LUAD	TCGA-05-4397-01A-01D-1265-08	864	0.131944444444444	2.72769770045178
		LUAD	TCGA-05-4398-01A-01D-1265-08	839	0.0977353992848629	2.1940960186241
		LUAD	TCGA-05-4402-01A-01D-1265-08	168	0.44047619047619	11.5089701220816
		LUAD	TCGA-05-4403-01A-01D-1265-08	137	0.0583941605839416	1.24421298617099
		LUAD	TCGA-05-4405-01A-21D-1855-08	428	0.0654205607476635	1.5146940701212
		LUAD	TCGA-05-4410-01A-21D-1855-08	1227	0.0969845150774246	1.96107742191188
		LUAD	TCGA-05-4415-01A-22D-1855-08	218	0.036697247706422	0.622106493085493
		LUAD	TCGA-05-4417-01A-22D-1855-08	306	0.042483660130719	0.924272504012732
		LUAD	TCGA-05-4418-01A-01D-1265-08	292	0.0616438356164384	1.24421298617099
		LUAD	TCGA-05-4420-01A-01D-1265-08	330	0.0484848484848485	0.847123735265352
		LUAD	TCGA-05-4424-01A-22D-1855-08	826	0.127118644067797	4.14737662056995
		LUAD	TCGA-05-4427-01A-21D-1855-08	1070	0.0719626168224299	1.38846956427777
		LUAD	TCGA-05-4430-01A-02D-1265-08	283	0.0424028268551237	0.995370388936788
		LUAD	TCGA-05-4432-01A-01D-1265-08	729	0.056241426611797	0.971671093962103
		LUAD	TCGA-05-5420-01A-01D-1625-08	110	0.0545454545454545	1.24421298617099
		LUAD	TCGA-05-5423-01A-01D-1625-08	156	0.0897435897435897	2.90316363439897
		LUAD	TCGA-05-5425-01A-02D-1625-08	666	0.0660660660660661	1.3517375652228
		LUAD	TCGA-05-5428-01A-01D-1625-08	405	0.22716049382716	6.54100541301318
		LUAD	TCGA-05-5715-01A-01D-1625-08	108	0.416666666666667	9.33159739628239
		GBM	TCGA-06-0743-01A-01D-1492-08	103	0.0388349514563107	0.622106493085493
		GBM	TCGA-06-5858-01A-01D-1696-08	225	0.00888888888888889	0.995370388936788
		OV	TCGA-09-2049-01D-01W-0799-08	105	0.0857142857142857	1.39973960944236
		OV	TCGA-10-0930-01A-02W-0421-09	152	0.0855263157894737	0.951456989424871
		OV	TCGA-13-0760-01A-01W-0372-09	176	0.0511363636363636	0.861378221195298
		OV	TCGA-13-0885-01A-02W-0421-09	155	0.0645161290322581	0.731889991865286
		OV	TCGA-13-0887-01A-01W-0421-09	109	0.0825688073394495	2.23958337510777
		OV	TCGA-13-0920-01A-01W-0421-09	111	0.0630630630630631	1.0246459886114
		OV	TCGA-13-0923-01A-01W-0420-08	106	0.0943396226415094	1.65895064822798
		OV	TCGA-13-1488-01A-01W-0549-09	118	0.161016949152542	2.1490951579317
		OV	TCGA-13-1497-01A-01W-0549-09	127	0.078740157480315	0.95708691243922
		OV	TCGA-13-1498-01A-01W-0549-09	101	0.138613861386139	1.93544242293264
		LUAD	TCGA-17-Z000-01A-01W-0746-08	152	0.190789473684211	4.00913073321762
		LUAD	TCGA-17-Z001-01A-01W-0746-08	220	0.0545454545454545	0.995370388936788
		LUAD	TCGA-17-Z003-01A-01W-0746-08	321	0.0841121495327103	1.63871954276179
		LUAD	TCGA-17-Z005-01A-01W-0746-08	149	0.0671140939597315	1.1311027147009
		LUAD	TCGA-17-Z010-01A-01W-0746-08	298	0.0973154362416107	3.79812385252196
		LUAD	TCGA-17-Z011-01A-01W-0746-08	136	0.0735294117647059	1.30969788017998
		LUAD	TCGA-17-Z014-01A-01W-0746-08	463	0.0777537796976242	1.79166670008622
		LUAD	TCGA-17-Z015-01A-01W-0746-08	529	0.0378071833648393	0.975853322487047
		LUAD	TCGA-17-Z016-01A-01W-0746-08	326	0.0214723926380368	0.458394258062995
		LUAD	TCGA-17-Z017-01A-01W-0746-08	201	0.0447761194029851	0.722446250034766
		LUAD	TCGA-17-Z018-01A-01W-0746-08	252	0.0515873015873016	1.47043352911116
		LUAD	TCGA-17-Z020-01A-01W-0746-08	160	0.1875	3.24577300740257
		LUAD	TCGA-17-Z021-01A-01W-0746-08	280	0.0678571428571429	1.24421298617099
		LUAD	TCGA-17-Z022-01A-01W-0746-08	1267	0.134175217048145	3.41155173627528
		LUAD	TCGA-17-Z023-01A-01W-0746-08	433	0.103926096997691	2.03598488646161
		LUAD	TCGA-17-Z025-01A-01W-0746-08	281	0.0249110320284698	0.5123229943057
		LUAD	TCGA-17-Z026-01A-01W-0746-08	1174	0.362010221465077	11.0164691483889
		LUAD	TCGA-17-Z028-01A-01W-0746-08	537	0.0986964618249535	1.71281268226136
		LUAD	TCGA-17-Z030-01A-01W-0746-08	653	0.0535987748851455	1.14598564515749
		LUAD	TCGA-17-Z031-01A-01W-0746-08	2522	0.0440126883425853	1.19573715554095
		LUAD	TCGA-17-Z032-01A-01W-0746-08	156	0.173076923076923	3.19940482158253
		LUAD	TCGA-17-Z033-01A-01W-0746-08	195	0.194871794871795	3.26069610168948
		LUAD	TCGA-17-Z037-01A-01W-0746-08	150	0.0933333333333333	2.48842597234197
		LUAD	TCGA-17-Z041-01A-01W-0746-08	150	0.0866666666666667	1.61747688202228
		LUAD	TCGA-17-Z042-01A-01W-0746-08	498	0.0401606425702811	0.777633116356866
		LUAD	TCGA-17-Z043-01A-01W-0746-08	225	0.106666666666667	2.98611116681036
		LUAD	TCGA-17-Z044-01A-01W-0746-08	136	0.0514705882352941	0.916788516125989
		LUAD	TCGA-17-Z045-01A-01W-0746-08	650	0.0507692307692308	1.02647571359106
		LUAD	TCGA-17-Z049-01A-01W-0746-08	649	0.0662557781201849	1.42669755747606
		LUAD	TCGA-17-Z050-01A-01W-0747-08	253	0.118577075098814	2.48842597234197
		LUAD	TCGA-17-Z051-01A-01W-0747-08	243	0.0823045267489712	1.42195769848113
		LUAD	TCGA-17-Z052-01A-01W-0747-08	162	0.0617283950617284	1.38245887352332
		LUAD	TCGA-17-Z053-01A-01W-0747-08	397	0.0957178841309824	1.92979973365296
		LUAD	TCGA-17-Z055-01A-01W-0747-08	1153	0.0555073720728534	1.12154410021047
		LUAD	TCGA-17-Z056-01A-01W-0747-08	700	0.154285714285714	2.88978500013906
		LUAD	TCGA-17-Z057-01A-01W-0747-08	463	0.321814254859611	8.62268534602218
		LUAD	TCGA-17-Z058-01A-01W-0747-08	332	0.0662650602409639	1.40372747157752
		LUAD	TCGA-17-Z059-01A-01W-0747-08	184	0.173913043478261	3.46215787456274
		LUAD	TCGA-17-Z060-01A-01W-0747-08	346	0.0520231213872832	1.24421298617099
		LUAD	TCGA-17-Z061-01A-01W-0747-08	181	0.0773480662983425	1.33992167741491
		LUAD	TCGA-17-Z062-01A-01W-0747-08	538	0.0520446096654275	1.22238468816799
		LUSC	TCGA-18-3406-01A-01D-0983-08	287	0.184668989547038	4.25440569464918
		LUSC	TCGA-18-3407-01A-01D-0983-08	157	0.0127388535031847	0.331790129645596
		LUSC	TCGA-18-3409-01A-01D-0983-08	3520	0.145738636363636	1.87454115097126
		LUSC	TCGA-18-3410-01A-01D-0983-08	287	0.191637630662021	4.88797958852887
		LUSC	TCGA-18-3411-01A-01D-0983-08	402	0.0671641791044776	1.52698866484621
		LUSC	TCGA-18-3412-01A-01D-0983-08	184	0.0815217391304348	1.77744712310141
		LUSC	TCGA-18-3414-01A-01D-0983-08	366	0.144808743169399	3.47069938247696
		LUSC	TCGA-18-3415-01A-01D-0983-08	191	0.193717277486911	5.11509783203627
		LUSC	TCGA-18-3416-01A-01D-0983-08	467	0.0706638115631692	2.10559120736628
		LUSC	TCGA-18-3417-01A-01D-1441-08	307	0.0749185667752443	1.68334698129016
		LUSC	TCGA-18-3419-01A-01D-0983-08	415	0.146987951807229	3.61414248363953
		LUSC	TCGA-18-3421-01A-01D-0983-08	422	0.0971563981042654	1.88936046048187
		LUSC	TCGA-18-4083-01A-01D-1352-08	330	0.109090909090909	1.7227564423906
		LUSC	TCGA-18-4086-01A-01D-1352-08	180	0.1	2.35745618432397
		LUSC	TCGA-18-4721-01A-01D-1441-08	188	0.0478723404255319	0.799851205395634
		LUSC	TCGA-18-5592-01A-01D-1632-08	297	0.0774410774410774	1.97357921944363
		LUSC	TCGA-18-5595-01A-01D-1632-08	259	0.393822393822394	11.0356282251687
		GBM	TCGA-19-1390-01A-01D-1495-08	111	0.0810810810810811	1.49305558340518
		GBM	TCGA-19-1790-01B-01D-1353-08	164	0.0426829268292683	0.580632726879793
		LUSC	TCGA-21-1070-01A-01D-1521-08	472	0.0593220338983051	1.03993921232202
		LUSC	TCGA-21-1071-01A-01D-1521-08	194	0.154639175257732	3.92909364053995
		LUSC	TCGA-21-1076-01A-02D-1521-08	306	0.0980392156862745	2.76491774704663
		LUSC	TCGA-21-1077-01A-01D-1521-08	226	0.15929203539823	4.07196977292323
		LUSC	TCGA-21-1081-01A-01D-1521-08	185	0.0540540540540541	1.30969788017998
		LUSC	TCGA-21-5782-01A-01D-1632-08	379	0.213720316622691	4.47916675021555
		LUSC	TCGA-21-5784-01A-01D-1632-08	211	0.0900473933649289	1.57600311581658
		LUSC	TCGA-21-5786-01A-01D-1632-08	390	0.0358974358974359	0.580632726879793
		LUSC	TCGA-21-5787-01A-01D-1632-08	423	0.0851063829787234	1.90602840434704
		LUSC	TCGA-22-0944-01A-01D-1521-08	131	0.129770992366412	4.70036016997928
		LUSC	TCGA-22-1002-01A-01D-1521-08	241	0.045643153526971	0.912422856525389
		LUSC	TCGA-22-1011-01A-01D-1521-08	110	0.418181818181818	12.7186216364145
		LUSC	TCGA-22-1012-01A-01D-1521-08	271	0.0922509225092251	2.14519480374308
		LUSC	TCGA-22-1016-01A-01D-1521-08	348	0.0718390804597701	1.32363083635211
		LUSC	TCGA-22-4591-01A-01D-1267-08	265	0.0490566037735849	0.980289019407443
		LUSC	TCGA-22-4593-01A-21D-1817-08	201	0.119402985074627	3.31790129645596
		LUSC	TCGA-22-4595-01A-01D-1267-08	353	0.107648725212465	2.10133748775544
		LUSC	TCGA-22-4599-01A-01D-1441-08	389	0.038560411311054	0.592482374367136
		LUSC	TCGA-22-4601-01A-01D-1441-08	184	0.141304347826087	2.02184610252785
		LUSC	TCGA-22-4604-01A-01D-1267-08	266	0.0864661654135338	1.6352513532533
		LUSC	TCGA-22-4613-01A-01D-1441-08	614	0.0586319218241042	1.16341993512092
		LUSC	TCGA-22-5471-01A-01D-1632-08	274	0.124087591240876	2.91746493309059
		LUSC	TCGA-22-5472-01A-01D-1632-08	454	0.0374449339207048	1.5108300546362
		LUSC	TCGA-22-5473-01A-01D-1632-08	864	0.239583333333333	6.35931081820726
		LUSC	TCGA-22-5474-01A-01D-1632-08	104	0.278846153846154	6.01369609982643
		LUSC	TCGA-22-5477-01A-01D-1632-08	194	0.381443298969072	8.37016008878663
		LUSC	TCGA-22-5478-01A-01D-1632-08	193	0.0362694300518135	0.622106493085493
		LUSC	TCGA-22-5480-01A-01D-1632-08	162	0.0617283950617284	1.08192433580086
		LUSC	TCGA-22-5482-01A-01D-1632-08	178	0.0955056179775281	2.11516207649068
		LUSC	TCGA-22-5485-01A-01D-1632-08	210	0.0333333333333333	0.580632726879793
		LUSC	TCGA-22-5489-01A-01D-1632-08	267	0.119850187265918	3.0626781198055
		LUSC	TCGA-22-5491-01A-01D-1632-08	364	0.282967032967033	8.2679959726201
		LUSC	TCGA-22-5492-01A-01D-1632-08	225	0.0666666666666667	1.1311027147009
		OV	TCGA-23-1022-01A-02W-0488-09	188	0.0904255319148936	1.11324319815299
		OV	TCGA-23-1124-01A-01W-0488-09	152	0.157894736842105	2.29700858985413
		OV	TCGA-24-1469-01A-01W-0553-09	141	0.177304964539007	2.70481083950214
		OV	TCGA-25-1326-01A-01W-0492-08	104	0.105769230769231	1.05279560368314
		ESCA	TCGA-2H-A9GF-01A-11D-A37C-09	486	0.088477366255144	1.84486753121905
		ESCA	TCGA-2H-A9GH-01A-11D-A37C-09	333	0.0570570570570571	1.18200233686244
		ESCA	TCGA-2H-A9GI-01A-11D-A37C-09	431	0.0301624129930394	0.646990752808912
		ESCA	TCGA-2H-A9GJ-01A-11D-A37C-09	306	0.0522875816993464	1.07607609614788
		ESCA	TCGA-2H-A9GK-01A-11D-A37C-09	509	0.0825147347740668	1.86631947925648
		ESCA	TCGA-2H-A9GL-01A-12D-A37C-09	421	0.0380047505938242	0.765669529951376
		ESCA	TCGA-2H-A9GM-01A-11D-A37C-09	301	0.0365448504983389	0.760352380437824
		ESCA	TCGA-2H-A9GN-01A-11D-A37C-09	276	0.0652173913043478	0.995370388936788
		ESCA	TCGA-2H-A9GO-01A-11D-A37C-09	346	0.0549132947976879	1.05066874387772
		ESCA	TCGA-2H-A9GQ-01A-11D-A37C-09	324	0.058641975308642	1.12571651129756
		ESCA	TCGA-2H-A9GR-01A-12D-A37C-09	594	0.0303030303030303	0.933159739628239
		PAAD	TCGA-2L-AAQA-01A-21D-A38G-08	235	0.025531914893617	0.82947532411399
		PAAD	TCGA-2L-AAQJ-01A-12D-A397-08	135	0.0296296296296296	0.710978849240563
		GBM	TCGA-32-1977-01A-01D-1353-08	101	0.0495049504950495	0.82947532411399
		GBM	TCGA-32-2491-01A-01D-1353-08	110	0.0363636363636364	0.552983549409327
		GBM	TCGA-32-2632-01A-01D-1495-08	101	0.099009900990099	1.91417382487844
		GBM	TCGA-32-4210-01A-01D-1353-08	105	0.019047619047619	0.497685194468394
		GBM	TCGA-32-4211-01A-01D-1353-08	101	0.099009900990099	3.11053246542746
		LUSC	TCGA-33-4532-01A-01D-1267-08	422	0.113744075829384	2.65432103716477
		LUSC	TCGA-33-4533-01A-01D-1267-08	291	0.116838487972509	2.48842597234197
		LUSC	TCGA-33-4538-01A-01D-1267-08	210	0.104761904761905	1.95519183541155
		LUSC	TCGA-33-4547-01A-01D-1267-08	220	0.386363636363636	10.5758103824534
		LUSC	TCGA-33-4566-01A-01D-1441-08	1338	0.0538116591928251	1.30778591247169
		LUSC	TCGA-33-4582-01A-01D-1441-08	234	0.102564102564103	1.38888891479552
		LUSC	TCGA-33-4583-01A-01D-1441-08	568	0.0686619718309859	1.7645202349334
		LUSC	TCGA-33-4586-01A-01D-1441-08	381	0.0498687664041995	0.859638063172681
		LUSC	TCGA-33-6737-01A-11D-1817-08	477	0.289308176100629	7.30644221666366
		LUSC	TCGA-34-2596-01A-01D-1522-08	281	0.170818505338078	4.77777786689658
		LUSC	TCGA-34-2600-01A-01D-1522-08	496	0.366935483870968	12.5803757490622
		LUSC	TCGA-34-2608-01A-02D-1522-08	167	0.125748502994012	2.90316363439897
		LUSC	TCGA-34-5231-01A-21D-1817-08	678	0.0855457227138643	2.09172038254832
		LUSC	TCGA-34-5232-01A-21D-1817-08	196	0.0714285714285714	1.29029494862176
		LUSC	TCGA-34-5234-01A-01D-1632-08	174	0.0344827586206897	0.933159739628239
		LUSC	TCGA-34-5236-01A-21D-1817-08	239	0.100418410041841	1.99074077787358
		LUSC	TCGA-34-5239-01A-21D-1817-08	252	0.0833333333333333	1.58354380058125
		LUSC	TCGA-34-5240-01A-01D-1441-08	162	0.135802469135802	3.0414095217513
		LUSC	TCGA-34-5927-01A-11D-1817-08	281	0.124555160142349	2.29197129031497
		LUSC	TCGA-34-5928-01A-11D-1817-08	415	0.36144578313253	12.8711688224585
		LUSC	TCGA-34-5929-01A-11D-1817-08	184	0.195652173913043	5.97222233362073
		LUAD	TCGA-35-4122-01A-01D-1105-08	374	0.10427807486631	1.83110590417617
		LUAD	TCGA-35-4123-01A-01D-1105-08	321	0.0311526479750779	0.529452334540845
		LUAD	TCGA-35-5375-01A-01D-1625-08	458	0.0720524017467249	1.26335472441977
		LUSC	TCGA-37-3783-01A-01D-1267-08	412	0.361650485436893	10.9051608787928
		LUSC	TCGA-37-3789-01A-01D-0983-08	459	0.185185185185185	7.55415027318098
		LUSC	TCGA-37-4133-01A-01D-1352-08	300	0.0833333333333333	1.63712235022498
		LUSC	TCGA-37-4135-01A-01D-1352-08	299	0.0635451505016722	1.07454757896585
		LUSC	TCGA-37-4141-01A-02D-1352-08	335	0.0567164179104478	1.00595943562761
		LUSC	TCGA-37-5819-01A-01D-1632-08	785	0.0560509554140127	1.27314817189589
		LUAD	TCGA-38-4625-01A-01D-1553-08	625	0.1344	3.66715406450396
		LUAD	TCGA-38-4626-01A-01D-1553-08	320	0.04375	0.774176969173058
		LUAD	TCGA-38-4628-01A-01D-1265-08	131	0.099236641221374	1.29398150561782
		LUAD	TCGA-38-4629-01A-02D-1265-08	305	0.114754098360656	1.77744712310141
		LUAD	TCGA-38-4630-01A-01D-1265-08	149	0.281879194630872	7.46527791702591
		LUAD	TCGA-38-4631-01A-01D-1753-08	754	0.0397877984084881	1.08192433580086
		LUAD	TCGA-38-4632-01A-01D-1753-08	551	0.0508166969147005	1.20130909009612
		LUAD	TCGA-38-7271-01A-11D-2036-08	106	0.358490566037736	18.912037389799
		LUSC	TCGA-39-5016-01A-01D-1441-08	379	0.0659630606860158	1.48120593591784
		LUSC	TCGA-39-5019-01A-01D-1817-08	204	0.0784313725490196	1.73107893728137
		LUSC	TCGA-39-5021-01A-01D-1441-08	157	0.0955414012738854	1.43563036865883
		LUSC	TCGA-39-5022-01A-21D-1817-08	299	0.464882943143813	18.2048005345018
		LUSC	TCGA-39-5024-01A-21D-1817-08	226	0.243362831858407	6.84317142394042
		LUSC	TCGA-39-5027-01A-21D-1817-08	347	0.0662824207492795	1.50615256220698
		LUSC	TCGA-39-5028-01A-01D-1441-08	203	0.364532019704433	14.1648863041005
		LUSC	TCGA-39-5029-01A-01D-1441-08	158	0.151898734177215	3.14327491243196
		LUSC	TCGA-39-5030-01A-01D-1441-08	283	0.162544169611307	3.36669396258031
		LUSC	TCGA-39-5031-01A-01D-1441-08	662	0.462235649546828	16.9212966119254
		LUSC	TCGA-39-5035-01A-01D-1441-08	159	0.251572327044025	7.65669529951376
		LUSC	TCGA-39-5036-01A-01D-1441-08	305	0.111475409836066	2.64395259561334
		LUSC	TCGA-39-5037-01A-01D-1441-08	254	0.0905511811023622	1.78855616762079
		LUSC	TCGA-39-5039-01A-01D-1441-08	176	0.0454545454545455	0.663580259291192
		PAAD	TCGA-3A-A9I9-01A-11D-A38G-08	124	0.145161290322581	2.63480397071503
		SARC	TCGA-3B-A9HI-01A-11D-A387-09	103	0.058252427184466	1.24421298617099
		SARC	TCGA-3B-A9HL-01A-11D-A387-09	103	0.135922330097087	5.80632726879793
		SARC	TCGA-3B-A9HO-01A-11D-A387-09	102	0.137254901960784	2.48842597234197
		SARC	TCGA-3B-A9HP-01A-11D-A387-09	101	0.0099009900990099	0.155526623271373
		SARC	TCGA-3B-A9HQ-01A-11D-A387-09	121	0.0578512396694215	1.16126545375959
		SARC	TCGA-3B-A9HT-01A-11D-A38Z-09	395	0.0253164556962025	0.606933163985847
		SARC	TCGA-3B-A9HV-01A-11D-A38Z-09	106	0.0377358490566038	0.82947532411399
		SARC	TCGA-3B-A9I3-01A-11D-A38Z-09	102	0.0294117647058824	0.355489424620282
		THYM	TCGA-3G-AB0O-01A-22D-A423-09	109	0.00917431192660551	0.118496474873427
		THYM	TCGA-3G-AB0Q-01A-11D-A423-09	114	0.0175438596491228	0.452441085880358
		THYM	TCGA-3G-AB0T-01A-11D-A423-09	160	0.03125	0.518422077571244
		THYM	TCGA-3G-AB14-01A-11D-A423-09	176	0.0397727272727273	0.5123229943057
		THYM	TCGA-3G-AB19-01A-21D-A423-09	123	0.024390243902439	0.497685194468394
		THYM	TCGA-3Q-A9WF-01A-11D-A423-09	103	0	0
		SARC	TCGA-3R-A8YX-01A-11D-A37C-09	146	0.0342465753424658	0.540962167900428
		THYM	TCGA-3S-A8YW-01A-11D-A423-09	127	0.0393700787401575	0.888723561550704
		THYM	TCGA-3S-AAYX-01A-11D-A423-09	139	0.0143884892086331	0.452441085880358
		THYM	TCGA-3T-AA9L-01A-11D-A423-09	106	0	0
		CHOL	TCGA-3X-AAV9-01A-72D-A417-09	144	0.118055555555556	2.82021610198757
		CHOL	TCGA-3X-AAVC-01A-21D-A417-09	144	0.0416666666666667	0.622106493085493
		CHOL	TCGA-3X-AAVE-01A-11D-A417-09	116	0.0689655172413793	1.42195769848113
		LUSC	TCGA-43-2578-01A-01D-1522-08	296	0.0608108108108108	1.27976192863301
		LUSC	TCGA-43-3394-01A-01D-0983-08	148	0.0743243243243243	2.28105714131347
		LUSC	TCGA-43-3920-01A-01D-0983-08	325	0.166153846153846	3.35937506266166
		LUSC	TCGA-43-5668-01A-01D-1632-08	653	0.0505359877488515	0.933159739628239
		LUSC	TCGA-43-6143-01A-11D-1817-08	337	0.0979228486646884	2.56618928397766
		LUSC	TCGA-43-6647-01A-11D-1817-08	170	0.0823529411764706	1.3935185445115
		LUSC	TCGA-43-6770-01A-11D-1817-08	221	0.113122171945701	1.68136890023106
		LUSC	TCGA-43-6771-01A-11D-1817-08	207	0.0483091787439614	0.995370388936788
		LUAD	TCGA-44-2655-01A-01D-1553-08	136	0.0588235294117647	1.65895064822798
		LUAD	TCGA-44-2656-01A-02D-0969-08	541	0.044362292051756	0.947971798987417
		LUAD	TCGA-44-2656-01A-02W-0928-08	491	0.0305498981670061	0.565551357350448
		LUAD	TCGA-44-2657-01A-01D-1105-08	427	0.0819672131147541	1.97942975072657
		LUAD	TCGA-44-2659-01A-01D-0969-08	277	0.0324909747292419	0.622106493085493
		LUAD	TCGA-44-2659-01A-01W-0928-08	194	0.0412371134020619	0.995370388936788
		LUAD	TCGA-44-2662-01A-01D-0969-08	133	0.413533834586466	15.2070476087565
		LUAD	TCGA-44-2662-01A-01W-0928-08	126	0.365079365079365	12.7186216364145
		LUAD	TCGA-44-2668-01A-01D-0969-08	209	0.129186602870813	2.92119570666231
		LUAD	TCGA-44-2668-01A-01W-0928-08	216	0.0972222222222222	2.09027781676726
		LUAD	TCGA-44-3396-01A-01D-1553-08	190	0.289473684210526	7.20333834098992
		LUAD	TCGA-44-3398-01A-01D-1105-08	230	0.291304347826087	7.93926381651962
		LUAD	TCGA-44-3918-01A-01D-1105-08	1034	0.0831721470019342	2.01891163793783
		LUAD	TCGA-44-4112-01A-01D-1105-08	263	0.0456273764258555	1.10596709881865
		LUAD	TCGA-44-4112-01A-01D-1458-08	231	0.0735930735930736	2.11516207649068
		LUAD	TCGA-44-5643-01A-01D-1625-08	144	0.125	3.19940482158253
		LUAD	TCGA-44-5644-01A-21D-2036-08	990	0.0484848484848485	1.32716051858238
		LUAD	TCGA-44-6144-01A-11D-1753-08	225	0.0755555555555556	2.11516207649068
		LUAD	TCGA-44-6145-01A-11D-1753-08	336	0.0446428571428571	1.09783498779793
		LUAD	TCGA-44-6147-01A-11D-1753-08	211	0.113744075829384	2.21193419763731
		LUAD	TCGA-44-6774-01A-21D-1855-08	295	0.0305084745762712	0.699869804721179
		LUAD	TCGA-44-6776-01A-11D-1855-08	197	0.0406091370558376	0.947971798987417
		LUAD	TCGA-44-6777-01A-11D-1855-08	388	0.177835051546392	4.76948311365544
		LUAD	TCGA-44-6778-01A-11D-1855-08	430	0.0418604651162791	0.814393954584645
		LUAD	TCGA-44-6779-01A-11D-1855-08	104	0.0865384615384615	1.86631947925648
		LUAD	TCGA-44-7659-01A-11D-2063-08	158	0.0759493670886076	1.86631947925648
		LUAD	TCGA-44-7660-01A-11D-2063-08	413	0.0774818401937046	1.34965476466005
		LUAD	TCGA-44-7661-01A-11D-2063-08	282	0.173758865248227	3.69493553468959
		LUAD	TCGA-44-7662-01A-11D-2063-08	614	0.0879478827361563	2.20286889354863
		LUAD	TCGA-44-7667-01A-31D-2063-08	486	0.0493827160493827	1.14850429492706
		LUAD	TCGA-44-7669-01A-21D-2063-08	494	0.0384615384615385	0.81517402542237
		LUAD	TCGA-44-7670-01A-11D-2063-08	1037	0.108968177434908	2.73002072693828
		LUAD	TCGA-44-7671-01A-11D-2063-08	248	0.0483870967741935	0.878267990238343
		LUAD	TCGA-44-7672-01A-11D-2063-08	178	0.050561797752809	1.31740198535751
		LUAD	TCGA-44-8117-01A-11D-2238-08	772	0.0453367875647668	1.14598564515749
		LUAD	TCGA-44-8119-01A-11D-2238-08	680	0.0367647058823529	0.723379643122666
		LUAD	TCGA-44-8120-01A-11D-2238-08	657	0.0502283105022831	1.02647571359106
		LUAD	TCGA-44-A479-01A-31D-A24D-08	290	0.0586206896551724	1.56678672332643
		LUAD	TCGA-44-A47A-01A-21D-A24D-08	240	0.254166666666667	6.89972655967547
		LUAD	TCGA-44-A4SS-01A-11D-A24P-08	505	0.102970297029703	2.12128115675053
		LUAD	TCGA-44-A4SU-01A-11D-A24P-08	159	0.0566037735849057	0.895833350043109
		LUSC	TCGA-46-3765-01A-01D-0983-08	344	0.0988372093023256	3.38425932238508
		LUSC	TCGA-46-3767-01A-01D-0983-08	221	0.0678733031674208	1.55526623271373
		LUSC	TCGA-46-3768-01A-01D-0983-08	364	0.0741758241758242	1.97610297803627
		LUSC	TCGA-46-3769-01A-01D-0983-08	940	0.19468085106383	4.33697098036744
		LUSC	TCGA-46-6025-01A-11D-1817-08	202	0.153465346534653	2.57137350475337
		LUSC	TCGA-46-6026-01A-11D-1817-08	222	0.18018018018018	3.82834764975688
		LUAD	TCGA-49-4486-01A-01D-1265-08	287	0.491289198606272	14.0347224840087
		LUAD	TCGA-49-4487-01A-21D-1855-08	423	0.144208037825059	2.91911508293962
		LUAD	TCGA-49-4488-01A-01D-1753-08	306	0.0882352941176471	3.05397732969242
		LUAD	TCGA-49-4494-01A-01D-1265-08	197	0.0710659898477157	1.65895064822798
		LUAD	TCGA-49-4505-01A-01D-1931-08	181	0.0883977900552486	2.84391539696225
		LUAD	TCGA-49-4506-01A-01D-1265-08	144	0.0277777777777778	0.585511993492228
		LUAD	TCGA-49-4507-01A-01D-1265-08	213	0.154929577464789	5.13237856795531
		LUAD	TCGA-49-4514-01A-21D-1855-08	316	0.253164556962025	7.10978849240563
		LUAD	TCGA-49-6742-01A-11D-1855-08	309	0.323624595469256	10.8192433580086
		LUAD	TCGA-49-6743-01A-11D-1855-08	830	0.192771084337349	3.82834764975688
		LUAD	TCGA-49-6744-01A-11D-1855-08	257	0.0350194552529183	0.699869804721179
		LUAD	TCGA-49-6745-01A-11D-1855-08	147	0.421768707482993	8.1201268571159
		LUAD	TCGA-49-6761-01A-31D-1945-08	201	0.283582089552239	6.75429906778535
		LUAD	TCGA-49-6767-01A-11D-1855-08	488	0.0737704918032787	1.65895064822798
		CHOL	TCGA-4G-AAZO-01A-12D-A417-09	279	0.028673835125448	1.24421298617099
		CHOL	TCGA-4G-AAZT-01A-11D-A417-09	141	0.0212765957446809	0.339330814410269
		THYM	TCGA-4V-A9QI-01A-11D-A423-09	126	0.0238095238095238	0.324577300740257
		THYM	TCGA-4V-A9QJ-01A-11D-A423-09	122	0.040983606557377	0.888723561550704
		THYM	TCGA-4V-A9QL-01A-11D-A423-09	150	0.0333333333333333	0.592482374367136
		THYM	TCGA-4V-A9QM-01A-11D-A423-09	106	0	0
		THYM	TCGA-4V-A9QQ-01A-11D-A423-09	124	0.0241935483870968	0.678661628820537
		THYM	TCGA-4V-A9QR-01A-11D-A423-09	290	0.0137931034482759	0.368655699606218
		THYM	TCGA-4V-A9QS-01A-11D-A423-09	118	0.0254237288135593	0.439133995119171
		THYM	TCGA-4V-A9QT-01A-11D-A423-09	143	0.041958041958042	0.649154601480514
		THYM	TCGA-4V-A9QX-01A-11D-A423-09	103	0.029126213592233	0.439133995119171
		THYM	TCGA-4X-A9F9-01A-11D-A423-09	150	0.00666666666666667	0.11311027147009
		THYM	TCGA-4X-A9FA-01A-11D-A423-09	115	0.0173913043478261	0.331790129645596
		THYM	TCGA-4X-A9FB-01A-11D-A423-09	129	0.0232558139534884	0.414737662056995
		THYM	TCGA-4X-A9FC-01A-11D-A423-09	138	0.0289855072463768	0.473985899493709
		THYM	TCGA-4X-A9FD-01A-11D-A423-09	121	0.0165289256198347	0.276491774704663
		LUAD	TCGA-50-5044-01A-21D-1855-08	159	0.509433962264151	16.7968753133083
		LUAD	TCGA-50-5045-01A-01D-1625-08	347	0.0518731988472622	1.11979168755389
		LUAD	TCGA-50-5049-01A-01D-1625-08	946	0.0443974630021142	1.00494125806118
		LUAD	TCGA-50-5051-01A-21D-1855-08	121	0.0578512396694215	1.0246459886114
		LUAD	TCGA-50-5066-01A-01D-1625-08	169	0.0946745562130177	2.21193419763731
		LUAD	TCGA-50-5066-02A-11D-2107-08	273	0.0476190476190476	0.789013113181601
		LUAD	TCGA-50-5072-01A-21D-1855-08	184	0.108695652173913	2.48842597234197
		LUAD	TCGA-50-5930-01A-11D-1753-08	1179	0.0245971162001696	0.534550764429016
		LUAD	TCGA-50-5931-01A-11D-1753-08	283	0.0671378091872792	1.47750292107805
		LUAD	TCGA-50-5933-01A-11D-1753-08	553	0.0687160940325497	1.57600311581658
		LUAD	TCGA-50-5935-01A-11D-1753-08	116	0.362068965517241	6.53211817739767
		LUAD	TCGA-50-5936-01A-11D-1625-08	129	0.248062015503876	6.63580259291192
		LUAD	TCGA-50-5941-01A-11D-1753-08	396	0.0808080808080808	1.39701107219198
		LUAD	TCGA-50-5946-01A-11D-1753-08	688	0.152616279069767	3.43795693547246
		LUAD	TCGA-50-6590-01A-12D-1855-08	996	0.146586345381526	3.46009706630407
		LUAD	TCGA-50-6592-01A-11D-1753-08	295	0.169491525423729	3.77034238233632
		LUAD	TCGA-50-6593-01A-11D-1753-08	337	0.0534124629080119	0.845125801927462
		LUAD	TCGA-50-6594-01A-11D-1753-08	491	0.0855397148676171	1.86631947925648
		LUAD	TCGA-50-6595-01A-12D-1855-08	101	0.178217821782178	2.48842597234197
		LUAD	TCGA-50-7109-01A-11D-2036-08	274	0.0437956204379562	0.728319796783016
		LUSC	TCGA-51-4079-01A-01D-1458-08	398	0.125628140703518	2.76491774704663
		LUSC	TCGA-51-4080-01A-01D-1458-08	295	0.0440677966101695	0.808738441011141
		LUSC	TCGA-51-4081-01A-01D-1458-08	218	0.073394495412844	1.24421298617099
		LUAD	TCGA-53-7624-01A-11D-2063-08	885	0.136723163841808	2.81401441732129
		LUAD	TCGA-53-7626-01A-12D-2063-08	383	0.0678851174934726	1.84854500802546
		LUAD	TCGA-53-7813-01A-11D-2167-08	155	0.032258064516129	0.540962167900428
		LUAD	TCGA-53-A4EZ-01A-12D-A24P-08	565	0.0530973451327434	1.00882134013864
		LUAD	TCGA-55-1592-01A-01D-0969-08	379	0.0738786279683377	1.3935185445115
		LUAD	TCGA-55-1592-01A-01W-0928-08	295	0.105084745762712	2.03003171427898
		LUAD	TCGA-55-1594-01A-01D-1040-01	162	0.185185185185185	4.39133995119171
		LUAD	TCGA-55-1594-01A-01W-0928-08	130	0.176923076923077	3.81558649092436
		LUAD	TCGA-55-1595-01A-01D-0969-08	333	0.045045045045045	0.868055571747199
		LUAD	TCGA-55-1596-01A-01D-1040-01	139	0.0575539568345324	1.10596709881865
		LUAD	TCGA-55-1596-01A-01W-0928-08	109	0	0
		LUAD	TCGA-55-5899-01A-11D-1625-08	472	0.161016949152542	3.56830894147151
		LUAD	TCGA-55-6642-01A-11D-1855-08	144	0.0555555555555556	1.99074077787358
		LUAD	TCGA-55-6712-01A-11D-1855-08	179	0.424581005586592	11.1247278763523
		LUAD	TCGA-55-6968-01A-11D-1945-08	587	0.473594548551959	19.2161783419741
		LUAD	TCGA-55-6969-01A-11D-1945-08	528	0.0492424242424242	0.779506931095075
		LUAD	TCGA-55-6970-01A-11D-1945-08	170	0.0823529411764706	1.24421298617099
		LUAD	TCGA-55-6972-01A-11D-1945-08	293	0.310580204778157	6.12018279684106
		LUAD	TCGA-55-6979-01A-11D-1945-08	154	0.233766233766234	4.26587309544338
		LUAD	TCGA-55-6982-01A-11D-1945-08	254	0.531496062992126	13.4375002506466
		LUAD	TCGA-55-6983-01A-11D-1945-08	115	0.0521739130434783	0.933159739628239
		LUAD	TCGA-55-6985-01A-11D-1945-08	506	0.0217391304347826	0.456211428262695
		LUAD	TCGA-55-6987-01A-11D-1945-08	241	0.236514522821577	3.83352109252682
		LUAD	TCGA-55-7227-01A-11D-2036-08	172	0.0581395348837209	1.08192433580086
		LUAD	TCGA-55-7281-01A-11D-2036-08	424	0.0707547169811321	1.33308534232606
		LUAD	TCGA-55-7283-01A-11D-2036-08	239	0.188284518828452	5.08996221615403
		LUAD	TCGA-55-7570-01A-11D-2036-08	390	0.158974358974359	3.08564820570404
		LUAD	TCGA-55-7574-01A-11D-2036-08	277	0.317689530685921	6.84317142394042
		LUAD	TCGA-55-7576-01A-11D-2063-08	477	0.0607966457023061	1.24421298617099
		LUAD	TCGA-55-7724-01A-11D-2167-08	243	0.111111111111111	1.91964289294952
		LUAD	TCGA-55-7725-01A-11D-2167-08	135	0.0444444444444444	1.14850429492706
		LUAD	TCGA-55-7726-01A-11D-2167-08	125	0.376	9.74633505833939
		LUAD	TCGA-55-7727-01A-11D-2167-08	287	0.268292682926829	8.7094909031969
		LUAD	TCGA-55-7728-01A-11D-2184-08	110	0.0454545454545455	1.38245887352332
		LUAD	TCGA-55-7815-01A-11D-2167-08	158	0.0379746835443038	0.785818728107991
		LUAD	TCGA-55-7903-01A-11D-2167-08	163	0.122699386503067	2.76491774704663
		LUAD	TCGA-55-7907-01A-11D-2167-08	1214	0.119439868204283	2.98199806602963
		LUAD	TCGA-55-7910-01A-11D-2167-08	298	0.0469798657718121	0.967721211466322
		LUAD	TCGA-55-7911-01A-11D-2167-08	233	0.0643776824034335	1.43563036865883
		LUAD	TCGA-55-7913-01B-11D-2238-08	367	0.0980926430517711	2.71464651528215
		LUAD	TCGA-55-7914-01A-11D-2167-08	194	0.0876288659793814	1.92287461499152
		LUAD	TCGA-55-7994-01A-11D-2184-08	1632	0.0533088235294118	0.997663869095629
		LUAD	TCGA-55-7995-01A-11D-2184-08	644	0.0993788819875776	2.06830210688164
		LUAD	TCGA-55-8085-01A-11D-2238-08	278	0.280575539568345	6.06553830758355
		LUAD	TCGA-55-8089-01A-11D-2238-08	1354	0.196454948301329	5.42558449707348
		LUAD	TCGA-55-8092-01A-11D-2238-08	612	0.156862745098039	3.73263895851296
		LUAD	TCGA-55-8094-01A-11D-2238-08	493	0.0466531440162272	1.1006499493051
		LUAD	TCGA-55-8096-01A-11D-2238-08	148	0.0743243243243243	1.44066766819798
		LUAD	TCGA-55-8097-01A-11D-2238-08	117	0.0769230769230769	1.39973960944236
		LUAD	TCGA-55-8203-01A-11D-2238-08	422	0.0308056872037915	0.752314828847573
		LUAD	TCGA-55-8204-01A-11D-2238-08	247	0.226720647773279	6.0587762804848
		LUAD	TCGA-55-8205-01A-11D-2238-08	561	0.228163992869875	5.79124589926859
		LUAD	TCGA-55-8207-01A-11D-2238-08	335	0.0388059701492537	0.718878614232125
		LUAD	TCGA-55-8208-01A-11D-2238-08	491	0.319755600814664	6.97647995817302
		LUAD	TCGA-55-8299-01A-11D-2284-08	311	0.0643086816720257	1.24421298617099
		LUAD	TCGA-55-8301-01A-11D-2284-08	357	0.103641456582633	2.42294107833297
		LUAD	TCGA-55-8302-01A-11D-2323-08	728	0.0343406593406593	0.852200675459579
		LUAD	TCGA-55-8506-01A-11D-2393-08	1791	0.0262423227247348	0.672161038506165
		LUAD	TCGA-55-8507-01A-11D-2393-08	1034	0.0473887814313346	0.930785287364554
		LUAD	TCGA-55-8508-01A-11D-2393-08	191	0.06282722513089	1.19444446672415
		LUAD	TCGA-55-8510-01A-11D-2393-08	342	0.0760233918128655	1.90291397884974
		LUAD	TCGA-55-8511-01A-11D-2393-08	617	0.102106969205835	2.2720411051818
		LUAD	TCGA-55-8514-01A-11D-2393-08	281	0.0498220640569395	1.45158181719948
		LUAD	TCGA-55-8614-01A-11D-2393-08	258	0.0930232558139535	1.75653598047669
		LUAD	TCGA-55-8615-01A-11D-2393-08	134	0.0298507462686567	0.663580259291192
		LUAD	TCGA-55-8616-01A-11D-2393-08	497	0.0402414486921529	1.10596709881865
		LUAD	TCGA-55-8620-01A-11D-2393-08	533	0.0412757973733583	0.729938285220311
		LUAD	TCGA-55-8621-01A-11D-2393-08	127	0.125984251968504	4.42386839527461
		LUAD	TCGA-55-A48X-01A-11D-A24D-08	385	0.0649350649350649	1.51733290996462
		LUAD	TCGA-55-A48Y-01A-11D-A24D-08	361	0.573407202216066	20.6041670509915
		LUAD	TCGA-55-A490-01A-11D-A24D-08	1435	0.0655052264808362	1.59123837687174
		LUAD	TCGA-55-A491-01A-11D-A24D-08	381	0.0761154855643045	1.53541177016845
		LUAD	TCGA-55-A492-01A-11D-A24D-08	281	0.0533807829181495	1.24421298617099
		LUAD	TCGA-55-A493-01A-11D-A24D-08	299	0.210702341137124	5.05712375024336
		LUAD	TCGA-55-A494-01A-11D-A24P-08	222	0.0630630630630631	2.90316363439897
		LUAD	TCGA-55-A4DF-01A-11D-A24D-08	847	0.425029515938607	12.6173711273677
		LUAD	TCGA-55-A4DG-01A-11D-A24D-08	733	0.0422919508867667	1.01501585713949
		LUSC	TCGA-56-1622-01A-01D-1521-08	228	0.0482456140350877	0.943885713646954
		LUSC	TCGA-56-5897-01A-11D-1632-08	112	0.267857142857143	9.33159739628239
		LUSC	TCGA-56-5898-01A-11D-1632-08	159	0.0880503144654088	1.74189818063938
		LUSC	TCGA-56-6545-01A-11D-1817-08	276	0.173913043478261	4.26587309544338
		LUSC	TCGA-56-6546-01A-11D-1817-08	346	0.0346820809248555	0.663580259291192
		THYM	TCGA-5K-AAAP-01A-11D-A423-09	101	0.0198019801980198	0.710978849240563
		THYM	TCGA-5U-AB0D-01A-11D-A423-09	135	0.037037037037037	0.777633116356866
		THYM	TCGA-5U-AB0E-01A-11D-A423-09	134	0.0149253731343284	0.160543611118837
		THYM	TCGA-5U-AB0F-01A-11D-A423-09	135	0.037037037037037	0.497685194468394
		THYM	TCGA-5V-A9RR-01A-11D-A423-09	115	0	0
		LUSC	TCGA-60-2698-01A-01D-1522-08	1278	0.418622848200313	12.2138339009445
		LUSC	TCGA-60-2707-01A-01D-1522-08	135	0.281481481481481	18.912037389799
		LUSC	TCGA-60-2708-01A-01D-1522-08	190	0.136842105263158	3.59439307116062
		LUSC	TCGA-60-2709-01A-21D-1817-08	198	0.095959595959596	1.81846513363452
		LUSC	TCGA-60-2710-01A-01D-1522-08	190	0.0368421052631579	0.645147474310881
		LUSC	TCGA-60-2711-01A-01D-1522-08	130	0.1	2.02184610252785
		LUSC	TCGA-60-2713-01A-01D-1522-08	268	0.104477611940299	1.93544242293264
		LUSC	TCGA-60-2715-01A-01D-1522-08	181	0.0552486187845304	1.55526623271373
		LUSC	TCGA-60-2719-01A-01D-1522-08	187	0.0909090909090909	2.48842597234197
		LUSC	TCGA-60-2720-01A-01D-1522-08	387	0.224806201550388	3.86594749274556
		LUSC	TCGA-60-2722-01A-01D-1522-08	327	0.122324159021407	1.99074077787358
		LUSC	TCGA-60-2723-01A-01D-1522-08	294	0.054421768707483	0.971093062377354
		LUSC	TCGA-60-2724-01A-01D-1522-08	338	0.0502958579881657	1.14333085215712
		LUSC	TCGA-60-2725-01A-01D-1267-08	176	0.0852272727272727	1.28711688224585
		LUSC	TCGA-60-2726-01A-01D-1522-08	303	0.118811881188119	2.55952385726603
		LUAD	TCGA-62-8394-01A-11D-2323-08	145	0.206896551724138	3.73263895851296
		LUAD	TCGA-62-8399-01A-21D-2323-08	560	0.264285714285714	7.67264674805441
		LUAD	TCGA-62-A46O-01A-11D-A24D-08	943	0.125132555673383	2.9962680075138
		LUAD	TCGA-62-A46P-01A-11D-A24D-08	312	0.0256410256410256	0.710978849240563
		LUAD	TCGA-62-A46R-01A-11D-A24D-08	162	0.141975308641975	3.81558649092436
		LUAD	TCGA-62-A46S-01A-11D-A24D-08	146	0.089041095890411	1.90291397884974
		LUAD	TCGA-62-A470-01A-11D-A24D-08	123	0.0569105691056911	1.74189818063938
		LUAD	TCGA-62-A471-01A-12D-A24D-08	124	0.354838709677419	7.29938285220311
		LUSC	TCGA-63-5128-01A-01D-1441-08	320	0.0625	1.30969788017998
		LUSC	TCGA-63-5131-01A-01D-1441-08	288	0.135416666666667	2.42621532303342
		LUSC	TCGA-63-6202-01A-11D-1817-08	367	0.0544959128065395	1.15740742899627
		LUAD	TCGA-64-1676-01A-01D-0969-08	343	0.032069970845481	0.82947532411399
		LUAD	TCGA-64-1676-01A-01W-0928-08	299	0.0301003344481605	0.486865951110386
		LUAD	TCGA-64-1677-01A-01W-0928-08	232	0.237068965517241	5.0690158695855
		LUAD	TCGA-64-1678-01A-01W-0928-08	427	0.107728337236534	2.66203708669141
		LUAD	TCGA-64-1679-01A-21D-2063-08	523	0.0783938814531549	1.82188330117894
		LUAD	TCGA-64-5774-01A-01D-1625-08	147	0.0612244897959184	1.31740198535751
		LUAD	TCGA-64-5775-01A-01D-1625-08	504	0.0376984126984127	0.945601869489949
		LUAD	TCGA-64-5778-01A-01D-1625-08	515	0.0699029126213592	1.79166670008622
		LUAD	TCGA-64-5779-01A-01D-1625-08	379	0.050131926121372	1.21231008908968
		LUAD	TCGA-64-5781-01A-01D-1625-08	1179	0.0865139949109415	1.83927137086146
		LUAD	TCGA-64-5815-01A-01D-1625-08	191	0.031413612565445	0.785818728107991
		LUSC	TCGA-66-2727-01A-01D-0983-08	219	0.0867579908675799	1.81846513363452
		LUSC	TCGA-66-2734-01A-01D-0983-08	289	0.0173010380622837	0.565551357350448
		LUSC	TCGA-66-2742-01A-01D-0983-08	232	0.0603448275862069	1.24421298617099
		LUSC	TCGA-66-2744-01A-01D-0983-08	274	0.0802919708029197	3.42158571197021
		LUSC	TCGA-66-2754-01A-01D-0983-08	319	0.103448275862069	1.95519183541155
		LUSC	TCGA-66-2755-01A-01D-1522-08	221	0.0497737556561086	0.977595917705774
		LUSC	TCGA-66-2756-01A-01D-1522-08	506	0.0533596837944664	1.06646827386084
		LUSC	TCGA-66-2757-01A-01D-1522-08	241	0.0622406639004149	0.91039974597877
		LUSC	TCGA-66-2758-01A-02D-1522-08	361	0.174515235457064	2.85037884104626
		LUSC	TCGA-66-2759-01A-01D-1522-08	446	0.15695067264574	3.70616634178591
		LUSC	TCGA-66-2763-01A-01D-1522-08	399	0.0927318295739348	2.30179402441632
		LUSC	TCGA-66-2766-01A-01D-1522-08	401	0.197007481296758	5.61673290900045
		LUSC	TCGA-66-2767-01A-01D-1522-08	352	0.0852272727272727	1.91417382487844
		LUSC	TCGA-66-2768-01A-01D-1522-08	258	0.228682170542636	5.6468127833914
		LUSC	TCGA-66-2770-01A-01D-1522-08	254	0.0551181102362205	0.893281118276605
		LUSC	TCGA-66-2771-01A-01D-0983-08	271	0.232472324723247	5.80632726879793
		LUSC	TCGA-66-2773-01A-01D-1267-08	607	0.42504118616145	13.9568239318311
		LUSC	TCGA-66-2777-01A-01D-1267-08	210	0.0952380952380952	1.77744712310141
		LUSC	TCGA-66-2778-01A-02D-1522-08	158	0.291139240506329	8.80519959444082
		LUSC	TCGA-66-2780-01A-01D-1522-08	137	0.124087591240876	1.92287461499152
		LUSC	TCGA-66-2781-01A-01D-1522-08	152	0.118421052631579	2.48842597234197
		LUSC	TCGA-66-2782-01A-01D-1522-08	378	0.153439153439153	3.52021235111791
		LUSC	TCGA-66-2783-01A-01D-1267-08	247	0.0769230769230769	1.8912037389799
		LUSC	TCGA-66-2785-01A-01D-1522-08	1213	0.457543281121187	15.0117001592369
		LUSC	TCGA-66-2786-01A-01D-1522-08	228	0.210526315789474	4.59401717970825
		LUSC	TCGA-66-2787-01A-01D-0983-08	563	0.0550621669626998	1.13442948739119
		LUSC	TCGA-66-2788-01A-01D-0983-08	209	0.143540669856459	3.24577300740257
		LUSC	TCGA-66-2789-01A-01D-0983-08	372	0.0833333333333333	1.37752152040359
		LUSC	TCGA-66-2791-01A-01D-0983-08	352	0.153409090909091	3.35937506266166
		LUSC	TCGA-66-2792-01A-01D-0983-08	172	0.0581395348837209	1.03684415514249
		LUSC	TCGA-66-2793-01A-01D-1267-08	330	0.0515151515151515	0.961437307495761
		LUSC	TCGA-66-2794-01A-01D-1267-08	164	0.225609756097561	3.54122157602511
		LUSC	TCGA-66-2795-01A-02D-0983-08	375	0.056	1.18765785043594
		LUSC	TCGA-66-2800-01A-01D-1267-08	238	0.0672268907563025	1.1375661587849
		LUAD	TCGA-67-3770-01A-01D-0969-08	114	0.0350877192982456	0.995370388936788
		LUAD	TCGA-67-3770-01A-01W-0928-08	122	0.0655737704918033	1.17102398698446
		LUAD	TCGA-67-3771-01A-01D-1040-01	684	0.195906432748538	3.92293035639793
		LUAD	TCGA-67-3771-01A-01W-0928-08	614	0.174267100977199	3.41360998769988
		LUAD	TCGA-67-3773-01A-01D-1040-01	114	0.0350877192982456	0.82947532411399
		LUAD	TCGA-67-4679-01B-01D-1753-08	307	0.0488599348534202	0.746527791702591
		LUAD	TCGA-67-6215-01A-11D-1753-08	132	0.0681818181818182	1.59970241079127
		LUAD	TCGA-67-6217-01A-11D-1753-08	203	0.0492610837438424	1.03684415514249
		LUAD	TCGA-69-7765-01A-11D-2167-08	720	0.108333333333333	2.15663584269637
		LUAD	TCGA-69-7973-01A-11D-2184-08	251	0.0438247011952191	1.0138031739171
		LUAD	TCGA-69-7974-01A-11D-2184-08	491	0.054989816700611	0.95982144647476
		LUAD	TCGA-69-7978-01A-11D-2184-08	696	0.209770114942529	5.19014559945611
		LUAD	TCGA-69-7979-01A-11D-2184-08	1498	0.0534045393858478	1.28434888895069
		LUAD	TCGA-69-7980-01A-11D-2184-08	810	0.164197530864198	3.94000778954145
		LUAD	TCGA-69-8253-01A-11D-2284-08	171	0.111111111111111	2.36400467372487
		LUAD	TCGA-69-8255-01A-11D-2284-08	316	0.0981012658227848	1.64130223707662
		LUAD	TCGA-69-A59K-01A-11D-A25L-08	492	0.0813008130081301	1.91417382487844
		LUSC	TCGA-70-6722-01A-11D-1817-08	293	0.0819112627986348	2.38888893344829
		LUSC	TCGA-70-6723-01A-11D-1817-08	111	0.027027027027027	0.622106493085493
		LUAD	TCGA-73-4658-01A-01D-1753-08	307	0.309446254071661	7.62582152814475
		LUAD	TCGA-73-4659-01A-01D-1265-08	226	0.0575221238938053	1.1155012979464
		LUAD	TCGA-73-4662-01A-01D-1265-08	221	0.0769230769230769	1.92287461499152
		LUAD	TCGA-73-4666-01A-01D-1265-08	406	0.0640394088669951	1.43775722846425
		LUAD	TCGA-73-4668-01A-01D-1265-08	617	0.0372771474878444	0.665509271672853
		LUAD	TCGA-73-4670-01A-01D-1265-08	321	0.059190031152648	1.52516430562895
		LUAD	TCGA-73-4677-01A-01D-1265-08	269	0.0631970260223048	1.08469850076445
		LUAD	TCGA-73-7498-01A-12D-2184-08	113	0.0176991150442478	0.292755996746114
		LUAD	TCGA-75-5122-01A-01D-1753-08	166	0.126506024096386	3.48379636127876
		LUAD	TCGA-75-5125-01A-01D-1753-08	183	0.180327868852459	5.47453713915234
		LUAD	TCGA-75-5126-01A-01D-1753-08	702	0.190883190883191	4.83259536657716
		LUAD	TCGA-75-5146-01A-01D-1625-08	200	0.055	1.61015798210363
		LUAD	TCGA-75-6211-01A-11D-1753-08	355	0.0535211267605634	0.875557286564768
		LUAD	TCGA-75-6214-01A-41D-1945-08	768	0.194010416666667	3.78342316203014
		LUAD	TCGA-75-7027-01A-11D-1945-08	260	0.0384615384615385	1.1311027147009
		LUAD	TCGA-75-7031-01A-11D-1945-08	221	0.085972850678733	1.52516430562895
		LUAD	TCGA-78-7145-01A-11D-2036-08	180	0.0777777777777778	1.45158181719948
		LUAD	TCGA-78-7146-01A-11D-2036-08	360	0.172222222222222	4.40806886529149
		LUAD	TCGA-78-7147-01A-11D-2036-08	337	0.130563798219585	1.92089022426398
		LUAD	TCGA-78-7148-01A-11D-2036-08	238	0.0546218487394958	2.15663584269637
		LUAD	TCGA-78-7149-01A-11D-2036-08	175	0.331428571428571	9.62191375972229
		LUAD	TCGA-78-7150-01A-21D-2036-08	430	0.22093023255814	3.75238837099186
		LUAD	TCGA-78-7152-01A-11D-2036-08	227	0.3215859030837	11.3534434988102
		LUAD	TCGA-78-7153-01A-11D-2036-08	120	0.175	3.48379636127876
		LUAD	TCGA-78-7154-01A-11D-2036-08	271	0.273062730627306	6.34977661907951
		LUAD	TCGA-78-7155-01A-11D-2036-08	1547	0.0652876535229476	1.60083454271681
		LUAD	TCGA-78-7156-01A-11D-2036-08	374	0.320855614973262	12.9830920296103
		LUAD	TCGA-78-7158-01A-11D-2036-08	231	0.138528138528139	3.18518524459772
		LUAD	TCGA-78-7159-01A-11D-2036-08	315	0.0476190476190476	0.888723561550704
		LUAD	TCGA-78-7161-01A-11D-2036-08	177	0.0677966101694915	1.49305558340518
		LUAD	TCGA-78-7162-01A-21D-2063-08	104	0.134615384615385	2.17737272579922
		LUAD	TCGA-78-7166-01A-12D-2063-08	238	0.046218487394958	1.61015798210363
		LUAD	TCGA-78-7167-01A-11D-2063-08	223	0.165919282511211	4.38436957031681
		LUAD	TCGA-78-7220-01A-11D-2036-08	847	0.110979929161747	2.43658376458485
		LUAD	TCGA-78-7535-01A-11D-2063-08	186	0.043010752688172	0.686462337197785
		LUAD	TCGA-78-7536-01A-11D-2063-08	628	0.0445859872611465	0.774176969173058
		LUAD	TCGA-78-7537-01A-11D-2063-08	144	0.0902777777777778	1.79719653558031
		LUAD	TCGA-78-7539-01A-11D-2063-08	511	0.389432485322896	12.6973530383603
		LUAD	TCGA-78-7542-01A-21D-2063-08	395	0.0810126582278481	1.99074077787358
		LUAD	TCGA-78-7633-01A-11D-2063-08	112	0.0446428571428571	0.654848940089992
		LUAD	TCGA-78-8640-01A-11D-2393-08	787	0.115628970775095	2.46137786394695
		LUAD	TCGA-78-8660-01A-11D-2393-08	278	0.129496402877698	2.79947921888472
		LUAD	TCGA-78-8662-01A-11D-2393-08	1231	0.0617384240454915	1.33183361899993
		LUAD	TCGA-80-5607-01A-31D-1945-08	137	0.547445255474453	15.5526623271373
		LUAD	TCGA-80-5608-01A-31D-1945-08	175	0.0342857142857143	0.878267990238343
		LUAD	TCGA-80-5611-01A-01D-1625-08	226	0.0530973451327434	0.710978849240563
		LUAD	TCGA-83-5908-01A-21D-2284-08	235	0.234042553191489	4.88797958852887
		LUSC	TCGA-85-6560-01A-11D-1817-08	454	0.0748898678414097	1.41010805099378
		LUSC	TCGA-85-6561-01A-11D-1817-08	874	0.0480549199084668	3.48379636127876
		LUAD	TCGA-86-6851-01A-11D-1945-08	987	0.129685916919959	3.21735883292699
		LUAD	TCGA-86-7701-01A-11D-2167-08	213	0.028169014084507	0.597222233362073
		LUAD	TCGA-86-7711-01A-11D-2063-08	249	0.132530120481928	2.64896958346081
		LUAD	TCGA-86-7713-01A-11D-2063-08	164	0.0487804878048781	1.32716051858238
		LUAD	TCGA-86-7954-01A-11D-2184-08	224	0.125	3.48379636127876
		LUAD	TCGA-86-7955-01A-11D-2184-08	340	0.0794117647058823	1.39973960944236
		LUAD	TCGA-86-8054-01A-11D-2238-08	243	0.0617283950617284	1.43563036865883
		LUAD	TCGA-86-8056-01A-11D-2238-08	298	0.352348993288591	14.5158181719948
		LUAD	TCGA-86-8073-01A-11D-2238-08	1738	0.0604142692750288	1.43563036865883
		LUAD	TCGA-86-8278-01A-11D-2284-08	129	0.511627906976744	16.423611417457
		LUAD	TCGA-86-8279-01A-11D-2284-08	555	0.0378378378378378	0.842853958373893
		LUAD	TCGA-86-8281-01A-11D-2284-08	286	0.111888111888112	2.94924559684974
		LUAD	TCGA-86-8358-01A-11D-2323-08	1166	0.0437392795883362	1.04024364417574
		LUAD	TCGA-86-8359-01A-11D-2323-08	168	0.0654761904761905	1.7107928559851
		LUAD	TCGA-86-8585-01A-11D-2393-08	581	0.139414802065404	3.00839557850298
		LUAD	TCGA-86-8669-01A-11D-2393-08	146	0.0410958904109589	1.14850429492706
		LUAD	TCGA-86-8672-01A-21D-2393-08	340	0.117647058823529	2.07368831028498
		LUAD	TCGA-86-8673-01A-11D-2393-08	533	0.0844277673545966	1.69665407205134
		LUAD	TCGA-86-8674-01A-21D-2393-08	336	0.0982142857142857	2.41523697315544
		LUAD	TCGA-86-A456-01A-11D-A24D-08	372	0.0779569892473118	2.32788236122313
		LUAD	TCGA-86-A4D0-01A-11D-A24D-08	252	0.0555555555555556	1.5146940701212
		LUAD	TCGA-86-A4JF-01A-11D-A24P-08	1471	0.0938137321549966	1.98498719181036
		LUAD	TCGA-91-6828-01A-11D-1855-08	323	0.0835913312693498	2.03598488646161
		LUAD	TCGA-91-6829-01A-21D-1855-08	673	0.0757800891530461	1.39461235812572
		LUAD	TCGA-91-6830-01A-11D-1945-08	309	0.56957928802589	17.5185188452875
		LUAD	TCGA-91-6831-01A-11D-1855-08	319	0.0501567398119122	0.812547256274929
		LUAD	TCGA-91-6835-01A-11D-1855-08	108	0.148148148148148	4.97685194468394
		LUAD	TCGA-91-6836-01A-21D-1855-08	508	0.047244094488189	0.963261666713021
		LUAD	TCGA-91-6840-01A-11D-1945-08	118	0.406779661016949	11.9444446672415
		LUAD	TCGA-91-6848-01A-11D-1945-08	679	0.122238586156112	2.26966324949872
		LUAD	TCGA-91-6849-01A-11D-1945-08	112	0.0803571428571429	1.49305558340518
		LUAD	TCGA-91-7771-01A-11D-2167-08	244	0.10655737704918	2.31068126003183
		LUAD	TCGA-91-8499-01A-11D-2393-08	342	0.184210526315789	4.12554832256695
		LUAD	TCGA-91-A4BC-01A-11D-A24D-08	497	0.0583501006036217	1.38777602303687
		LUAD	TCGA-93-7347-01A-11D-2184-08	141	0.113475177304965	2.48842597234197
		LUAD	TCGA-93-7348-01A-21D-2036-08	105	0.0952380952380952	2.48842597234197
		LUAD	TCGA-93-8067-01A-11D-2284-08	579	0.506044905008636	22.7846503092562
		LUAD	TCGA-93-A4JQ-01A-11D-A24P-08	146	0.280821917808219	3.9240563410008
		LUAD	TCGA-95-7039-01A-11D-1945-08	1351	0.0488527017024426	0.971811326476746
		LUAD	TCGA-95-7043-01A-11D-1945-08	1055	0.0511848341232227	1.17872809216199
		LUAD	TCGA-95-7562-01A-11D-2238-08	396	0.0303030303030303	0.710978849240563
		LUAD	TCGA-95-7567-01A-11D-2063-08	1144	0.0384615384615385	1.14052857065674
		LUAD	TCGA-95-7944-01A-11D-2184-08	264	0.507575757575758	20.840567518364
		LUAD	TCGA-95-7947-01A-11D-2184-08	557	0.253141831238779	5.3979701861572
		LUAD	TCGA-95-7948-01A-11D-2184-08	164	0.530487804878049	21.6493059593751
		LUAD	TCGA-95-8039-01A-11D-2238-08	109	0.155963302752294	3.84574922998305
		LUAD	TCGA-95-8494-01A-11D-2323-08	114	0.385964912280702	13.6863428478808
		LUAD	TCGA-95-A4VK-01A-11D-A25L-08	262	0.0419847328244275	0.977595917705774
		LUAD	TCGA-95-A4VN-01A-11D-A25L-08	507	0.0769230769230769	1.61747688202228
		LUAD	TCGA-95-A4VP-01A-21D-A25L-08	138	0.0217391304347826	0.622106493085493
		LUAD	TCGA-97-7546-01A-11D-2036-08	277	0.0469314079422383	1.1155012979464
		LUAD	TCGA-97-7547-01A-11D-2036-08	183	0.213114754098361	6.46990752808912
		LUAD	TCGA-97-7554-01A-11D-2036-08	454	0.052863436123348	1.14850429492706
		LUAD	TCGA-97-7937-01A-11D-2167-08	485	0.0432989690721649	1.21527780044608
		LUAD	TCGA-97-7938-01A-11D-2167-08	386	0.0984455958549223	2.1490951579317
		LUAD	TCGA-97-7941-01A-11D-2184-08	107	0.168224299065421	3.19940482158253
		LUAD	TCGA-97-8172-01A-11D-2284-08	290	0.0275862068965517	0.56878307939245
		LUAD	TCGA-97-8174-01A-11D-2284-08	182	0.0879120879120879	2.09551660828798
		LUAD	TCGA-97-8176-01A-11D-2393-08	177	0.19774011299435	4.58394258062995
		LUAD	TCGA-97-8179-01A-11D-2284-08	185	0.0486486486486487	1.06646827386084
		LUAD	TCGA-97-A4LX-01A-11D-A24P-08	193	0.0466321243523316	1.17872809216199
		LUAD	TCGA-97-A4M0-01A-11D-A24P-08	387	0.13953488372093	3.27743908552357
		LUAD	TCGA-97-A4M3-01A-11D-A24P-08	217	0.115207373271889	2.48842597234197
		LUAD	TCGA-97-A4M5-01A-11D-A24P-08	177	0.491525423728814	11.3943715575659
		LUAD	TCGA-97-A4M7-01A-11D-A24P-08	341	0.0498533724340176	1.32197629780667
		LUAD	TCGA-99-7458-01A-11D-2036-08	451	0.0509977827050998	1.02203209578331
		LUAD	TCGA-99-8025-01A-11D-2238-08	524	0.204198473282443	4.22637427048557
		LUAD	TCGA-99-8028-01A-11D-2238-08	574	0.0383275261324042	0.995370388936788
		LUAD	TCGA-99-8032-01A-11D-2238-08	457	0.0481400437636762	1.05279560368314
		LUAD	TCGA-99-8033-01A-11D-2238-08	204	0.0686274509803922	0.941566584129394
		BRCA	TCGA-A1-A0SI-01A-11D-A142-09	173	0.595375722543353	28.4786527945803
		BRCA	TCGA-A1-A0SK-01A-12D-A099-09	127	0.0708661417322835	1.24421298617099
		BRCA	TCGA-A1-A0SO-01A-22D-A099-09	185	0.0702702702702703	0.898598267790156
		BRCA	TCGA-A2-A04P-01A-31D-A128-09	108	0.0833333333333333	0.82947532411399
		BRCA	TCGA-A2-A04W-01A-31D-A10Y-09	102	0.46078431372549	9.74633505833939
		BRCA	TCGA-A2-A0CR-01A-11D-A228-09	105	0.60952380952381	22.751323175698
		BRCA	TCGA-A2-A0CX-01A-21W-A019-09	183	0.524590163934426	19.9074077787358
		BRCA	TCGA-A2-A0EY-01A-11W-A050-09	173	0.508670520231214	13.6863428478808
		BRCA	TCGA-A2-A0SY-01A-31D-A099-09	118	0.533898305084746	17.4189818063938
		BRCA	TCGA-A2-A0T0-01A-22D-A099-09	155	0.0967741935483871	1.43563036865883
		BRCA	TCGA-A2-A0T5-01A-21D-A099-09	1443	0.000693000693000693	0.82947532411399
		BRCA	TCGA-A2-A0T6-01A-11D-A099-09	126	0.00793650793650794	0.82947532411399
		BRCA	TCGA-A2-A0YK-01A-22D-A117-09	182	0.620879120879121	35.1490168593303
		BRCA	TCGA-A2-A3Y0-01A-11D-A23C-09	172	0.116279069767442	1.15740742899627
		BRCA	TCGA-A2-A4RW-01A-21D-A25Q-09	107	0.336448598130841	7.46527791702591
		KIRC	TCGA-A3-3308-01A-01W-0886-08	125	0.016	0.414737662056995
		KIRC	TCGA-A3-3313-01A-01W-0886-08	161	0.0559006211180124	0.699869804721179
		KIRC	TCGA-A3-3316-01A-01W-0886-08	201	0.0248756218905473	0.388816558178433
		KIRC	TCGA-A3-3319-01A-01W-0886-08	123	0.0650406504065041	0.995370388936788
		KIRC	TCGA-A3-3320-01A-01W-0886-08	129	0.0310077519379845	0.82947532411399
		KIRC	TCGA-A3-3331-01A-01W-0886-08	124	0.0483870967741935	0.710978849240563
		KIRC	TCGA-A3-3346-01A-01W-0886-08	294	0.231292517006803	2.72924138902023
		KIRC	TCGA-A3-3357-01A-02D-1421-08	110	0.0818181818181818	1.11979168755389
		KIRC	TCGA-A3-3363-01A-01W-0886-08	411	0.0267639902676399	0.325865305901925
		KIRC	TCGA-A3-3365-01A-01W-0886-08	140	0.0571428571428571	0.82947532411399
		KIRC	TCGA-A3-3374-01A-01W-0886-08	443	0.0316027088036117	0.414737662056995
		KIRC	TCGA-A3-3380-01A-01W-0886-08	108	0	0
		KIRC	TCGA-A3-3382-01A-01W-0886-08	191	0.0209424083769634	0.343231168598893
		KIRP	TCGA-A4-7583-01A-11D-2136-08	666	0.00750750750750751	0.777633116356866
		KIRP	TCGA-A4-8098-01A-11D-2396-08	137	0.0875912408759124	1.29830920296103
		KIRP	TCGA-A4-8310-01A-11D-2396-08	106	0.0377358490566038	0.663580259291192
		KIRP	TCGA-A4-8516-01A-11D-2396-08	103	0.0388349514563107	1.10596709881865
		KIRP	TCGA-A4-A48D-01A-11D-A25F-10	128	0.109375	1.83357703225198
		KIRP	TCGA-A4-A57E-01A-11D-A26P-10	113	0.0619469026548673	0.916788516125989
		KIRP	TCGA-A4-A5Y1-01A-11D-A28G-10	102	0.0686274509803922	0.87094909031969
		KIRP	TCGA-A4-A6HP-01A-11D-A31X-10	115	0.0260869565217391	0.746527791702591
		UCEC	TCGA-A5-A0G5-01A-11W-A062-09	171	0.157894736842105	2.79947921888472
		UCEC	TCGA-A5-A0G9-01A-11W-A062-09	654	0.0259938837920489	0.475317320559702
		UCEC	TCGA-A5-A0GA-01A-11W-A062-09	361	0.0249307479224377	0.367144815591438
		UCEC	TCGA-A5-A0GB-01A-11W-A062-09	731	0.0109439124487004	0.139212641809341
		UCEC	TCGA-A5-A0GH-01A-21W-A062-09	468	0.00854700854700855	0.122885233202073
		UCEC	TCGA-A5-A0GI-01A-11W-A062-09	211	0.023696682464455	0.296241187183568
		UCEC	TCGA-A5-A0GP-01A-11W-A062-09	1344	0.0349702380952381	2.08850036964415
		UCEC	TCGA-A5-A0GW-01A-11W-A062-09	362	0.00828729281767956	0.135732325764107
		UCEC	TCGA-A5-A0R7-01A-31D-A10B-09	107	0.0560747663551402	0.878267990238343
		UCEC	TCGA-A5-A0VP-01A-21D-A10B-09	1415	0.00848056537102473	0.211780933816338
		UCEC	TCGA-A5-A0VQ-01A-11D-A10B-09	404	0.0222772277227723	0.243432975555193
		COAD	TCGA-A6-2672-01A-01W-0833-10	524	0.00572519083969466	0.114850429492706
		COAD	TCGA-A6-2676-01A-01W-0833-10	669	0.0164424514200299	0.311053246542746
		COAD	TCGA-A6-4105-01A-02D-1771-10	118	0.0593220338983051	1.74189818063938
		COAD	TCGA-A6-5659-01A-01D-1650-10	152	0.0263157894736842	0.82947532411399
		COAD	TCGA-A6-5661-01A-01D-1650-10	824	0.0121359223300971	0.214519480374308
		COAD	TCGA-A6-5665-01A-01D-1650-10	1282	0.0093603744149766	0.231481485799253
		COAD	TCGA-A6-6140-01A-11D-1771-10	310	0.0709677419354839	1.05279560368314
		COAD	TCGA-A6-6141-01A-11D-1771-10	793	0.0403530895334174	1.73107893728137
		COAD	TCGA-A6-6650-01A-11D-1771-10	103	0.0679611650485437	0.916788516125989
		COAD	TCGA-A6-6653-01A-11D-1771-10	823	0.0145808019441069	0.317671400724507
		COAD	TCGA-A6-6654-01A-21D-1835-10	133	0.0300751879699248	1.42195769848113
		COAD	TCGA-A6-6780-01A-11D-1835-10	811	0.0123304562268804	0.282775678675224
		COAD	TCGA-A6-6781-01A-22D-1924-10	1376	0.0065406976744186	0.130969788017998
		COAD	TCGA-A6-6782-01A-11D-1835-10	104	0.0576923076923077	1.14850429492706
		BRCA	TCGA-A7-A0DA-01A-31D-A10Y-09	124	0.0725806451612903	0.658700992678757
		BRCA	TCGA-A7-A26E-01B-06D-A272-09	212	0.0188679245283019	0.585511993492228
		BRCA	TCGA-A7-A26J-01B-02D-A272-09	124	0.0161290322580645	0.622106493085493
		BRCA	TCGA-A7-A3IZ-01A-11D-A20S-09	102	0.294117647058824	6.22106493085493
		BRCA	TCGA-A7-A56D-01A-11D-A27P-09	122	0.442622950819672	9.5982144647476
		BRCA	TCGA-A7-A5ZV-01A-11D-A28B-09	188	0.0957446808510638	2.35745618432397
		BRCA	TCGA-A8-A06Q-01A-11W-A050-09	196	0.510204081632653	22.6220542940179
		BRCA	TCGA-A8-A06X-01A-21W-A019-09	178	0.0674157303370786	1.02969350579668
		BRCA	TCGA-A8-A07C-01A-11D-A045-09	127	0.047244094488189	0.622106493085493
		BRCA	TCGA-A8-A07R-01A-21W-A050-09	370	0.0783783783783784	0.949530963130489
		BRCA	TCGA-A8-A08F-01A-11W-A019-09	110	0.0727272727272727	1.10596709881865
		BRCA	TCGA-A8-A08L-01A-11W-A019-09	188	0.292553191489362	5.26397801841571
		BRCA	TCGA-A8-A08R-01A-11W-A050-09	153	0.111111111111111	2.11516207649068
		BRCA	TCGA-A8-A094-01A-11W-A019-09	173	0.485549132947977	20.9027781676726
		BRCA	TCGA-A8-A095-01A-11W-A019-09	115	0.460869565217391	18.8409395048749
		BRCA	TCGA-A8-A09A-01A-11W-A019-09	103	0.0679611650485437	1.16126545375959
		BRCA	TCGA-A8-A09G-01A-21W-A019-09	217	0.603686635944701	23.2845573126284
		BRCA	TCGA-A8-A09I-01A-22W-A050-09	123	0.276422764227642	9.40072033995856
		BRCA	TCGA-A8-A09Z-01A-11W-A019-09	1069	0.0112254443405051	0.180976434352143
		BRCA	TCGA-A8-A0A6-01A-12W-A071-09	2901	0.00172354360565322	2.48842597234197
		COAD	TCGA-AA-3492-01A-01D-1408-10	1577	0.0196575776791376	0.389602046174753
		COAD	TCGA-AA-3502-01A-01D-1408-10	136	0.0441176470588235	1.35732325764107
		COAD	TCGA-AA-3510-01A-01D-1408-10	2409	0.049813200498132	2.79075809982277
		COAD	TCGA-AA-3516-01A-02W-0833-10	796	0.0163316582914573	0.308090834670911
		COAD	TCGA-AA-3518-01A-02W-0833-10	462	0.00649350649350649	0.124421298617099
		COAD	TCGA-AA-3525-01A-02W-0833-10	538	0.0241635687732342	0.468833878847038
		COAD	TCGA-AA-3542-01A-02W-0831-10	174	0.0402298850574713	0.87094909031969
		COAD	TCGA-AA-3543-01A-01W-0833-10	196	0.0204081632653061	0.552983549409327
		COAD	TCGA-AA-3554-01A-01W-0833-10	268	0.00746268656716418	0.452441085880358
		COAD	TCGA-AA-3555-01A-01W-0831-10	660	0.0545454545454545	3.31790129645596
		COAD	TCGA-AA-3558-01A-01W-0831-10	116	0.0344827586206897	1.10596709881865
		COAD	TCGA-AA-3662-01A-01D-1719-10	210	0.0285714285714286	0.597222233362073
		COAD	TCGA-AA-3663-01A-01D-1719-10	1923	0.0093603744149766	0.201764268027727
		COAD	TCGA-AA-3697-01A-01D-1719-10	366	0.0573770491803279	1.45158181719948
		COAD	TCGA-AA-3712-01A-21D-1719-10	281	0.160142348754448	3.99925602697817
		COAD	TCGA-AA-3713-01A-21D-1719-10	965	0.0207253886010363	0.502712317644843
		COAD	TCGA-AA-A00A-01A-01W-A005-10	364	0.0247252747252747	1.31740198535751
		COAD	TCGA-AA-A00E-01A-01W-A005-10	569	0.015817223198594	0.283491566469338
		COAD	TCGA-AA-A00J-01A-02W-A005-10	895	0.0256983240223464	0.414737662056995
		COAD	TCGA-AA-A00K-01A-02W-A005-10	124	0.032258064516129	0.473985899493709
		COAD	TCGA-AA-A00R-01A-01W-A005-10	382	0.00523560209424084	0.118496474873427
		COAD	TCGA-AA-A01Q-01A-01W-A005-10	660	0.0136363636363636	0.574252147463532
		BRCA	TCGA-AC-A23H-01A-11D-A159-09	4254	0.674659144334744	42.7651649139009
		BRCA	TCGA-AC-A3BB-01A-21D-A19Y-09	107	0.242990654205607	9.24272504012732
		BRCA	TCGA-AC-A3TN-01A-11D-A228-09	162	0.0308641975308642	0.497685194468394
		BRCA	TCGA-AC-A3W5-01A-11D-A228-09	145	0.2	3.60821765989586
		BRCA	TCGA-AC-A3W6-01A-12D-A228-09	223	0.390134529147982	10.8246529796876
		BRCA	TCGA-AC-A5EH-01A-11D-A28B-09	141	0.113475177304965	1.53133905990275
		BRCA	TCGA-AC-A5XS-01A-11D-A29N-09	488	0.569672131147541	20.9631036457899
		COAD	TCGA-AD-5900-01A-11D-1650-10	1078	0.0176252319109462	0.345110171346697
		COAD	TCGA-AD-6889-01A-11D-1924-10	1355	0.0154981549815498	0.262597715674278
		COAD	TCGA-AD-6895-01A-11D-1924-10	1372	0.0422740524781341	0.854016014176534
		COAD	TCGA-AD-6899-01A-11D-1924-10	129	0.0775193798449612	2.48842597234197
		COAD	TCGA-AD-6901-01A-11D-1924-10	205	0.0731707317073171	1.69665407205134
		COAD	TCGA-AD-6964-01A-11D-1924-10	1079	0.0222428174235403	0.312681797571766
		COAD	TCGA-AD-6965-01A-11D-1924-10	101	0.0396039603960396	1.65895064822798
		READ	TCGA-AF-6136-01A-11D-1826-10	132	0.0378787878787879	1.1311027147009
		READ	TCGA-AG-3592-01A-02D-1733-10	211	0.0616113744075829	1.61747688202228
		READ	TCGA-AG-3731-01A-11D-1733-10	112	0.116071428571429	1.70260724423398
		READ	TCGA-AG-3742-01A-11D-1657-10	110	0.0363636363636364	0.523879152071994
		READ	TCGA-AG-4021-01A-01D-1733-10	112	0.0357142857142857	0.82947532411399
		READ	TCGA-AG-A002-01A-01W-A005-10	6169	0.0317717620359864	2.48842597234197
		READ	TCGA-AG-A00Y-01A-02W-A005-10	107	0.130841121495327	2.48842597234197
		READ	TCGA-AH-6544-01A-11D-1826-10	123	0.0650406504065041	1.65895064822798
		READ	TCGA-AH-6644-01A-21D-1826-10	139	0.0359712230215827	1.03684415514249
		READ	TCGA-AH-6897-01A-11D-1924-10	105	0.0761904761904762	1.99074077787358
		KIRC	TCGA-AK-3427-01A-01W-0886-08	101	0.0099009900990099	0.248842597234197
		KIRC	TCGA-AK-3444-01A-01D-0966-08	101	0.099009900990099	1.30969788017998
		KIRC	TCGA-AK-3444-01A-01W-0886-08	137	0	0
		KIRC	TCGA-AK-3445-01A-02D-1361-10	101	0.0594059405940594	0.933159739628239
		KIRC	TCGA-AK-3447-01A-01W-0886-08	126	0.0793650793650794	2.48842597234197
		KIRC	TCGA-AK-3465-01A-01W-0886-08	110	0.0545454545454545	0.785818728107991
		KIRP	TCGA-AL-3468-01A-01D-1252-08	119	0.092436974789916	2.28105714131347
		COAD	TCGA-AM-5820-01A-01D-1650-10	4759	0.0481193528052112	0.800350488295381
		COAD	TCGA-AM-5821-01A-01D-1650-10	3459	0.0445215380167679	0.668791622584055
		BRCA	TCGA-AN-A046-01A-21W-A050-09	4640	0.0480603448275862	3.03234421766262
		BRCA	TCGA-AN-A0AK-01A-21W-A019-09	872	0.0240825688073395	0.316708760116251
		BRCA	TCGA-AN-A0AR-01A-11W-A019-09	112	0.116071428571429	1.70260724423398
		BRCA	TCGA-AN-A0AT-01A-11D-A045-09	102	0.0686274509803922	0.916788516125989
		BRCA	TCGA-AN-A0FL-01A-11W-A050-09	143	0.13986013986014	2.48842597234197
		BRCA	TCGA-AN-A0XN-01A-21D-A10G-09	115	0.0608695652173913	0.82947532411399
		BRCA	TCGA-AN-A0XW-01A-11D-A10G-09	213	0.685446009389671	40.3677991068809
		BRCA	TCGA-AO-A03M-01B-11D-A10M-09	698	0.694842406876791	60.3443298292928
		BRCA	TCGA-AO-A03N-01B-11D-A10M-09	103	0.436893203883495	27.9947921888472
		BRCA	TCGA-AO-A124-01A-11D-A10M-09	134	0.0373134328358209	0.444361780775352
		BRCA	TCGA-AO-A128-01A-11D-A10M-09	820	0.0341463414634146	0.800872726730749
		BRCA	TCGA-AO-A12E-01A-11D-A10M-09	518	0.0579150579150579	0.769616280105764
		UCEC	TCGA-AP-A051-01A-21W-A027-09	8245	0.0134627046694967	0.229605388969209
		UCEC	TCGA-AP-A054-01A-11W-A062-09	1025	0.00682926829268293	0.305596172041996
		UCEC	TCGA-AP-A056-01A-11W-A027-09	7949	0.0328343187822368	2.0170160831716
		UCEC	TCGA-AP-A059-01A-21D-A122-09	11355	0.0343461030383091	0.472716088267593
		UCEC	TCGA-AP-A05N-01A-11W-A027-09	339	0.023598820058997	0.355489424620282
		UCEC	TCGA-AP-A0LD-01A-11W-A062-09	500	0.02	0.469514334404145
		UCEC	TCGA-AP-A0LE-01A-11D-A127-09	579	0.0103626943005181	0.140854300321244
		UCEC	TCGA-AP-A0LF-01A-11D-A122-09	303	0.303630363036304	8.47908109094301
		UCEC	TCGA-AP-A0LG-01A-11W-A062-09	473	0.0211416490486258	0.273453403554063
		UCEC	TCGA-AP-A0LI-01A-11W-A062-09	127	0.283464566929134	5.26960794143006
		UCEC	TCGA-AP-A0LM-01A-11D-A122-09	12597	0.0336588076526157	1.3993270719801
		UCEC	TCGA-AP-A0LP-01A-12D-A10B-09	327	0.018348623853211	0.240815416678255
		UCEC	TCGA-AP-A0LT-01A-11W-A062-09	681	0.0234948604992658	0.282374578421784
		BRCA	TCGA-AR-A0TX-01A-11D-A099-09	262	0.622137404580153	25.3508395932338
		BRCA	TCGA-AR-A0U4-01A-11D-A117-09	124	0.185483870967742	2.38474155682772
		BRCA	TCGA-AR-A24H-01A-11D-A167-09	127	0.125984251968504	1.73107893728137
		BRCA	TCGA-AR-A24Q-01A-12D-A167-09	148	0.168918918918919	2.30409812253886
		BRCA	TCGA-AR-A251-01A-12D-A167-09	144	0.131944444444444	1.8912037389799
		BRCA	TCGA-AR-A256-01A-11D-A167-09	191	0.136125654450262	1.70260724423398
		BRCA	TCGA-AR-A2LE-01A-11D-A17W-09	279	0.620071684587814	28.6998462143441
		KIRC	TCGA-AS-3777-01A-01W-0886-08	133	0.0300751879699248	0.311053246542746
		COAD	TCGA-AU-6004-01A-11D-1719-10	886	0.00564334085778781	0.130969788017998
		UCEC	TCGA-AX-A05S-01A-11W-A027-09	445	0.0337078651685393	0.455199872989385
		UCEC	TCGA-AX-A05Y-01A-11W-A027-09	150	0.0266666666666667	0.585511993492228
		UCEC	TCGA-AX-A05Z-01A-11W-A027-09	6139	0.0371395992832709	2.83680560846985
		UCEC	TCGA-AX-A060-01A-11W-A027-09	608	0.0131578947368421	0.203136814068732
		UCEC	TCGA-AX-A063-01A-11W-A027-09	880	0.0204545454545455	0.34722222869888
		UCEC	TCGA-AX-A064-01A-11W-A027-09	309	0.00970873786407767	0.143563036865883
		UCEC	TCGA-AX-A06H-01A-11D-A122-09	473	0.0169133192389006	0.234204797396891
		UCEC	TCGA-AX-A0J0-01A-11D-A117-09	7366	0.0240293239207168	2.1485434005099
		UCEC	TCGA-AX-A0J1-01A-11W-A062-09	4777	0.0129788570232363	0.193822123473872
		COAD	TCGA-AY-6196-01A-11D-1719-10	236	0.0466101694915254	0.82947532411399
		COAD	TCGA-AY-6197-01A-11D-1719-10	1067	0.0103092783505155	0.233954578596254
		COAD	TCGA-AY-6386-01A-21D-1719-10	266	0.0150375939849624	0.321087222237674
		COAD	TCGA-AZ-4315-01A-01D-1408-10	5150	0.0411650485436893	1.58422314155104
		COAD	TCGA-AZ-4615-01A-01D-1408-10	1124	0.0097864768683274	0.201269747762954
		COAD	TCGA-AZ-5407-01A-01D-1719-10	134	0.0149253731343284	0.382834764975688
		COAD	TCGA-AZ-6598-01A-11D-1771-10	1769	0.0141322781232335	0.274055723826208
		COAD	TCGA-AZ-6599-01A-11D-1771-10	218	0.178899082568807	2.42621532303342
		COAD	TCGA-AZ-6600-01A-11D-1771-10	107	0.0467289719626168	1.24421298617099
		COAD	TCGA-AZ-6601-01A-11D-1771-10	1575	0.00825396825396825	0.200928805220159
		KIRC	TCGA-B0-4712-01A-01D-1501-10	103	0.106796116504854	1.3034612236077
		KIRC	TCGA-B0-4811-01A-01D-1501-10	101	0.0396039603960396	0.765669529951376
		KIRC	TCGA-B0-4823-01A-02D-1421-08	126	0.0476190476190476	0.678661628820537
		KIRC	TCGA-B0-4827-01A-02D-1421-08	105	0.0285714285714286	0.339330814410269
		KIRC	TCGA-B0-5075-01A-01D-1462-08	101	0.0396039603960396	0.432769734320343
		KIRC	TCGA-B0-5092-01A-01D-1421-08	102	0.0882352941176471	1.7227564423906
		KIRC	TCGA-B0-5094-01A-01D-1421-08	103	0.0679611650485437	1.0246459886114
		KIRC	TCGA-B0-5096-01A-01D-1421-08	109	0.0458715596330275	0.592482374367136
		KIRC	TCGA-B0-5098-01A-01D-1421-08	665	0.0315789473684211	0.580632726879793
		KIRC	TCGA-B0-5701-01A-11D-1534-10	101	0.0297029702970297	0.392909364053995
		KIRC	TCGA-B0-5713-01A-11D-1669-08	102	0.0588235294117647	1.86631947925648
		KIRP	TCGA-B1-5398-01A-02D-1589-08	123	0.040650406504065	0.888723561550704
		KIRP	TCGA-B1-A47M-01A-11D-A25F-10	109	0.0458715596330275	0.592482374367136
		KIRP	TCGA-B1-A656-01A-11D-A31X-10	136	0.0147058823529412	0.236992949746854
		UCEC	TCGA-B5-A0JN-01A-11D-A10B-09	200	0.14	2.0492919772228
		UCEC	TCGA-B5-A0JR-01A-13W-A062-09	693	0.0245310245310245	0.406761937786668
		UCEC	TCGA-B5-A0JV-01A-11D-A10B-09	572	0.0157342657342657	0.29085498378023
		UCEC	TCGA-B5-A0JY-01A-11D-A10B-09	9865	0.0364926507856057	2.08818962714012
		UCEC	TCGA-B5-A0JZ-01A-11W-A062-09	556	0.0161870503597122	0.191417382487844
		UCEC	TCGA-B5-A0K2-01A-12W-A10C-09	408	0.0318627450980392	0.475728494712436
		UCEC	TCGA-B5-A0K6-01A-11W-A062-09	488	0.0225409836065574	0.265754230055939
		UCEC	TCGA-B5-A0K9-01A-21D-A10O-09	1048	0.0209923664122137	0.382834764975688
		UCEC	TCGA-B5-A11E-01A-11D-A10M-09	10011	0.0325641794026571	0.738150015453578
		UCEC	TCGA-B5-A11G-01A-13D-A122-09	478	0.0167364016736402	0.622106493085493
		UCEC	TCGA-B5-A11H-01A-11D-A122-09	856	0.00700934579439252	0.112259818301142
		UCEC	TCGA-B5-A11J-01A-11D-A122-09	371	0.032345013477089	0.432769734320343
		UCEC	TCGA-B5-A11N-01A-11D-A122-09	1610	0.0347826086956522	2.53367008093001
		UCEC	TCGA-B5-A11O-01A-11D-A122-09	297	0	0
		UCEC	TCGA-B5-A11R-01A-11D-A122-09	650	0.666153846153846	33.6715139382523
		UCEC	TCGA-B5-A11U-01A-11D-A122-09	283	0.0176678445229682	0.230409812253886
		UCEC	TCGA-B5-A11Y-01A-21D-A10M-09	1042	0.00287907869481766	0.0888723561550704
		BRCA	TCGA-B6-A0I6-01A-11D-A128-09	108	0.0925925925925926	1.38245887352332
		BRCA	TCGA-B6-A0IJ-01A-11W-A050-09	127	0.165354330708661	2.48842597234197
		BRCA	TCGA-B6-A0IK-01A-12W-A071-09	123	0.48780487804878	16.5895064822798
		BRCA	TCGA-B6-A0RS-01A-11D-A099-09	103	0.116504854368932	1.42195769848113
		BRCA	TCGA-B6-A400-01A-11D-A23C-09	111	0.0720720720720721	0.82947532411399
		STAD	TCGA-B7-5816-01A-21D-1600-08	1291	0.0154918667699458	0.360641445266952
		STAD	TCGA-B7-5818-01A-11D-1600-08	441	0.0884353741496599	1.47043352911116
		STAD	TCGA-B7-A5TI-01A-11D-A31L-08	650	0.0215384615384615	0.561902638915929
		STAD	TCGA-B7-A5TJ-01A-11D-A31L-08	348	0.0316091954022989	0.739802316101667
		STAD	TCGA-B7-A5TN-01A-21D-A31L-08	122	0.0491803278688525	1.14850429492706
		KIRP	TCGA-B9-4114-01A-01D-1252-08	122	0.0819672131147541	1.77744712310141
		KIRP	TCGA-B9-4116-01A-01D-1252-08	115	0.0521739130434783	1.06646827386084
		KIRP	TCGA-B9-4117-01A-01D-1252-08	304	0.0625	1.47750292107805
		KIRP	TCGA-B9-5155-01A-01D-1589-08	128	0.0625	0.796296311149431
		KIRP	TCGA-B9-5156-01A-01D-1589-08	102	0.0686274509803922	1.74189818063938
		KIRP	TCGA-B9-A44B-01A-11D-A25F-10	142	0.0704225352112676	2.07368831028498
		HNSC	TCGA-BA-4074-01A-01D-1434-08	153	0.0980392156862745	1.09783498779793
		HNSC	TCGA-BA-4075-01A-01D-1434-08	192	0.0729166666666667	1.05569586705417
		HNSC	TCGA-BA-4076-01A-01D-1434-08	351	0.0655270655270655	1.36270946104441
		HNSC	TCGA-BA-4077-01B-01D-1434-08	331	0.540785498489426	18.5595103770505
		HNSC	TCGA-BA-4078-01A-01D-1434-08	462	0.0649350649350649	1.18496474873427
		HNSC	TCGA-BA-5149-01A-01D-1512-08	125	0.176	6.0828190435026
		HNSC	TCGA-BA-5152-01A-02D-1870-08	549	0.595628415300546	29.061260462708
		HNSC	TCGA-BA-5555-01A-01D-1512-08	152	0.0657894736842105	1.08192433580086
		HNSC	TCGA-BA-5556-01A-01D-1512-08	142	0.0774647887323944	1.24421298617099
		HNSC	TCGA-BA-5558-01A-01D-1512-08	166	0.469879518072289	17.645202349334
		HNSC	TCGA-BA-6868-01B-12D-1912-08	156	0.185897435897436	3.13758057382248
		HNSC	TCGA-BA-6869-01A-11D-1870-08	495	0.0848484848484849	1.65895064822798
		HNSC	TCGA-BA-6871-01A-11D-1870-08	142	0.302816901408451	5.09534841955737
		HNSC	TCGA-BA-6872-01A-11D-1870-08	179	0.223463687150838	6.22106493085493
		HNSC	TCGA-BA-A4IF-01A-11D-A25Y-08	106	0.169811320754717	2.98611116681036
		HNSC	TCGA-BA-A4IG-01A-11D-A25Y-08	132	0.212121212121212	4.64506181503835
		HNSC	TCGA-BA-A4II-01A-11D-A25Y-08	111	0.117117117117117	6.46990752808912
		HNSC	TCGA-BA-A6D8-01A-31D-A31L-08	125	0.08	1.46377998373057
		HNSC	TCGA-BA-A6DA-01A-31D-A31L-08	710	0.0647887323943662	1.16803668089521
		HNSC	TCGA-BA-A6DE-01A-22D-A31L-08	125	0.224	8.7094909031969
		HNSC	TCGA-BA-A6DF-01A-11D-A30E-08	157	0.101910828025478	1.89594359797483
		HNSC	TCGA-BA-A6DI-01A-11D-A30E-08	114	0.105263157894737	2.13293654772169
		HNSC	TCGA-BA-A6DJ-01A-11D-A30E-08	319	0.329153605015674	10.0494125806118
		HNSC	TCGA-BA-A6DL-01A-21D-A30E-08	109	0.110091743119266	1.99074077787358
		HNSC	TCGA-BB-4223-01A-01D-1434-08	335	0.614925373134328	34.1743833534964
		HNSC	TCGA-BB-4227-01A-01D-1870-08	279	0.541218637992832	28.9040247556644
		HNSC	TCGA-BB-7862-01A-21D-2229-08	407	0.058968058968059	0.904882171760717
		HNSC	TCGA-BB-7870-01A-11D-2229-08	289	0.055363321799308	0.925925943197012
		HNSC	TCGA-BB-7871-01A-11D-2229-08	461	0.154013015184382	3.5335648807256
		HNSC	TCGA-BB-A5HU-01A-11D-A28R-08	195	0.497435897435897	18.5674861013209
		HNSC	TCGA-BB-A5HY-01A-11D-A28R-08	221	0.239819004524887	5.07256063592786
		HNSC	TCGA-BB-A6UO-01A-12D-A34J-08	105	0.0761904761904762	2.21193419763731
		LIHC	TCGA-BC-4073-01B-02D-A12Z-10	359	0.0417827298050139	1.33308534232606
		LIHC	TCGA-BC-A10Q-01A-11D-A12Z-10	486	0.0123456790123457	0.710978849240563
		LIHC	TCGA-BC-A10R-01A-11D-A12Z-10	624	0.0224358974358974	0.552983549409327
		LIHC	TCGA-BC-A10S-01A-22D-A12Z-10	4599	0.0437051532941944	0.666898160587648
		LIHC	TCGA-BC-A10T-01A-11D-A12Z-10	295	0.0305084745762712	2.23958337510777
		LIHC	TCGA-BC-A10U-01A-11D-A12Z-10	180	0.0555555555555556	1.03684415514249
		LIHC	TCGA-BC-A10W-01A-11D-A12Z-10	643	0.0186625194401244	0.50612053674752
		LIHC	TCGA-BC-A10X-01A-11D-A12Z-10	165	0	0
		LIHC	TCGA-BC-A10Y-01A-11D-A12Z-10	598	0.0183946488294314	0.622106493085493
		LIHC	TCGA-BC-A10Z-01A-11D-A12Z-10	374	0.0374331550802139	0.893281118276605
		LIHC	TCGA-BC-A110-01A-11D-A12Z-10	436	0.0298165137614679	0.789013113181601
		LIHC	TCGA-BC-A112-01A-11D-A12Z-10	437	0.0709382151029748	1.79398151494421
		LIHC	TCGA-BC-A216-01A-11D-A152-10	291	0.0171821305841924	0.592482374367136
		LIHC	TCGA-BC-A217-01A-11D-A152-10	271	0.033210332103321	1.49305558340518
		LIHC	TCGA-BC-A3KF-01A-11D-A20W-10	232	0.0301724137931034	1.24421298617099
		LIHC	TCGA-BC-A3KG-01A-11D-A20W-10	256	0.015625	1.24421298617099
		LIHC	TCGA-BC-A5W4-01A-11D-A28X-10	113	0.0619469026548673	1.24421298617099
		LIHC	TCGA-BC-A69H-01A-11D-A30V-10	141	0.0425531914893617	0.82947532411399
		LIHC	TCGA-BC-A69I-01A-11D-A30V-10	898	0.0645879732739421	0.925184015357912
		LIHC	TCGA-BD-A2L6-01A-11D-A20W-10	157	0.0382165605095541	1.24421298617099
		LIHC	TCGA-BD-A3EP-01A-11D-A22F-10	162	0.037037037037037	0.878267990238343
		LIHC	TCGA-BD-A3ER-01A-11D-A20W-10	230	0.0434782608695652	1.46377998373057
		SKCM	TCGA-BF-A1PV-01A-11D-A19A-08	314	0.14968152866242	2.48842597234197
		SKCM	TCGA-BF-A1PX-01A-12D-A19A-08	457	0.155361050328228	1.80283922486
		SKCM	TCGA-BF-A1PZ-01A-11D-A19A-08	286	0.0944055944055944	1.08366937505215
		SKCM	TCGA-BF-A1Q0-01A-21D-A19A-08	813	0.169741697416974	2.52502047193523
		SKCM	TCGA-BF-A3DJ-01A-11D-A20D-08	151	0.125827814569536	1.8912037389799
		SKCM	TCGA-BF-A3DL-01A-11D-A20D-08	466	0.197424892703863	2.89791379057546
		SKCM	TCGA-BF-A3DM-01A-11D-A20D-08	534	0.168539325842697	2.17435279136677
		SKCM	TCGA-BF-A5EO-01A-12D-A27K-08	711	0.181434599156118	2.67505792026762
		SKCM	TCGA-BF-A5EP-01A-12D-A27K-08	176	0.153409090909091	2.23958337510777
		SKCM	TCGA-BF-A5EQ-01A-21D-A27K-08	687	0.179039301310044	2.5088229065415
		SKCM	TCGA-BF-A5ER-01A-12D-A27K-08	223	0.165919282511211	2.79005336292888
		SKCM	TCGA-BF-A5ES-01A-11D-A27K-08	561	0.169340463458111	2.25143302259512
		UCEC	TCGA-BG-A0LX-01A-11W-A062-09	556	0.0323741007194245	0.52083334304832
		UCEC	TCGA-BG-A0M0-01A-11W-A10C-09	174	0.028735632183908	0.497685194468394
		UCEC	TCGA-BG-A0M4-01A-11W-A10C-09	801	0.00499375780274657	0.110596709881865
		UCEC	TCGA-BG-A0M8-01A-12D-A10B-09	117	0.0598290598290598	1.33992167741491
		UCEC	TCGA-BG-A0MG-01A-21D-A10B-09	137	0.072992700729927	1.46377998373057
		UCEC	TCGA-BG-A0MQ-01A-11D-A10B-09	639	0.0172143974960876	0.231971912675946
		UCEC	TCGA-BG-A0VW-01A-11D-A122-09	273	0.0183150183150183	0.222180890387676
		UCEC	TCGA-BG-A0VX-01A-11D-A122-09	196	0.0306122448979592	0.995370388936788
		UCEC	TCGA-BG-A0VZ-01A-11D-A10G-09	378	0.0185185185185185	0.316708760116251
		UCEC	TCGA-BG-A18B-01A-11D-A12J-09	384	0.0208333333333333	0.236992949746854
		BRCA	TCGA-BH-A0AW-01A-11W-A071-09	133	0.315789473684211	4.75063140174376
		BRCA	TCGA-BH-A0B6-01A-11D-A19Y-09	729	0.654320987654321	28.9507119221249
		BRCA	TCGA-BH-A0BP-01A-11D-A10Y-09	128	0.203125	4.31327168539275
		BRCA	TCGA-BH-A0BZ-01A-31D-A12Q-09	203	0.113300492610837	1.33101854334571
		BRCA	TCGA-BH-A0DZ-01A-11W-A019-09	235	0.668085106382979	39.0682877657689
		BRCA	TCGA-BH-A0HA-01A-11D-A12Q-09	210	0.0285714285714286	0.746527791702591
		BRCA	TCGA-BH-A0HF-01A-11W-A071-09	842	0.155581947743468	0.895559896639555
		BRCA	TCGA-BH-A0HP-01A-12D-A099-09	212	0.641509433962264	42.3032415298135
		BRCA	TCGA-BH-A0W7-01A-11D-A10Y-09	157	0.668789808917197	29.0316363439897
		BRCA	TCGA-BH-A18G-01A-11D-A12B-09	1111	0.009000900090009	0.13307090761187
		BRCA	TCGA-BH-A18P-01A-11D-A12B-09	281	0.601423487544484	24.7378817250467
		BRCA	TCGA-BH-A18V-01A-11D-A12B-09	176	0.267045454545455	3.77277486129267
		BRCA	TCGA-BH-A1F8-01A-11D-A13L-09	137	0.474452554744526	16.1747688202228
		BRCA	TCGA-BH-A1FN-01A-11D-A13L-09	113	0.371681415929204	6.96759272255752
		BRCA	TCGA-BH-A2L8-01A-11D-A18P-09	368	0.717391304347826	46.9246040498772
		CESC	TCGA-BI-A0VR-01A-11D-A10S-08	151	0.410596026490066	10.2854940190135
		CESC	TCGA-BI-A0VS-01A-11D-A10S-08	144	0.326388888888889	6.49755670555959
		UCEC	TCGA-BK-A0C9-01A-11W-A027-09	771	0.169909208819715	2.5668015935181
		BLCA	TCGA-BL-A0C8-01A-11D-A10S-08	163	0.251533742331288	6.3765915541263
		BLCA	TCGA-BL-A13I-01A-11D-A13W-08	104	0.403846153846154	10.4513890838363
		BLCA	TCGA-BL-A13J-01A-11D-A10S-08	127	0.291338582677165	10.2301956640725
		BLCA	TCGA-BL-A3JM-01A-12D-A21A-08	224	0.330357142857143	9.69176431333189
		BLCA	TCGA-BL-A5ZZ-01A-31D-A30E-08	170	0.305882352941176	7.18878614232125
		READ	TCGA-BM-6198-01A-11D-1733-10	119	0.092436974789916	1.36863428478808
		KIRC	TCGA-BP-4782-01A-02D-1421-08	102	0.0686274509803922	1.16126545375959
		KIRC	TCGA-BP-5168-01A-01D-1421-08	134	0.082089552238806	1.61015798210363
		KIRC	TCGA-BP-5176-01A-01D-1429-08	118	0.0677966101694915	1.80976434352143
		KIRP	TCGA-BQ-5878-01A-11D-1589-08	114	0.228070175438596	3.08090834670911
		KIRP	TCGA-BQ-5885-01A-11D-1589-08	131	0.083969465648855	1.52070476087565
		KIRP	TCGA-BQ-5890-01A-11D-1589-08	109	0.0458715596330275	0.95708691243922
		KIRP	TCGA-BQ-7044-01A-11D-1961-08	593	0.0118043844856661	1.08868636289961
		KIRP	TCGA-BQ-7045-01A-31D-1961-08	121	0.0330578512396694	0.552983549409327
		KIRP	TCGA-BQ-7046-01A-11D-1961-08	157	0.00636942675159236	0.355489424620282
		KIRP	TCGA-BQ-7048-01A-11D-1961-08	347	0.00864553314121038	0.622106493085493
		KIRP	TCGA-BQ-7049-01A-11D-1961-08	456	0	0
		KIRP	TCGA-BQ-7051-01A-12D-1961-08	192	0.046875	2.03598488646161
		KIRP	TCGA-BQ-7053-01A-11D-1961-08	247	0.0121457489878543	0.933159739628239
		KIRP	TCGA-BQ-7056-01A-11D-1961-08	262	0.00763358778625954	0.82947532411399
		KIRP	TCGA-BQ-7059-01A-11D-1961-08	367	0.0245231607629428	2.03598488646161
		KIRP	TCGA-BQ-7060-01A-11D-1961-08	525	0.00761904761904762	2.48842597234197
		KIRP	TCGA-BQ-7061-01A-11D-1961-08	136	0.0147058823529412	0.248842597234197
		STAD	TCGA-BR-4184-01A-01D-1126-08	3947	0.00912085127945275	0.179525721451525
		STAD	TCGA-BR-4191-01A-02D-1126-08	223	0.116591928251121	1.54045417335455
		STAD	TCGA-BR-4201-01A-01D-1126-08	1294	0.0115919629057187	0.194408279089216
		STAD	TCGA-BR-4256-01A-01D-1126-08	1016	0.0196850393700787	0.404622109323898
		STAD	TCGA-BR-4257-01A-01D-1126-08	1093	0.00914913083257091	0.176484111513615
		STAD	TCGA-BR-4280-01A-01D-1126-08	672	0.0133928571428571	0.324577300740257
		STAD	TCGA-BR-4292-01A-01D-1126-08	1243	0.00724054706355591	0.240815416678255
		STAD	TCGA-BR-4357-01A-01D-1158-08	269	0.12639405204461	3.38425932238508
		STAD	TCGA-BR-4361-01A-01D-1158-08	2929	0.0201433936497098	0.450359301742872
		STAD	TCGA-BR-4362-01A-01D-1158-08	1645	0.00972644376899696	0.274584934879114
		STAD	TCGA-BR-4363-01A-01D-1158-08	479	0.00208768267223382	0.0414737662056995
		STAD	TCGA-BR-4366-01A-01D-1158-08	155	0.0774193548387097	1.57163745621598
		STAD	TCGA-BR-4368-01A-01D-1158-08	1315	0.0197718631178707	0.363477951016243
		STAD	TCGA-BR-4369-01A-01D-1158-08	189	0.0793650793650794	1.96454682026998
		STAD	TCGA-BR-4370-01A-01D-1158-08	1056	0.0170454545454545	0.370179070265748
		STAD	TCGA-BR-4371-01A-01D-1158-08	179	0.0614525139664804	2.73726856957617
		STAD	TCGA-BR-6452-01A-12D-1800-08	7960	0.0239949748743719	0.561144463656808
		STAD	TCGA-BR-6453-01A-11D-1800-08	200	0.045	1.49305558340518
		STAD	TCGA-BR-6454-01A-11D-1800-08	160	0.1	1.80976434352143
		STAD	TCGA-BR-6455-01A-11D-1800-08	106	0.0471698113207547	0.95708691243922
		STAD	TCGA-BR-6457-01A-21D-1800-08	136	0.0441176470588235	1.06646827386084
		STAD	TCGA-BR-6458-01A-11D-1800-08	329	0.0303951367781155	0.921639249015545
		STAD	TCGA-BR-6565-01A-11D-1800-08	162	0.0740740740740741	1.02969350579668
		STAD	TCGA-BR-6566-01A-11D-1800-08	947	0.0105596620908131	0.232563174985231
		STAD	TCGA-BR-6705-01A-12D-1882-08	109	0.073394495412844	1.32716051858238
		STAD	TCGA-BR-6706-01A-11D-1882-08	237	0.029535864978903	1.24421298617099
		STAD	TCGA-BR-6802-01A-11D-1882-08	468	0.0106837606837607	0.259211038785622
		STAD	TCGA-BR-6852-01A-11D-1882-08	1088	0.0101102941176471	0.25823288392228
		STAD	TCGA-BR-7197-01A-11D-2201-08	188	0.0691489361702128	2.94086705822233
		STAD	TCGA-BR-7703-01A-11D-2053-08	741	0.0215924426450742	0.410462016056408
		STAD	TCGA-BR-7704-01A-11D-2053-08	379	0.0949868073878628	2.08333337219328
		STAD	TCGA-BR-7707-01A-11D-2053-08	1432	0.0153631284916201	0.380176190218912
		STAD	TCGA-BR-7715-01A-11D-2053-08	148	0.0202702702702703	0.46657986981412
		STAD	TCGA-BR-7716-01A-21D-2053-08	185	0.297297297297297	11.4052857065674
		STAD	TCGA-BR-7717-01A-11D-2053-08	150	0.06	1.39973960944236
		STAD	TCGA-BR-7723-01A-11D-2053-08	184	0.0380434782608696	1.08868636289961
		STAD	TCGA-BR-7851-01A-11D-2201-08	1438	0.0111265646731572	0.251992503528301
		STAD	TCGA-BR-7901-01A-11D-2201-08	215	0.0883720930232558	2.05565623802163
		STAD	TCGA-BR-7958-01A-21D-2340-08	173	0.0751445086705202	1.24421298617099
		STAD	TCGA-BR-7959-01A-11D-2340-08	107	0.0841121495327103	1.11979168755389
		STAD	TCGA-BR-8059-01A-11D-2340-08	707	0.0282885431400283	0.469514334404145
		STAD	TCGA-BR-8077-01A-11D-2340-08	128	0.0703125	1.7227564423906
		STAD	TCGA-BR-8078-01A-11D-2340-08	1273	0.011783189316575	0.287126073731766
		STAD	TCGA-BR-8080-01A-11D-2340-08	171	0.0292397660818713	0.654848940089992
		STAD	TCGA-BR-8081-01A-11D-2340-08	849	0.0106007067137809	0.23825355054338
		STAD	TCGA-BR-8284-01A-11D-2340-08	316	0.0221518987341772	0.622106493085493
		STAD	TCGA-BR-8286-01A-12D-2340-08	136	0.0514705882352941	0.916788516125989
		STAD	TCGA-BR-8289-01A-11D-2340-08	197	0.065989847715736	1.79719653558031
		STAD	TCGA-BR-8297-01A-12D-2340-08	288	0.0555555555555556	1.28434888895069
		STAD	TCGA-BR-8360-01A-11D-2340-08	809	0.0160692212608158	0.399377007906736
		STAD	TCGA-BR-8361-01A-11D-2340-08	1392	0.0150862068965517	0.311053246542746
		STAD	TCGA-BR-8363-01A-11D-2340-08	1091	0.0155820348304308	0.346747881391914
		STAD	TCGA-BR-8366-01A-11D-2340-08	181	0.0386740331491713	1.08868636289961
		STAD	TCGA-BR-8368-01A-11D-2340-08	855	0.0105263157894737	0.287126073731766
		STAD	TCGA-BR-8369-01A-11D-2340-08	201	0.0298507462686567	1.06646827386084
		STAD	TCGA-BR-8370-01A-11D-2340-08	117	0.0512820512820513	1.35732325764107
		STAD	TCGA-BR-8372-01A-11D-2340-08	1217	0.00493015612161052	0.147827285485662
		STAD	TCGA-BR-8381-01A-11D-2394-08	131	0.0687022900763359	1.06646827386084
		STAD	TCGA-BR-8382-01A-11D-2394-08	878	0.00911161731207289	0.207368831028498
		STAD	TCGA-BR-8483-01A-31D-2394-08	117	0.00854700854700855	0.248842597234197
		STAD	TCGA-BR-8485-01A-11D-2394-08	313	0.0383386581469649	1.65895064822798
		STAD	TCGA-BR-8487-01A-11D-2394-08	2875	0.0125217391304348	0.252347422547355
		STAD	TCGA-BR-8588-01A-11D-2394-08	120	0.00833333333333333	0.226220542940179
		STAD	TCGA-BR-8589-01A-11D-2394-08	1228	0.0138436482084691	1.32197629780667
		STAD	TCGA-BR-8590-01A-11D-2394-08	130	0.0538461538461538	4.35474545159845
		STAD	TCGA-BR-8591-01A-11D-2394-08	1373	0.0123816460305899	0.262753052980208
		STAD	TCGA-BR-8678-01A-11D-2394-08	120	0.1	2.48842597234197
		STAD	TCGA-BR-8679-01A-11D-2394-08	166	0.0843373493975904	1.65895064822798
		STAD	TCGA-BR-8680-01A-11D-2394-08	5881	0.0399591906138412	1.70988334356831
		STAD	TCGA-BR-8683-01A-11D-2394-08	156	0.0512820512820513	1.17102398698446
		STAD	TCGA-BR-8686-01A-11D-2394-08	106	0.0943396226415094	2.26220542940179
		STAD	TCGA-BR-8687-01A-11D-2394-08	199	0.0452261306532663	1.24421298617099
		STAD	TCGA-BR-8690-01A-11D-2394-08	152	0.0460526315789474	1.16126545375959
		STAD	TCGA-BR-A452-01A-91D-A25D-08	104	0.144230769230769	2.87126073731766
		STAD	TCGA-BR-A4CQ-01A-12D-A25D-08	190	0.0473684210526316	0.799851205395634
		STAD	TCGA-BR-A4CS-01A-11D-A24D-08	150	0.0733333333333333	1.52070476087565
		STAD	TCGA-BR-A4IY-01A-11D-A25D-08	154	0.0844155844155844	1.61747688202228
		STAD	TCGA-BR-A4J8-01A-11D-A25D-08	105	0.0666666666666667	2.48842597234197
		STAD	TCGA-BR-A4PD-01A-11D-A25D-08	143	0.0979020979020979	3.87088484586529
		STAD	TCGA-BR-A4PE-01A-31D-A25D-08	206	0.0485436893203883	1.08192433580086
		STAD	TCGA-BR-A4QI-01A-12D-A25D-08	127	0.0866141732283465	1.82484571305078
		STAD	TCGA-BR-A4QL-01A-31D-A25D-08	1572	0.0127226463104326	0.345614718380829
		UCEC	TCGA-BS-A0TA-01A-11D-A10B-09	562	0.0160142348754448	0.257423376449169
		UCEC	TCGA-BS-A0TC-01A-11D-A10B-09	1179	0.0296861747243427	1.97942975072657
		UCEC	TCGA-BS-A0TE-01A-11D-A10B-09	391	0.0562659846547315	0.855396427992552
		UCEC	TCGA-BS-A0TI-01A-11D-A10B-09	105	0.0285714285714286	0.414737662056995
		UCEC	TCGA-BS-A0TJ-01A-11D-A10B-09	795	0.0226415094339623	0.311053246542746
		UCEC	TCGA-BS-A0U7-01A-21D-A10B-09	259	0.0347490347490347	0.605292804083182
		UCEC	TCGA-BS-A0U8-01A-11D-A10B-09	466	0.0214592274678112	0.345614718380829
		UCEC	TCGA-BS-A0UA-01A-11D-A122-09	291	0.0171821305841924	0.264726167270422
		UCEC	TCGA-BS-A0UF-01A-11D-A10B-09	7809	0.0348316045588424	2.31007462278845
		UCEC	TCGA-BS-A0UJ-01A-12D-A10B-09	1872	0.00801282051282051	0.540962167900428
		UCEC	TCGA-BS-A0UL-01A-11D-A10G-09	436	0.00458715596330275	0.0802718055594184
		UCEC	TCGA-BS-A0UM-01A-11W-A10C-09	570	0.0192982456140351	0.333813240192216
		UCEC	TCGA-BS-A0UV-01A-11D-A10B-09	8634	0.0480657864257586	2.69633623634966
		BLCA	TCGA-BT-A0YX-01A-11D-A10S-08	713	0.664796633941094	43.6857004033368
		BLCA	TCGA-BT-A20J-01A-11D-A14W-08	521	0.570057581573896	30.7942714077319
		BLCA	TCGA-BT-A20N-01A-11D-A14W-08	341	0.231671554252199	4.36857004033368
		BLCA	TCGA-BT-A20O-01A-21D-A14W-08	218	0.298165137614679	5.39158960674094
		BLCA	TCGA-BT-A20P-01A-11D-A14W-08	107	0.345794392523364	11.5089701220816
		BLCA	TCGA-BT-A20Q-01A-11D-A14W-08	101	0.445544554455446	22.3958337510777
		BLCA	TCGA-BT-A20R-01A-12D-A16O-08	302	0.513245033112583	25.7137350475337
		BLCA	TCGA-BT-A20T-01A-11D-A14W-08	284	0.514084507042254	18.1655095980964
		BLCA	TCGA-BT-A20V-01A-11D-A14W-08	102	0.186274509803922	3.37714953389267
		BLCA	TCGA-BT-A20W-01A-21D-A14W-08	118	0.186440677966102	3.42158571197021
		BLCA	TCGA-BT-A2LA-01A-11D-A18F-08	197	0.279187817258883	15.2070476087565
		BLCA	TCGA-BT-A2LB-01A-11D-A18F-08	659	0.327769347496206	7.16666680034488
		BLCA	TCGA-BT-A2LD-01A-12D-A20D-08	112	0.205357142857143	4.76948311365544
		BLCA	TCGA-BT-A3PH-01A-11D-A21Z-08	495	0.608080808080808	26.7505792026762
		BLCA	TCGA-BT-A3PJ-01A-21D-A21Z-08	565	0.408849557522124	9.74282033238975
		BLCA	TCGA-BT-A3PK-01A-21D-A21Z-08	449	0.242761692650334	4.3748134029883
		BLCA	TCGA-BT-A42C-01A-11D-A23M-08	389	0.282776349614396	5.0690158695855
		BLCA	TCGA-BT-A42E-01A-11D-A23U-08	189	0.497354497354497	12.3111600736919
		BLCA	TCGA-BT-A42F-01A-11D-A23U-08	193	0.549222797927461	23.979377551659
		LIHC	TCGA-BW-A5NO-01A-11D-A27I-10	183	0.0765027322404372	1.24421298617099
		LIHC	TCGA-BW-A5NP-01A-11D-A27I-10	104	0.0576923076923077	1.06646827386084
		LIHC	TCGA-BW-A5NQ-01A-11D-A27I-10	119	0.0504201680672269	0.597222233362073
		BLCA	TCGA-C4-A0EZ-01A-21D-A10S-08	204	0.284313725490196	4.51027207486982
		BLCA	TCGA-C4-A0F1-01A-11D-A10S-08	187	0.417112299465241	13.864087560191
		BLCA	TCGA-C4-A0F6-01A-11D-A10S-08	203	0.423645320197044	21.4004633621409
		CESC	TCGA-C5-A1BF-01B-11D-A13W-08	269	0.28996282527881	14.9305558340518
		CESC	TCGA-C5-A1BI-01B-11D-A13W-08	150	0.58	36.0821765989586
		CESC	TCGA-C5-A1BJ-01A-11D-A13W-08	330	0.557575757575758	22.8935189455461
		CESC	TCGA-C5-A1BK-01B-11D-A13W-08	220	0.486363636363636	15.6624458259171
		CESC	TCGA-C5-A1BL-01A-11D-A13W-08	286	0.506993006993007	15.6879028691124
		CESC	TCGA-C5-A1BM-01A-11D-A13W-08	155	0.503225806451613	38.8194451685347
		CESC	TCGA-C5-A1BN-01B-11D-A14W-08	157	0.356687898089172	12.66835040465
		CESC	TCGA-C5-A1BQ-01C-11D-A20U-09	1921	0.328474752732952	7.33736817078404
		CESC	TCGA-C5-A1M6-01A-11D-A13W-08	182	0.505494505494505	17.6103991888816
		CESC	TCGA-C5-A1M7-01A-11D-A13W-08	138	0.449275362318841	12.8568675237668
		CESC	TCGA-C5-A1M8-01A-21D-A13W-08	149	0.268456375838926	11.0596709881865
		CESC	TCGA-C5-A1M9-01A-11D-A13W-08	128	0.234375	4.6657986981412
		CESC	TCGA-C5-A1MF-01A-11D-A13W-08	123	0.382113821138211	8.99661697692866
		CESC	TCGA-C5-A1MH-01A-11D-A14W-08	684	0.597953216374269	21.2034629726639
		CESC	TCGA-C5-A1MI-01A-11D-A14W-08	191	0.193717277486911	5.75448506104081
		CESC	TCGA-C5-A1MJ-01A-11D-A14W-08	127	0.291338582677165	6.57655435547521
		CESC	TCGA-C5-A1MK-01A-11D-A14W-08	407	0.577395577395577	32.487783527798
		CESC	TCGA-C5-A1ML-01A-11D-A14W-08	235	0.195744680851064	5.72337973638653
		CESC	TCGA-C5-A1MN-01A-11D-A14W-08	173	0.439306358381503	18.912037389799
		CESC	TCGA-C5-A1MQ-01A-11D-A14W-08	149	0.154362416107383	4.08812838313324
		CESC	TCGA-C5-A2LV-01A-11D-A18J-09	110	0.172727272727273	4.72800934744974
		CESC	TCGA-C5-A2LX-01A-11D-A18J-09	311	0.276527331189711	11.2634017695479
		CESC	TCGA-C5-A2LY-01A-31D-A18J-09	144	0.270833333333333	8.82260117466699
		CESC	TCGA-C5-A2LZ-01A-11D-A20U-09	827	0.545344619105199	20.0407163129684
		CESC	TCGA-C5-A2M1-01A-11D-A18J-09	158	0.253164556962025	11.0596709881865
		CESC	TCGA-C5-A3HD-01B-11D-A20U-09	207	0.260869565217391	6.71875012532332
		CESC	TCGA-C5-A3HE-01A-21D-A22X-09	2960	0.102027027027027	1.81962383449703
		CESC	TCGA-C5-A3HL-01A-11D-A20U-09	1797	0.11463550361714	1.80498503627622
		CESC	TCGA-C5-A7CG-01A-11D-A32I-09	108	0.037037037037037	1.10596709881865
		CESC	TCGA-C5-A7CH-01A-11D-A33O-09	107	0.149532710280374	4.42386839527461
		CESC	TCGA-C5-A7CJ-01A-11D-A32I-09	209	0.110047846889952	2.86168986819327
		CESC	TCGA-C5-A7CK-01A-11D-A32I-09	290	0.179310344827586	4.4620051917856
		CESC	TCGA-C5-A7CL-01A-11D-A32I-09	243	0.251028806584362	12.6494986927384
		CESC	TCGA-C5-A7CO-01A-11D-A351-09	165	0.206060606060606	3.52527012748446
		CESC	TCGA-C5-A7UE-01A-11D-A33O-09	244	0.127049180327869	3.50641841557278
		CESC	TCGA-C5-A7UH-01A-11D-A351-09	315	0.479365079365079	25.0501547882425
		CESC	TCGA-C5-A7X3-01A-11D-A351-09	112	0.232142857142857	6.46990752808912
		BRCA	TCGA-C8-A12P-01A-11D-A10Y-09	139	0.410071942446043	14.1840280423492
		BRCA	TCGA-C8-A12Q-01A-11D-A10Y-09	105	0.419047619047619	27.3726856957617
		BRCA	TCGA-C8-A12T-01A-11D-A10Y-09	145	0.551724137931034	33.1790129645596
		BRCA	TCGA-C8-A1HJ-01A-11D-A13L-09	105	0.0761904761904762	0.947971798987417
		BRCA	TCGA-C8-A1HM-01A-12D-A135-09	285	0.557894736842105	16.4858220667656
		BRCA	TCGA-C8-A26Y-01A-11D-A16D-09	609	0.559934318555008	32.6366637141774
		BRCA	TCGA-C8-A274-01A-11D-A16D-09	167	0.491017964071856	20.4050929732042
		BRCA	TCGA-C8-A275-01A-21D-A16D-09	113	0.486725663716814	15.2070476087565
		BRCA	TCGA-C8-A27B-01A-11D-A167-09	134	0.305970149253731	4.43588977678351
		BRCA	TCGA-C8-A3M7-01A-12D-A21Q-09	156	0.455128205128205	14.7231870030233
		COAD	TCGA-CA-6716-01A-11D-1835-10	146	0.0547945205479452	1.80976434352143
		COAD	TCGA-CA-6717-01A-11D-1835-10	6022	0.0370308867485885	2.06289588041732
		COAD	TCGA-CA-6718-01A-11D-1835-10	2232	0.0327060931899642	2.29943159469575
		LIHC	TCGA-CC-5258-01A-01D-A12Z-10	598	0.020066889632107	0.694444457397759
		LIHC	TCGA-CC-5259-01A-31D-A20W-10	187	0.0106951871657754	0.311053246542746
		LIHC	TCGA-CC-5260-01A-01D-A12Z-10	467	0.012847965738758	0.403528536055455
		LIHC	TCGA-CC-5261-01A-01D-A12Z-10	1097	0.0255241567912489	0.548629348232875
		LIHC	TCGA-CC-5262-01A-01D-A12Z-10	368	0.0271739130434783	1.18496474873427
		LIHC	TCGA-CC-5263-01A-01D-A12Z-10	502	0.00796812749003984	0.331790129645596
		LIHC	TCGA-CC-5264-01A-01D-A12Z-10	725	0.0124137931034483	0.367144815591438
		LIHC	TCGA-CC-A123-01A-11D-A12Z-10	513	0.01364522417154	0.82947532411399
		LIHC	TCGA-CC-A1HT-01A-11D-A12Z-10	792	0.0151515151515152	0.414737662056995
		LIHC	TCGA-CC-A3M9-01A-11D-A20W-10	304	0.0394736842105263	1.49305558340518
		LIHC	TCGA-CC-A3MA-01A-11D-A20W-10	213	0.0140845070422535	0.533234136930422
		LIHC	TCGA-CC-A3MB-01A-11D-A20W-10	281	0.0213523131672598	0.82947532411399
		LIHC	TCGA-CC-A3MC-01A-11D-A22F-10	146	0.0479452054794521	1.0246459886114
		LIHC	TCGA-CC-A5UD-01A-11D-A28X-10	256	0.03515625	1.11979168755389
		LIHC	TCGA-CC-A5UE-01A-11D-A28X-10	149	0.0469798657718121	0.967721211466322
		LIHC	TCGA-CC-A7IF-01A-11D-A33K-10	141	0.0425531914893617	0.785818728107991
		LIHC	TCGA-CC-A7IG-01A-11D-A33K-10	171	0.0409356725146199	0.725790908599741
		LIHC	TCGA-CC-A7IH-01A-11D-A33K-10	957	0.0229885057471264	1.03293153568912
		LIHC	TCGA-CC-A7II-01A-11D-A33K-10	190	0.0368421052631579	1.08868636289961
		LIHC	TCGA-CC-A7IJ-01A-11D-A33Q-10	173	0.0635838150289017	0.855396427992552
		LIHC	TCGA-CC-A7IK-01A-12D-A33Q-10	361	0.0193905817174515	0.916788516125989
		LIHC	TCGA-CC-A7IL-01A-11D-A33Q-10	133	0.0526315789473684	0.87094909031969
		STAD	TCGA-CD-5800-01A-11D-1600-08	172	0.162790697674419	3.66715406450396
		STAD	TCGA-CD-5801-01A-11D-1600-08	573	0.0506108202443281	1.36159156977202
		STAD	TCGA-CD-5813-01A-11D-1600-08	190	0.0947368421052632	2.35745618432397
		STAD	TCGA-CD-8524-01A-11D-2340-08	149	0.0335570469798658	0.518422077571244
		STAD	TCGA-CD-8527-01A-11D-2340-08	255	0.0313725490196078	0.56878307939245
		STAD	TCGA-CD-8529-01A-11D-2340-08	436	0.130733944954128	1.86631947925648
		STAD	TCGA-CD-8531-01A-11D-2340-08	227	0.0308370044052863	0.414737662056995
		STAD	TCGA-CD-8535-01A-11D-2340-08	267	0.0786516853932584	1.63302954434942
		STAD	TCGA-CD-8536-01A-11D-2340-08	790	0.00632911392405063	0.141387839337612
		STAD	TCGA-CD-A487-01A-21D-A24D-08	172	0.0872093023255814	1.77744712310141
		STAD	TCGA-CD-A48A-01A-12D-A24D-08	241	0.0622406639004149	1.69665407205134
		STAD	TCGA-CD-A48C-01A-11D-A24D-08	218	0.0642201834862385	1.65895064822798
		STAD	TCGA-CD-A4MG-01A-11D-A25D-08	2467	0.00972841507904337	0.224519636602283
		STAD	TCGA-CD-A4MI-01A-21D-A25D-08	984	0.00914634146341463	0.162288650370129
		STAD	TCGA-CD-A4MJ-01A-11D-A25D-08	588	0.00850340136054422	0.230409812253886
		BLCA	TCGA-CF-A1HR-01A-11D-A13W-08	357	0.543417366946779	24.1377319317171
		BLCA	TCGA-CF-A1HS-01A-11D-A13W-08	335	0.408955223880597	10.3307381276015
		BLCA	TCGA-CF-A27C-01A-11D-A16O-08	174	0.568965517241379	16.423611417457
		BLCA	TCGA-CF-A3MG-01A-11D-A20D-08	157	0.484076433121019	23.6400467372487
		BLCA	TCGA-CF-A47X-01A-31D-A23U-08	345	0.492753623188406	22.2648639630597
		STAD	TCGA-CG-4300-01A-01D-1158-08	152	0.0526315789473684	1.42195769848113
		STAD	TCGA-CG-4305-01A-01D-1158-08	1134	0.0149911816578483	0.311053246542746
		STAD	TCGA-CG-4306-01A-01D-1158-08	1051	0.0142721217887726	0.333271335581514
		STAD	TCGA-CG-4436-01A-01D-1158-08	183	0.0655737704918033	2.13293654772169
		STAD	TCGA-CG-4437-01A-01D-1800-08	557	0.0825852782764812	1.05016141952046
		STAD	TCGA-CG-4438-01A-01D-1158-08	153	0.163398692810458	3.65944995932643
		STAD	TCGA-CG-4440-01A-01D-1158-08	132	0.121212121212121	2.84391539696225
		STAD	TCGA-CG-4441-01A-01D-1800-08	128	0.0390625	0.691229436761659
		STAD	TCGA-CG-4442-01A-01D-1158-08	1486	0.0121130551816958	0.322242212245723
		STAD	TCGA-CG-4443-01A-01D-1158-08	111	0.126126126126126	2.32253090751917
		STAD	TCGA-CG-4444-01A-01D-1158-08	188	0.0531914893617021	1.46377998373057
		STAD	TCGA-CG-4449-01A-01D-1158-08	108	0.148148148148148	3.0626781198055
		STAD	TCGA-CG-4460-01A-01D-1158-08	1935	0.00878552971576227	0.261131120554404
		STAD	TCGA-CG-4465-01A-01D-1158-08	570	0.012280701754386	0.223320279569151
		STAD	TCGA-CG-4466-01A-01D-1158-08	212	0.0613207547169811	1.54045417335455
		STAD	TCGA-CG-4469-01A-01D-1158-08	314	0.0414012738853503	1.34789740168523
		STAD	TCGA-CG-4476-01A-01D-1158-08	137	0.0948905109489051	2.31068126003183
		STAD	TCGA-CG-5717-01A-11D-1600-08	187	0.155080213903743	2.40547843993057
		STAD	TCGA-CG-5719-01A-11D-1600-08	104	0.125	2.94086705822233
		STAD	TCGA-CG-5720-01A-11D-1600-08	109	0.119266055045872	2.69579480337047
		STAD	TCGA-CG-5721-01A-11D-1600-08	4426	0.00948938093086308	0.362895454299871
		STAD	TCGA-CG-5723-01A-11D-1600-08	1571	0.0133672819859962	0.322573737155441
		STAD	TCGA-CG-5724-01A-11D-1600-08	124	0.0483870967741935	0.995370388936788
		STAD	TCGA-CG-5726-01A-11D-1600-08	1295	0.0154440154440154	0.411310078073053
		STAD	TCGA-CG-5727-01A-11D-1600-08	164	0.0548780487804878	1.11979168755389
		STAD	TCGA-CG-5728-01A-11D-1600-08	1297	0.0115651503469545	0.264726167270422
		STAD	TCGA-CG-5730-01A-11D-1600-08	154	0.142857142857143	2.88133533639597
		STAD	TCGA-CG-5733-01A-11D-1600-08	1098	0.0127504553734062	0.236992949746854
		STAD	TCGA-CG-5734-01A-11D-1600-08	111	0.027027027027027	0.933159739628239
		PRAD	TCGA-CH-5754-01A-11D-1576-08	102	0.0588235294117647	0.622106493085493
		PRAD	TCGA-CH-5762-01A-11D-1576-08	103	0.0970873786407767	2.07368831028498
		PRAD	TCGA-CH-5769-01A-11D-1576-08	104	0	0
		READ	TCGA-CI-6624-01C-11D-1826-10	221	0.0904977375565611	1.50813695293453
		KIRC	TCGA-CJ-4875-01A-01D-1373-10	102	0.0294117647058824	0.678661628820537
		KIRC	TCGA-CJ-4920-01A-01D-1429-08	143	0.0699300699300699	1.1311027147009
		KIRC	TCGA-CJ-6030-01A-11D-1669-08	108	0.111111111111111	1.57163745621598
		COAD	TCGA-CK-4950-01A-01D-1719-10	253	0.0355731225296443	0.678661628820537
		COAD	TCGA-CK-4952-01A-01D-1719-10	173	0.0520231213872832	1.31740198535751
		COAD	TCGA-CK-5913-01A-11D-1650-10	564	0.0106382978723404	0.248842597234197
		COAD	TCGA-CK-5914-01A-11D-1650-10	104	0.0480769230769231	0.95708691243922
		COAD	TCGA-CK-5916-01A-11D-1650-10	1120	0.0116071428571429	0.221572175619491
		COAD	TCGA-CM-4743-01A-01D-1719-10	773	0.0155239327296248	0.307846512042306
		COAD	TCGA-CM-4744-01A-01D-1408-10	125	0.016	0.552983549409327
		COAD	TCGA-CM-4746-01A-01D-1408-10	621	0.00966183574879227	0.34722222869888
		COAD	TCGA-CM-4752-01A-01D-1408-10	114	0.0087719298245614	0.191417382487844
		COAD	TCGA-CM-5341-01A-01D-1408-10	129	0.0775193798449612	2.07368831028498
		COAD	TCGA-CM-5348-01A-21D-1719-10	125	0.088	1.52070476087565
		COAD	TCGA-CM-5861-01A-01D-1650-10	1070	0.014018691588785	0.296241187183568
		COAD	TCGA-CM-5864-01A-01D-1650-10	161	0.0434782608695652	0.791771900290627
		COAD	TCGA-CM-5868-01A-01D-1650-10	101	0.0396039603960396	1.10596709881865
		COAD	TCGA-CM-6162-01A-11D-1650-10	901	0.00776914539400666	0.387088484586529
		COAD	TCGA-CM-6168-01A-11D-1650-10	153	0.0915032679738562	1.74189818063938
		COAD	TCGA-CM-6171-01A-11D-1650-10	834	0.0143884892086331	0.328144084264875
		COAD	TCGA-CM-6674-01A-11D-1835-10	651	0.010752688172043	0.220493440587263
		COAD	TCGA-CM-6677-01A-11D-1835-10	101	0.0297029702970297	0.82947532411399
		HNSC	TCGA-CN-4723-01A-01D-1434-08	933	0.57449088960343	24.2508422031872
		HNSC	TCGA-CN-4727-01A-01D-1434-08	454	0.0484581497797357	0.739802316101667
		HNSC	TCGA-CN-4728-01A-01D-1434-08	154	0.220779220779221	6.50819100458669
		HNSC	TCGA-CN-4729-01A-01D-1434-08	145	0.227586206896552	3.57035030814283
		HNSC	TCGA-CN-4730-01A-01D-1434-08	187	0.299465240641711	9.29012363007669
		HNSC	TCGA-CN-4731-01A-01D-1434-08	116	0.181034482758621	5.80632726879793
		HNSC	TCGA-CN-4734-01A-01D-1434-08	166	0.283132530120482	5.08504437826403
		HNSC	TCGA-CN-4735-01A-01D-1434-08	162	0.302469135802469	7.62080454029729
		HNSC	TCGA-CN-4738-01A-02D-1512-08	122	0.163934426229508	3.11053246542746
		HNSC	TCGA-CN-4739-01A-02D-1512-08	225	0.0844444444444444	2.05565623802163
		HNSC	TCGA-CN-4740-01A-01D-1434-08	160	0.3125	5.65551357350448
		HNSC	TCGA-CN-4741-01A-01D-1434-08	179	0.335195530726257	9.33159739628239
		HNSC	TCGA-CN-5355-01A-01D-1434-08	123	0.024390243902439	0.46657986981412
		HNSC	TCGA-CN-5356-01A-01D-1434-08	378	0.0687830687830688	1.13507149615599
		HNSC	TCGA-CN-5359-01A-01D-1434-08	179	0.106145251396648	2.25143302259512
		HNSC	TCGA-CN-5360-01A-01D-1434-08	529	0.0472589792060491	0.864036795952073
		HNSC	TCGA-CN-5361-01A-01D-1434-08	125	0.216	3.95220595607254
		HNSC	TCGA-CN-5363-01A-01D-1434-08	200	0.1	1.65895064822798
		HNSC	TCGA-CN-5364-01A-01D-1434-08	136	0.191176470588235	3.40521448846796
		HNSC	TCGA-CN-5366-01A-01D-1434-08	103	0.174757281553398	6.39880964316507
		HNSC	TCGA-CN-5367-01A-01D-1434-08	111	0.0990990990990991	1.61015798210363
		HNSC	TCGA-CN-5369-01A-01D-1434-08	558	0.288530465949821	11.4467594727731
		HNSC	TCGA-CN-5370-01A-01D-2012-08	102	0.264705882352941	6.71875012532332
		HNSC	TCGA-CN-5373-01A-01D-1434-08	153	0.130718954248366	2.07368831028498
		HNSC	TCGA-CN-5374-01A-01D-1434-08	185	0.356756756756757	9.66094789262177
		HNSC	TCGA-CN-6010-01A-11D-1683-08	178	0.0393258426966292	0.7573470350606
		HNSC	TCGA-CN-6011-01A-11D-1683-08	366	0.5	15.7028259633993
		HNSC	TCGA-CN-6012-01A-11D-1683-08	119	0.252100840336134	7.46527791702591
		HNSC	TCGA-CN-6013-01A-11D-1683-08	204	0.416666666666667	17.6263506374223
		HNSC	TCGA-CN-6016-01A-11D-1683-08	122	0.270491803278689	5.47453713915234
		HNSC	TCGA-CN-6018-01A-11D-1683-08	109	0.201834862385321	4.97685194468394
		HNSC	TCGA-CN-6019-01A-11D-1683-08	137	0.0802919708029197	1.61015798210363
		HNSC	TCGA-CN-6020-01A-11D-1683-08	162	0.203703703703704	5.13237856795531
		HNSC	TCGA-CN-6021-01A-11D-1683-08	262	0.106870229007634	1.62037040059477
		HNSC	TCGA-CN-6023-01A-11D-1683-08	114	0.254385964912281	3.79812385252196
		HNSC	TCGA-CN-6024-01A-11D-1683-08	186	0.0591397849462366	1.19011676938094
		HNSC	TCGA-CN-6988-01A-11D-1912-08	161	0.0745341614906832	1.35732325764107
		HNSC	TCGA-CN-6989-01A-11D-1912-08	110	0.209090909090909	4.08812838313324
		HNSC	TCGA-CN-6992-01A-11D-1912-08	355	0.0816901408450704	1.6400989363163
		HNSC	TCGA-CN-6994-01A-11D-1912-08	132	0.257575757575758	5.64043220397513
		HNSC	TCGA-CN-6995-01A-31D-2012-08	229	0.0829694323144105	1.75111457312954
		HNSC	TCGA-CN-6997-01A-11D-2012-08	139	0.172661870503597	4.97685194468394
		HNSC	TCGA-CN-A497-01A-11D-A24D-08	364	0.0467032967032967	0.863331459792112
		HNSC	TCGA-CN-A498-01A-11D-A24D-08	114	0.210526315789474	3.51307196095337
		HNSC	TCGA-CN-A49A-01A-11D-A24D-08	127	0.291338582677165	11.5089701220816
		HNSC	TCGA-CN-A49B-01A-31D-A24D-08	113	0.274336283185841	5.14274700950674
		HNSC	TCGA-CN-A63T-01A-11D-A28R-08	276	0.0942028985507246	1.61747688202228
		HNSC	TCGA-CN-A63U-01A-11D-A30E-08	563	0.0319715808170515	0.539658644604283
		HNSC	TCGA-CN-A63W-01A-11D-A30E-08	422	0.0995260663507109	1.93544242293264
		HNSC	TCGA-CN-A63Y-01A-11D-A30E-08	182	0.527472527472527	29.8611116681036
		HNSC	TCGA-CN-A641-01A-11D-A30E-08	231	0.0692640692640693	1.10596709881865
		HNSC	TCGA-CN-A6V1-01A-12D-A34J-08	439	0.660592255125285	32.801978726326
		HNSC	TCGA-CN-A6V3-01A-12D-A34J-08	250	0.076	1.4327301052878
		HNSC	TCGA-CQ-5326-01A-01D-1870-08	232	0.413793103448276	13.2716051858238
		HNSC	TCGA-CQ-5327-01A-01D-1683-08	236	0.495762711864407	24.2621532303342
		HNSC	TCGA-CQ-5331-01A-02D-1870-08	144	0.541666666666667	19.4097225842674
		HNSC	TCGA-CQ-5332-01A-01D-1683-08	151	0.112582781456954	2.82021610198757
		HNSC	TCGA-CQ-5333-01A-01D-2394-08	220	0.318181818181818	10.246459886114
		HNSC	TCGA-CQ-5334-01A-01D-1683-08	183	0.349726775956284	7.58377439189934
		HNSC	TCGA-CQ-6218-01A-11D-1912-08	138	0.289855072463768	9.95370388936788
		HNSC	TCGA-CQ-6220-01A-11D-1912-08	123	0.235772357723577	5.15459665699408
		HNSC	TCGA-CQ-6221-01A-11D-2078-08	109	0.330275229357798	5.97222233362073
		HNSC	TCGA-CQ-6225-01A-11D-1912-08	156	0.115384615384615	1.7227564423906
		HNSC	TCGA-CQ-6228-01A-11D-1912-08	112	0.0714285714285714	1.10596709881865
		HNSC	TCGA-CQ-7063-01A-11D-2394-08	142	0.366197183098592	9.95370388936788
		HNSC	TCGA-CQ-7064-01A-11D-2394-08	110	0.354545454545455	16.1747688202228
		HNSC	TCGA-CQ-7068-01A-11D-2078-08	108	0.259259259259259	6.96759272255752
		HNSC	TCGA-CQ-7071-01A-12D-A30E-08	452	0.544247787610619	29.1501328188631
		HNSC	TCGA-CQ-7072-01A-21D-A30E-08	136	0.0294117647058824	0.414737662056995
		HNSC	TCGA-CQ-A4C6-01A-11D-A25D-08	107	0.392523364485981	20.9027781676726
		HNSC	TCGA-CQ-A4C9-01A-11D-A25D-08	101	0.257425742574257	4.0436922050557
		HNSC	TCGA-CQ-A4CD-01A-21D-A25D-08	146	0.417808219178082	18.9742480391075
		HNSC	TCGA-CQ-A4CI-01A-11D-A25Y-08	102	0.107843137254902	1.82484571305078
		HNSC	TCGA-CR-5248-01A-01D-2012-08	349	0.458452722063037	18.0976434352143
		HNSC	TCGA-CR-6471-01A-11D-1870-08	137	0.0802919708029197	1.3034612236077
		HNSC	TCGA-CR-6472-01A-11D-1870-08	487	0.550308008213552	20.2090351693227
		HNSC	TCGA-CR-6474-01A-11D-1870-08	121	0.214876033057851	6.46990752808912
		HNSC	TCGA-CR-6478-01A-11D-1870-08	138	0.268115942028986	3.83632337402721
		HNSC	TCGA-CR-6480-01A-11D-1870-08	122	0.442622950819672	13.4375002506466
		HNSC	TCGA-CR-6481-01A-11D-1870-08	518	0.594594594594595	30.6574079792531
		HNSC	TCGA-CR-6484-01A-11D-1870-08	302	0.5	14.4520123778322
		HNSC	TCGA-CR-6487-01A-11D-1870-08	139	0.251798561151079	9.67721211466322
		HNSC	TCGA-CR-6491-01A-11D-1870-08	160	0.1125	1.7227564423906
		HNSC	TCGA-CR-7364-01A-11D-2012-08	468	0.0683760683760684	1.18850195693945
		HNSC	TCGA-CR-7365-01A-11D-2012-08	158	0.443037974683544	29.0316363439897
		HNSC	TCGA-CR-7367-01A-11D-2012-08	184	0.0815217391304348	1.55526623271373
		HNSC	TCGA-CR-7368-01A-11D-2129-08	200	0.43	10.1906968391147
		HNSC	TCGA-CR-7370-01A-11D-2129-08	545	0.122935779816514	2.16525376814171
		HNSC	TCGA-CR-7371-01A-11D-2012-08	298	0.25503355704698	8.22262495208651
		HNSC	TCGA-CR-7373-01A-11D-2012-08	116	0.370689655172414	10.7002316810705
		HNSC	TCGA-CR-7374-01A-11D-2012-08	381	0.246719160104987	4.58651061568912
		HNSC	TCGA-CR-7377-01A-11D-2012-08	135	0.111111111111111	2.3328993490706
		HNSC	TCGA-CR-7379-01A-11D-2012-08	142	0.0845070422535211	1.24421298617099
		HNSC	TCGA-CR-7383-01A-11D-2129-08	123	0.0894308943089431	1.44066766819798
		HNSC	TCGA-CR-7386-01A-11D-2012-08	189	0.523809523809524	20.5295142718213
		HNSC	TCGA-CR-7388-01A-11D-2012-08	707	0.28995756718529	7.8481126820016
		HNSC	TCGA-CR-7389-01A-11D-2012-08	125	0.056	1.93544242293264
		HNSC	TCGA-CR-7390-01A-11D-2012-08	145	0.227586206896552	3.9103836708231
		HNSC	TCGA-CR-7394-01A-11D-2012-08	190	0.368421052631579	5.44343181449806
		HNSC	TCGA-CR-7395-01A-11D-2012-08	168	0.345238095238095	8.01826146643524
		HNSC	TCGA-CR-7398-01A-11D-2012-08	320	0.065625	1.41234987619409
		HNSC	TCGA-CR-7399-01A-11D-2012-08	280	0.114285714285714	2.41301912469524
		HNSC	TCGA-CR-7402-01A-11D-2012-08	985	0.050761421319797	1.01984670997622
		HNSC	TCGA-CR-7404-01A-11D-2129-08	130	0.407692307692308	16.4858220667656
		BLCA	TCGA-CU-A0YN-01A-21D-A10S-08	176	0.0909090909090909	1.37292467439557
		BLCA	TCGA-CU-A0YO-01A-11D-A10S-08	120	0.325	10.7831792134819
		BLCA	TCGA-CU-A0YR-01A-12D-A10S-08	161	0.0807453416149068	1.40650163654111
		BLCA	TCGA-CU-A3KJ-01A-11D-A21A-08	259	0.478764478764479	16.2402537142318
		BLCA	TCGA-CU-A3QU-01A-11D-A22Z-08	110	0.318181818181818	8.7094909031969
		BLCA	TCGA-CU-A3YL-01A-11D-A22Z-08	239	0.564853556485356	41.9921882832708
		BLCA	TCGA-CU-A5W6-01A-11D-A289-08	227	0.488986784140969	14.5376464699978
		BLCA	TCGA-CU-A72E-01A-12D-A339-08	105	0.361904761904762	6.30401246326633
		HNSC	TCGA-CV-5430-01A-02D-1683-08	158	0.291139240506329	7.63117298184871
		HNSC	TCGA-CV-5432-01A-02D-1683-08	285	0.0771929824561404	1.61015798210363
		HNSC	TCGA-CV-5434-01A-01D-1683-08	143	0.111888111888112	2.34204797396891
		HNSC	TCGA-CV-5435-01A-01D-1683-08	122	0.0737704918032787	1.01799244323081
		HNSC	TCGA-CV-5436-01A-01D-1512-08	102	0.176470588235294	3.19940482158253
		HNSC	TCGA-CV-5439-01A-01D-1683-08	113	0.0530973451327434	1.24421298617099
		HNSC	TCGA-CV-5440-01A-01D-1512-08	113	0.292035398230089	8.2118057087285
		HNSC	TCGA-CV-5441-01A-01D-1512-08	399	0.0576441102756892	1.1006499493051
		HNSC	TCGA-CV-5442-01A-01D-1512-08	263	0.44106463878327	19.2438275194446
		HNSC	TCGA-CV-5444-01A-02D-1512-08	156	0.346153846153846	7.90441191214508
		HNSC	TCGA-CV-5966-01A-11D-1683-08	114	0.219298245614035	5.65551357350448
		HNSC	TCGA-CV-5970-01A-11D-1683-08	200	0.33	11.7311510124693
		HNSC	TCGA-CV-5977-01A-11D-1683-08	101	0.247524752475248	5.65551357350448
		HNSC	TCGA-CV-5978-01A-11D-1683-08	172	0.0755813953488372	1.24421298617099
		HNSC	TCGA-CV-6441-01A-11D-1683-08	237	0.367088607594937	8.65972238375006
		HNSC	TCGA-CV-6933-01A-11D-1912-08	122	0.180327868852459	3.22031596420726
		HNSC	TCGA-CV-6935-01A-11D-1912-08	220	0.181818181818182	4.73985899493709
		HNSC	TCGA-CV-6936-01A-11D-1912-08	268	0.391791044776119	15.369689829171
		HNSC	TCGA-CV-6937-01A-11D-2012-08	134	0.171641791044776	4.08812838313324
		HNSC	TCGA-CV-6938-01A-11D-1912-08	147	0.108843537414966	1.99074077787358
		HNSC	TCGA-CV-6940-01A-11D-1912-08	146	0.335616438356164	11.0848066040688
		HNSC	TCGA-CV-6941-01A-11D-1912-08	154	0.0779220779220779	1.02969350579668
		HNSC	TCGA-CV-6942-01A-21D-2012-08	222	0.405405405405405	15.9970241079127
		HNSC	TCGA-CV-6945-01A-11D-1912-08	132	0.0833333333333333	1.7107928559851
		HNSC	TCGA-CV-6948-01A-11D-1912-08	209	0.196172248803828	3.00074896664767
		HNSC	TCGA-CV-6951-01A-11D-1912-08	132	0.234848484848485	5.14274700950674
		HNSC	TCGA-CV-6952-01A-11D-1912-08	156	0.217948717948718	5.28790519122669
		HNSC	TCGA-CV-6953-01A-11D-1912-08	109	0.18348623853211	3.11053246542746
		HNSC	TCGA-CV-6954-01A-11D-1912-08	171	0.0935672514619883	2.48842597234197
		HNSC	TCGA-CV-6955-01A-11D-2012-08	121	0.289256198347107	7.91771900290627
		HNSC	TCGA-CV-6956-01A-21D-2012-08	197	0.101522842639594	1.38245887352332
		HNSC	TCGA-CV-6960-01A-41D-2012-08	175	0.0628571428571429	1.14052857065674
		HNSC	TCGA-CV-6961-01A-21D-1912-08	631	0.576862123613312	24.4807311873643
		HNSC	TCGA-CV-6962-01A-11D-1912-08	142	0.0563380281690141	0.904882171760717
		HNSC	TCGA-CV-7089-01A-11D-2012-08	170	0.458823529411765	12.9398150561782
		HNSC	TCGA-CV-7091-01A-11D-2012-08	133	0.142857142857143	1.63034805084474
		HNSC	TCGA-CV-7095-01A-21D-2012-08	240	0.320833333333333	7.98369999459716
		HNSC	TCGA-CV-7099-01A-41D-2012-08	288	0.489583333333333	15.2551331347921
		HNSC	TCGA-CV-7101-01A-11D-2012-08	207	0.164251207729469	3.13357344665285
		HNSC	TCGA-CV-7102-01A-11D-2012-08	141	0.333333333333333	7.79706804667151
		HNSC	TCGA-CV-7177-01A-11D-2012-08	109	0.146788990825688	3.0626781198055
		HNSC	TCGA-CV-7178-01A-21D-2012-08	130	0.153846153846154	3.31790129645596
		HNSC	TCGA-CV-7235-01A-11D-2012-08	143	0.174825174825175	4.44361780775352
		HNSC	TCGA-CV-7242-01A-11D-2012-08	307	0.0553745928338762	0.769149845996609
		HNSC	TCGA-CV-7245-01A-11D-2012-08	538	0.0576208178438662	0.952360557316063
		HNSC	TCGA-CV-7248-01A-11D-2012-08	253	0.106719367588933	2.68750005012933
		HNSC	TCGA-CV-7250-01A-11D-2012-08	207	0.0821256038647343	0.983796314646826
		HNSC	TCGA-CV-7252-01A-11D-2012-08	227	0.237885462555066	4.19921882832708
		HNSC	TCGA-CV-7253-01A-11D-2012-08	199	0.0552763819095477	0.882989861153603
		HNSC	TCGA-CV-7254-01A-11D-2012-08	261	0.0881226053639847	1.6352513532533
		HNSC	TCGA-CV-7261-01A-11D-2012-08	124	0.17741935483871	3.42158571197021
		HNSC	TCGA-CV-7263-01A-11D-2012-08	108	0.0648148148148148	1.16126545375959
		HNSC	TCGA-CV-7406-01A-11D-2078-08	179	0.402234636871508	10.5392158828601
		HNSC	TCGA-CV-7407-01A-11D-2078-08	131	0.083969465648855	1.19011676938094
		HNSC	TCGA-CV-7409-01A-31D-2229-08	304	0.0493421052631579	0.933159739628239
		HNSC	TCGA-CV-7411-01A-11D-2078-08	125	0.16	2.48842597234197
		HNSC	TCGA-CV-7414-01A-11D-2078-08	284	0.408450704225352	13.7455910853176
		HNSC	TCGA-CV-7418-01A-11D-2078-08	174	0.149425287356322	2.58796301123565
		HNSC	TCGA-CV-7422-01A-21D-2078-08	127	0.141732283464567	2.63480397071503
		HNSC	TCGA-CV-7424-01A-11D-2078-08	201	0.199004975124378	3.68655699606218
		HNSC	TCGA-CV-7425-01A-11D-2078-08	113	0.168141592920354	3.15200623163316
		HNSC	TCGA-CV-7427-01A-11D-2078-08	457	0.641137855579869	38.3741478892736
		HNSC	TCGA-CV-7430-01A-11D-2129-08	116	0.0948275862068965	2.48842597234197
		HNSC	TCGA-CV-7432-01A-11D-2129-08	147	0.0952380952380952	1.58354380058125
		HNSC	TCGA-CV-7433-01A-11D-2129-08	139	0.287769784172662	6.63580259291192
		HNSC	TCGA-CV-7437-01A-21D-2129-08	139	0.151079136690647	3.0739379658342
		HNSC	TCGA-CV-7438-01A-21D-2129-08	111	0.225225225225225	4.7854345621961
		HNSC	TCGA-CV-7440-01A-11D-2129-08	207	0.111111111111111	2.11977027273575
		HNSC	TCGA-CV-7446-01A-11D-2229-08	146	0.191780821917808	3.0293881402424
		HNSC	TCGA-CV-7568-01A-11D-2229-08	2494	0.124699278267843	1.46572060113324
		HNSC	TCGA-CV-A45O-01A-21D-A24D-08	155	0.483870967741935	23.328993490706
		HNSC	TCGA-CV-A45P-01A-11D-A24D-08	169	0.455621301775148	17.4189818063938
		HNSC	TCGA-CV-A45Q-01A-11D-A24D-08	299	0.391304347826087	11.6458335505604
		HNSC	TCGA-CV-A45U-01A-12D-A24D-08	219	0.356164383561644	7.76388903370695
		HNSC	TCGA-CV-A45V-01A-21D-A25D-08	105	0.228571428571429	4.97685194468394
		HNSC	TCGA-CV-A45W-01A-11D-A25D-08	642	0.0825545171339564	1.62822933992746
		HNSC	TCGA-CV-A45X-01A-21D-A25D-08	119	0.126050420168067	3.73263895851296
		HNSC	TCGA-CV-A45Z-01A-21D-A25D-08	757	0.0739762219286658	1.43661705619743
		HNSC	TCGA-CV-A461-01A-41D-A25Y-08	612	0.0637254901960784	1.12847224327136
		HNSC	TCGA-CV-A463-01A-11D-A25Y-08	215	0.334883720930233	9.95370388936788
		HNSC	TCGA-CV-A468-01A-11D-A25Y-08	559	0.12701252236136	1.41342595229024
		HNSC	TCGA-CV-A6JE-01A-11D-A31L-08	142	0.274647887323944	6.46990752808912
		HNSC	TCGA-CV-A6JM-01A-11D-A31L-08	312	0.41025641025641	10.6172841486591
		HNSC	TCGA-CV-A6JU-01A-11D-A31L-08	129	0.0852713178294574	1.7107928559851
		HNSC	TCGA-CV-A6JY-01A-11D-A31L-08	103	0.0679611650485437	2.90316363439897
		HNSC	TCGA-CV-A6JZ-01A-11D-A31L-08	116	0.0862068965517241	1.55526623271373
		HNSC	TCGA-CV-A6K1-01A-11D-A31L-08	477	0.134171907756813	3.31790129645596
		HNSC	TCGA-CV-A6K2-01A-11D-A31L-08	764	0.598167539267016	26.4467597525647
		KIRC	TCGA-CW-5580-01A-01D-1669-08	107	0.0934579439252336	1.38245887352332
		KIRC	TCGA-CW-6090-01A-11D-1669-08	108	0.111111111111111	1.65895064822798
		KIRC	TCGA-CW-6093-01A-11D-1669-08	116	0.0862068965517241	1.18496474873427
		HNSC	TCGA-CX-7085-01A-21D-2012-08	156	0.551282051282051	30.5720905173442
		HNSC	TCGA-CX-7086-01A-11D-2078-08	254	0.259842519685039	5.13237856795531
		HNSC	TCGA-CX-7219-01A-11D-2012-08	125	0.216	3.19940482158253
		KIRC	TCGA-CZ-4859-01A-02D-1429-08	109	0.055045871559633	1.06646827386084
		KIRC	TCGA-CZ-5468-01A-01D-1501-10	135	0.0666666666666667	1.11979168755389
		UCEC	TCGA-D1-A0ZO-01A-11D-A122-09	630	0.019047619047619	0.255223176650459
		UCEC	TCGA-D1-A0ZS-01A-11D-A122-09	387	0.0180878552971576	0.25616149715285
		UCEC	TCGA-D1-A101-01A-12D-A10M-09	739	0.0189445196211096	0.241930302866581
		UCEC	TCGA-D1-A103-01A-11D-A10M-09	7236	0.0294361525704809	0.660068159537783
		UCEC	TCGA-D1-A15W-01A-11D-A122-09	108	0.00925925925925926	0.276491774704663
		UCEC	TCGA-D1-A15X-01A-11D-A122-09	1751	0.0165619645916619	0.360821765989586
		UCEC	TCGA-D1-A160-01A-11D-A122-09	432	0.0138888888888889	0.150813695293453
		UCEC	TCGA-D1-A163-01A-11D-A12J-09	629	0.0158982511923688	0.232563174985231
		UCEC	TCGA-D1-A167-01A-11D-A12J-09	1739	0.0103507763082231	0.220648608385002
		UCEC	TCGA-D1-A16F-01A-11D-A12J-09	348	0.00574712643678161	0.0904882171760717
		UCEC	TCGA-D1-A16J-01A-11D-A12J-09	305	0.409836065573771	17.2807359190415
		UCEC	TCGA-D1-A16N-01A-11D-A12J-09	242	0.0330578512396694	1.42195769848113
		UCEC	TCGA-D1-A16X-01A-11D-A12J-09	1841	0.0347637153720804	2.48842597234197
		UCEC	TCGA-D1-A16Y-01A-31D-A12J-09	977	0.0388945752302968	2.78118196908809
		UCEC	TCGA-D1-A174-01A-11D-A12J-09	972	0.0133744855967078	0.189178582692664
		UCEC	TCGA-D1-A176-01A-11D-A12J-09	661	0.0151285930408472	0.230409812253886
		UCEC	TCGA-D1-A177-01A-21D-A12J-09	812	0.0184729064039409	0.327424470044996
		UCEC	TCGA-D1-A17A-01A-11D-A12J-09	299	0.0334448160535117	0.638057941626146
		UCEC	TCGA-D1-A17B-01A-22D-A12J-09	353	0.0169971671388102	0.452441085880358
		UCEC	TCGA-D1-A17D-01A-12D-A12J-09	569	0.0228471001757469	0.2788753244866
		UCEC	TCGA-D1-A17F-01A-11D-A12J-09	342	0.0701754385964912	0.796296311149431
		UCEC	TCGA-D1-A17H-01A-11D-A12J-09	774	0.0167958656330749	0.217110990875474
		UCEC	TCGA-D1-A17K-01A-11D-A12J-09	104	0.0480769230769231	0.95708691243922
		UCEC	TCGA-D1-A17M-01A-21D-A12J-09	533	0.0187617260787993	0.345614718380829
		UCEC	TCGA-D1-A17Q-01A-11D-A12J-09	5616	0.0332977207977208	2.09610656228806
		UCEC	TCGA-D1-A17R-01A-11D-A12J-09	321	0.0218068535825545	0.435474545159845
		UCEC	TCGA-D1-A17T-01A-11D-A12J-09	103	0.058252427184466	2.98611116681036
		UCEC	TCGA-D1-A17U-01A-21D-A12J-09	584	0.0154109589041096	0.228528915827324
		SKCM	TCGA-D3-A1Q4-06A-11D-A196-08	305	0.144262295081967	1.99074077787358
		SKCM	TCGA-D3-A1Q5-06A-11D-A196-08	405	0.116049382716049	1.49943616282144
		SKCM	TCGA-D3-A1Q6-06A-11D-A196-08	949	0.169652265542677	1.90779324546218
		SKCM	TCGA-D3-A1Q7-06A-11D-A19A-08	102	0.156862745098039	1.80976434352143
		SKCM	TCGA-D3-A1Q8-06A-11D-A19A-08	266	0.199248120300752	2.3979377551659
		SKCM	TCGA-D3-A1QA-06A-11D-A196-08	505	0.184158415841584	2.54311665305278
		SKCM	TCGA-D3-A1QB-06A-11D-A19A-08	423	0.163120567375887	2.48842597234197
		SKCM	TCGA-D3-A2J7-06A-11D-A196-08	400	0.175	2.07368831028498
		SKCM	TCGA-D3-A2J8-06A-11D-A196-08	711	0.191279887482419	2.86801637490261
		SKCM	TCGA-D3-A2JA-06A-11D-A196-08	415	0.120481927710843	1.36726701777031
		SKCM	TCGA-D3-A2JC-06A-11D-A19A-08	228	0.118421052631579	1.97610297803627
		SKCM	TCGA-D3-A2JD-06A-11D-A19A-08	456	0.144736842105263	2.00287944115329
		SKCM	TCGA-D3-A2JF-06A-11D-A196-08	1546	0.159767141009056	1.93283400996373
		SKCM	TCGA-D3-A2JG-06A-11D-A196-08	136	0.139705882352941	1.81846513363452
		SKCM	TCGA-D3-A2JH-06A-11D-A196-08	731	0.161422708618331	2.387270445011
		SKCM	TCGA-D3-A2JK-06A-11D-A196-08	333	0.159159159159159	1.80666543197431
		SKCM	TCGA-D3-A2JL-06A-11D-A196-08	376	0.156914893617021	2.40683823554387
		SKCM	TCGA-D3-A2JN-06A-11D-A196-08	368	0.154891304347826	1.97000389477073
		SKCM	TCGA-D3-A2JO-06A-11D-A196-08	676	0.14792899408284	2.20214687817874
		SKCM	TCGA-D3-A2JP-06A-11D-A19A-08	312	0.163461538461538	2.30744953798983
		SKCM	TCGA-D3-A3C1-06A-12D-A196-08	175	0.148571428571429	1.65895064822798
		SKCM	TCGA-D3-A3C3-06A-12D-A19A-08	274	0.156934306569343	2.14004633621409
		SKCM	TCGA-D3-A3C6-06A-12D-A196-08	122	0.0983606557377049	1.99074077787358
		SKCM	TCGA-D3-A3C7-06A-11D-A196-08	987	0.154002026342452	2.29236816846048
		SKCM	TCGA-D3-A3C8-06A-12D-A19A-08	762	0.162729658792651	2.09908041204357
		SKCM	TCGA-D3-A3CB-06A-11D-A196-08	310	0.183870967741935	2.78118196908809
		SKCM	TCGA-D3-A3ML-06A-11D-A21A-08	1030	0.184466019417476	2.5978073337636
		SKCM	TCGA-D3-A3MR-06A-11D-A21A-08	1004	0.159362549800797	2.14058148158449
		SKCM	TCGA-D3-A3MU-06A-11D-A21A-08	542	0.166051660516605	2.26220542940179
		SKCM	TCGA-D3-A3MV-06A-11D-A21A-08	577	0.180242634315425	2.58796301123565
		SKCM	TCGA-D3-A51E-06A-11D-A25O-08	308	0.126623376623377	1.61747688202228
		SKCM	TCGA-D3-A51F-06A-11D-A25O-08	155	0.135483870967742	1.41234987619409
		SKCM	TCGA-D3-A51G-06A-11D-A25O-08	1400	0.150714285714286	1.9446588154228
		SKCM	TCGA-D3-A51J-06A-11D-A25O-08	475	0.157894736842105	1.86631947925648
		SKCM	TCGA-D3-A51N-06A-11D-A25O-08	102	0.147058823529412	2.07368831028498
		SKCM	TCGA-D3-A51R-06A-11D-A25O-08	782	0.168797953964194	2.1468773094715
		SKCM	TCGA-D3-A51T-06A-11D-A25O-08	1245	0.160642570281124	2.10883556978133
		SKCM	TCGA-D3-A5GL-06A-11D-A27K-08	479	0.125260960334029	2.3328993490706
		SKCM	TCGA-D3-A5GN-06A-11D-A27K-08	526	0.150190114068441	2.13680056320669
		SKCM	TCGA-D3-A5GO-06A-12D-A27K-08	1714	0.182030338389732	2.31757881603192
		SKCM	TCGA-D3-A5GR-06A-11D-A27K-08	265	0.147169811320755	1.7645202349334
		SKCM	TCGA-D3-A5GS-06A-11D-A27K-08	432	0.1875	2.09960941416354
		SKCM	TCGA-D3-A5GU-06A-11D-A27K-08	814	0.171990171990172	1.97942975072657
		COAD	TCGA-D5-5540-01A-01D-1650-10	101	0.0495049504950495	2.07368831028498
		COAD	TCGA-D5-6531-01A-11D-1719-10	154	0.0714285714285714	2.48842597234197
		COAD	TCGA-D5-6533-01A-11D-1719-10	129	0.0775193798449612	1.91417382487844
		COAD	TCGA-D5-6534-01A-21D-1924-10	120	0.0416666666666667	0.691229436761659
		COAD	TCGA-D5-6535-01A-11D-1719-10	129	0.108527131782946	2.32253090751917
		COAD	TCGA-D5-6537-01A-11D-1719-10	181	0.0165745856353591	0.533234136930422
		COAD	TCGA-D5-6538-01A-11D-1719-10	106	0.0660377358490566	1.74189818063938
		COAD	TCGA-D5-6540-01A-11D-1719-10	948	0.00949367088607595	0.207368831028498
		COAD	TCGA-D5-6924-01A-11D-1924-10	133	0.0451127819548872	1.06646827386084
		COAD	TCGA-D5-6927-01A-21D-1924-10	536	0.0130597014925373	0.305596172041996
		COAD	TCGA-D5-6928-01A-11D-1924-10	1326	0.0173453996983409	0.357711233524158
		COAD	TCGA-D5-6929-01A-31D-1924-10	102	0.0784313725490196	2.48842597234197
		COAD	TCGA-D5-6930-01A-11D-1924-10	969	0.0196078431372549	0.369375730269511
		COAD	TCGA-D5-6931-01A-11D-1924-10	245	0.0448979591836735	1.05279560368314
		HNSC	TCGA-D6-6516-01A-11D-1870-08	2117	0.108171941426547	1.33454226619745
		HNSC	TCGA-D6-6823-01A-11D-1912-08	110	0.0818181818181818	2.03598488646161
		HNSC	TCGA-D6-8568-01A-11D-2394-08	101	0.138613861386139	2.48842597234197
		HNSC	TCGA-D6-8569-01A-11D-2394-08	141	0.0283687943262411	0.622106493085493
		HNSC	TCGA-D6-A4ZB-01A-11D-A25D-08	195	0.333333333333333	7.03250818270557
		HNSC	TCGA-D6-A6EK-01A-11D-A31L-08	171	0.0760233918128655	1.29398150561782
		HNSC	TCGA-D6-A6EP-01A-11D-A31L-08	125	0.152	3.37714953389267
		HNSC	TCGA-D6-A6ES-01A-12D-A31L-08	209	0.440191387559809	10.9016756883553
		HNSC	TCGA-D6-A74Q-01A-11D-A34J-08	457	0.221006564551422	4.40931619660595
		STAD	TCGA-D7-5577-01A-01D-1600-08	112	0.0535714285714286	0.933159739628239
		STAD	TCGA-D7-5578-01A-01D-1600-08	258	0.0891472868217054	2.38474155682772
		STAD	TCGA-D7-5579-01A-01D-1600-08	163	0.0736196319018405	1.86631947925648
		STAD	TCGA-D7-6518-01A-11D-1800-08	101	0.099009900990099	3.11053246542746
		STAD	TCGA-D7-6524-01A-11D-1800-08	110	0.0272727272727273	1.06646827386084
		STAD	TCGA-D7-6525-01A-11D-1800-08	180	0.0833333333333333	2.19566997559586
		STAD	TCGA-D7-6526-01A-11D-1800-08	217	0.0875576036866359	2.36400467372487
		STAD	TCGA-D7-6527-01A-11D-1800-08	226	0.0929203539823009	4.01976503224472
		STAD	TCGA-D7-6528-01A-11D-1800-08	319	0.0783699059561129	1.72807359190415
		STAD	TCGA-D7-6815-01A-11D-1882-08	157	0.0318471337579618	0.518422077571244
		STAD	TCGA-D7-6818-01A-11D-1882-08	157	0.0382165605095541	1.06646827386084
		STAD	TCGA-D7-6820-01A-11D-1882-08	108	0.111111111111111	2.13293654772169
		STAD	TCGA-D7-6822-01A-11D-1882-08	237	0.0506329113924051	1.35732325764107
		STAD	TCGA-D7-8570-01A-11D-2340-08	134	0.0895522388059701	1.06646827386084
		STAD	TCGA-D7-8572-01A-11D-2340-08	192	0.0677083333333333	1.04353347227244
		STAD	TCGA-D7-8579-01A-11D-2340-08	106	0.0188679245283019	0.82947532411399
		STAD	TCGA-D7-A4YT-01A-11D-A25D-08	299	0.103678929765886	1.60710844047086
		STAD	TCGA-D7-A4YU-01A-21D-A25D-08	242	0.0495867768595041	1.14850429492706
		STAD	TCGA-D7-A4YV-01A-11D-A25D-08	801	0.0112359550561798	0.228528915827324
		STAD	TCGA-D7-A4YY-01A-11D-A25D-08	416	0.00961538461538462	0.203136814068732
		STAD	TCGA-D7-A4Z0-01A-22D-A25D-08	277	0.0216606498194946	1.49305558340518
		STAD	TCGA-D7-A6EV-01A-11D-A31L-08	227	0.066079295154185	1.24421298617099
		STAD	TCGA-D7-A6EX-01A-11D-A31L-08	168	0.0892857142857143	1.77744712310141
		STAD	TCGA-D7-A6EY-01A-21D-A31L-08	1493	0.00937709310113865	0.292755996746114
		STAD	TCGA-D7-A6EZ-01A-11D-A31L-08	316	0.117088607594937	2.14120374364309
		STAD	TCGA-D7-A6F0-01A-11D-A31L-08	150	0.0866666666666667	1.79719653558031
		STAD	TCGA-D7-A747-01A-22D-A33T-08	113	0.0707964601769911	1.42195769848113
		STAD	TCGA-D7-A74A-01A-11D-A32N-08	184	0.293478260869565	12.2159093187697
		BRCA	TCGA-D8-A147-01A-11D-A10Y-09	118	0.203389830508475	4.59401717970825
		BRCA	TCGA-D8-A1J8-01A-11D-A13L-09	636	0.424528301886792	11.1979168755389
		BRCA	TCGA-D8-A1J9-01A-11D-A13L-09	158	0.556962025316456	31.2830693665848
		BRCA	TCGA-D8-A1JA-01A-11D-A13L-09	844	0.677725118483412	33.8899918138002
		BRCA	TCGA-D8-A1JG-01B-11D-A13L-09	103	0.0970873786407767	2.48842597234197
		BRCA	TCGA-D8-A1JK-01A-11D-A13L-09	162	0.104938271604938	2.22648639630597
		BRCA	TCGA-D8-A1JL-01A-11D-A13L-09	106	0.0660377358490566	1.0246459886114
		BRCA	TCGA-D8-A1JN-01A-11D-A13L-09	149	0.496644295302013	23.0179402441632
		BRCA	TCGA-D8-A1JP-01A-11D-A13L-09	114	0.105263157894737	1.10596709881865
		BRCA	TCGA-D8-A1XK-01A-21D-A14K-09	792	0.0151515151515152	0.678661628820537
		BRCA	TCGA-D8-A1XQ-01A-11D-A14K-09	581	0.0464716006884682	0.861378221195298
		BRCA	TCGA-D8-A1Y1-01A-21D-A14K-09	171	0.087719298245614	2.48842597234197
		BRCA	TCGA-D8-A27G-01A-11D-A16D-09	891	0.635241301907969	35.2112275086389
		BRCA	TCGA-D8-A27H-01A-11D-A16D-09	113	0.185840707964602	2.2720411051818
		BRCA	TCGA-D8-A27V-01A-12D-A17D-09	211	0.559241706161137	22.5872511335656
		SKCM	TCGA-D9-A148-06A-11D-A19A-08	332	0.177710843373494	2.19130048310711
		SKCM	TCGA-D9-A149-06A-11D-A196-08	259	0.131274131274131	2.06357275755188
		SKCM	TCGA-D9-A1JW-06A-11D-A19A-08	1018	0.129666011787819	1.83504038183877
		SKCM	TCGA-D9-A1JX-06A-11D-A19A-08	202	0.163366336633663	3.0414095217513
		SKCM	TCGA-D9-A3Z1-06A-11D-A23B-08	573	0.148342059336824	1.85540533025498
		SKCM	TCGA-D9-A3Z3-06A-11D-A23B-08	153	0.169934640522876	1.96057803881489
		SKCM	TCGA-D9-A3Z4-01A-11D-A23B-08	172	0.127906976744186	1.40372747157752
		SKCM	TCGA-D9-A4Z3-01A-11D-A25O-08	917	0.099236641221374	1.33203978519482
		SKCM	TCGA-D9-A4Z6-06A-12D-A25O-08	274	0.145985401459854	2.11780933816338
		SKCM	TCGA-D9-A6E9-06A-12D-A30X-08	186	0.161290322580645	2.13293654772169
		SKCM	TCGA-D9-A6EA-06A-11D-A30X-08	739	0.182679296346414	2.68750005012933
		SKCM	TCGA-D9-A6EC-06A-11D-A30X-08	5153	0.125946050844168	2.45812550388119
		SKCM	TCGA-DA-A1HV-06A-21D-A196-08	1524	0.195538057742782	2.51373199917935
		SKCM	TCGA-DA-A1HW-06A-11D-A19A-08	346	0.170520231213873	1.98401530227265
		SKCM	TCGA-DA-A1HY-06A-11D-A19A-08	832	0.133413461538462	1.79360573331142
		SKCM	TCGA-DA-A1I0-06A-11D-A20D-08	551	0.14519056261343	1.77744712310141
		SKCM	TCGA-DA-A1I1-06A-12D-A196-08	436	0.158256880733945	1.88682848452303
		SKCM	TCGA-DA-A1I2-06A-21D-A19A-08	154	0.162337662337662	2.70481083950214
		SKCM	TCGA-DA-A1I4-06A-11D-A196-08	294	0.129251700680272	1.45477210690761
		SKCM	TCGA-DA-A1I5-06A-11D-A197-08	469	0.181236673773987	3.11053246542746
		SKCM	TCGA-DA-A1I7-06A-22D-A197-08	524	0.158396946564885	2.24499299678678
		SKCM	TCGA-DA-A1I8-06A-11D-A197-08	216	0.157407407407407	1.72666291958422
		SKCM	TCGA-DA-A1IA-06A-11D-A196-08	418	0.186602870813397	2.73376374426301
		SKCM	TCGA-DA-A1IC-06A-11D-A197-08	1126	0.143872113676732	1.83238639781545
		SKCM	TCGA-DA-A3F3-06A-11D-A20D-08	337	0.169139465875371	2.40407254955072
		SKCM	TCGA-DA-A3F5-06A-11D-A20D-08	399	0.145363408521303	1.85036803071582
		SKCM	TCGA-DA-A3F8-06A-11D-A20D-08	1320	0.174242424242424	2.39471955497344
		READ	TCGA-DC-6682-01A-11D-1826-10	112	0.0535714285714286	1.24421298617099
		LIHC	TCGA-DD-A113-01A-11D-A12Z-10	544	0.0220588235294118	0.622106493085493
		LIHC	TCGA-DD-A114-01A-11D-A12Z-10	355	0.0140845070422535	0.654848940089992
		LIHC	TCGA-DD-A115-01A-11D-A12Z-10	279	0.025089605734767	0.497685194468394
		LIHC	TCGA-DD-A116-01A-11D-A12Z-10	629	0.041335453100159	1.01092305126393
		LIHC	TCGA-DD-A118-01A-11D-A12Z-10	515	0.00970873786407767	0.497685194468394
		LIHC	TCGA-DD-A119-01A-11D-A12Z-10	429	0.0186480186480186	0.796296311149431
		LIHC	TCGA-DD-A11A-01A-11D-A12Z-10	895	0.0502793296089385	1.33308534232606
		LIHC	TCGA-DD-A11B-01A-11D-A12Z-10	268	0.0111940298507463	0.373263895851296
		LIHC	TCGA-DD-A11C-01A-11D-A12Z-10	1169	0.0171086398631309	0.36327386457547
		LIHC	TCGA-DD-A11D-01A-11D-A12Z-10	550	0.0381818181818182	0.842853958373893
		LIHC	TCGA-DD-A1E9-01A-21D-A152-10	175	0.0285714285714286	0.888723561550704
		LIHC	TCGA-DD-A1EA-01A-11D-A12Z-10	451	0.0177383592017738	0.56878307939245
		LIHC	TCGA-DD-A1EB-01A-11D-A12Z-10	521	0.0307101727447217	0.737311399212436
		LIHC	TCGA-DD-A1EC-01A-21D-A12Z-10	264	0.0265151515151515	1.33992167741491
		LIHC	TCGA-DD-A1ED-01A-11D-A152-10	130	0.0230769230769231	0.574252147463532
		LIHC	TCGA-DD-A1EF-01A-11D-A12Z-10	548	0.0218978102189781	0.46657986981412
		LIHC	TCGA-DD-A1EG-01A-11D-A20W-10	270	0.037037037037037	0.888723561550704
		LIHC	TCGA-DD-A1EH-01A-11D-A12Z-10	318	0.0220125786163522	0.916788516125989
		LIHC	TCGA-DD-A1EI-01A-11D-A12Z-10	358	0.00837988826815642	0.414737662056995
		LIHC	TCGA-DD-A1EJ-01A-11D-A152-10	252	0.0119047619047619	0.339330814410269
		LIHC	TCGA-DD-A1EK-01A-11D-A20W-10	217	0.0368663594470046	1.80976434352143
		LIHC	TCGA-DD-A1EL-01A-11D-A152-10	1142	0.0157618213660245	0.526960794143006
		LIHC	TCGA-DD-A39V-01A-11D-A20W-10	247	0.00809716599190283	0.355489424620282
		LIHC	TCGA-DD-A39W-01A-11D-A20W-10	183	0.00546448087431694	0.130969788017998
		LIHC	TCGA-DD-A39X-01A-11D-A20W-10	192	0.0208333333333333	0.765669529951376
		LIHC	TCGA-DD-A39Y-01A-11D-A20W-10	318	0.0125786163522013	0.398148155574715
		LIHC	TCGA-DD-A39Z-01A-11D-A20W-10	262	0.0381679389312977	1.24421298617099
		LIHC	TCGA-DD-A3A0-01A-11D-A20W-10	330	0.0272727272727273	0.678661628820537
		LIHC	TCGA-DD-A3A1-01A-11D-A20W-10	265	0.0339622641509434	1.11979168755389
		LIHC	TCGA-DD-A3A2-01A-11D-A20W-10	211	0.028436018957346	0.622106493085493
		LIHC	TCGA-DD-A3A3-01A-11D-A22F-10	107	0.0560747663551402	1.65895064822798
		LIHC	TCGA-DD-A3A4-01A-11D-A22F-10	157	0.0254777070063694	1.24421298617099
		LIHC	TCGA-DD-A3A5-01A-11D-A22F-10	155	0.0258064516129032	0.710978849240563
		LIHC	TCGA-DD-A3A6-01A-11D-A22F-10	102	0	0
		LIHC	TCGA-DD-A3A7-01A-11D-A22F-10	221	0.0226244343891403	0.691229436761659
		LIHC	TCGA-DD-A3A8-01A-11D-A22F-10	224	0.0803571428571429	1.94746380444154
		LIHC	TCGA-DD-A3A9-01A-11D-A25V-10	457	0.074398249452954	0.961437307495761
		LIHC	TCGA-DD-A4NF-01A-11D-A27I-10	166	0.0301204819277108	0.355489424620282
		LIHC	TCGA-DD-A4NI-01A-11D-A27I-10	202	0.0297029702970297	0.574252147463532
		LIHC	TCGA-DD-A4NJ-01A-11D-A27I-10	107	0.0654205607476635	1.16126545375959
		LIHC	TCGA-DD-A4NK-01A-11D-A28X-10	112	0.0535714285714286	0.785818728107991
		LIHC	TCGA-DD-A4NQ-01A-21D-A28X-10	128	0.046875	0.995370388936788
		LIHC	TCGA-DD-A4NV-01A-11D-A30V-10	158	0.069620253164557	1.19011676938094
		LIHC	TCGA-DD-A73A-01A-12D-A32G-10	113	0.0707964601769911	1.99074077787358
		LIHC	TCGA-DD-A73E-01A-12D-A32G-10	182	0.043956043956044	0.865539468640686
		LIHC	TCGA-DD-A73F-01A-11D-A32G-10	123	0.040650406504065	0.95708691243922
		LIHC	TCGA-DD-A73G-01A-22D-A32G-10	132	0.0681818181818182	0.772270129347508
		CESC	TCGA-DG-A2KJ-01A-11D-A18J-09	137	0.255474452554745	6.22106493085493
		CESC	TCGA-DG-A2KK-01A-11D-A17W-09	487	0.515400410677618	19.5185912205573
		CESC	TCGA-DG-A2KL-01A-11D-A17W-09	263	0.399239543726236	15.369689829171
		CESC	TCGA-DG-A2KM-01A-11D-A17W-09	255	0.517647058823529	23.4623020249386
		UCEC	TCGA-DI-A0WH-01A-12D-A12J-09	1519	0.0190915075707702	0.352021235111791
		BLCA	TCGA-DK-A1A3-01A-11D-A13W-08	687	0.478893740902475	11.6956020700073
		BLCA	TCGA-DK-A1A5-01A-11D-A13W-08	305	0.537704918032787	17.0042441443368
		BLCA	TCGA-DK-A1A6-01A-11D-A13W-08	333	0.417417417417417	9.3484110852847
		BLCA	TCGA-DK-A1A7-01A-11D-A13W-08	234	0.128205128205128	2.07368831028498
		BLCA	TCGA-DK-A1AB-01A-11D-A13W-08	218	0.660550458715596	35.8333340017244
		BLCA	TCGA-DK-A1AC-01A-11D-A13W-08	1647	0.5591985428051	18.4825832300561
		BLCA	TCGA-DK-A1AD-01A-11D-A13W-08	255	0.341176470588235	7.46527791702591
		BLCA	TCGA-DK-A1AE-01A-11D-A13W-08	125	0.392	13.5480969605285
		BLCA	TCGA-DK-A1AF-01A-11D-A13W-08	133	0.56390977443609	14.3563036865883
		BLCA	TCGA-DK-A1AG-01A-11D-A13W-08	118	0.491525423728814	20.6183866279763
		BLCA	TCGA-DK-A2HX-01A-12D-A18F-08	124	0.395161290322581	9.37945174190435
		BLCA	TCGA-DK-A2I1-01A-11D-A17V-08	260	0.515384615384615	19.6146517819897
		BLCA	TCGA-DK-A2I2-01A-11D-A17V-08	136	0.308823529411765	6.53211817739767
		BLCA	TCGA-DK-A2I4-01A-11D-A21A-08	1074	0.601489757914339	26.7920529688819
		BLCA	TCGA-DK-A2I6-01A-12D-A18F-08	309	0.27831715210356	4.28009267242819
		BLCA	TCGA-DK-A3IK-01A-32D-A21A-08	235	0.276595744680851	4.0436922050557
		BLCA	TCGA-DK-A3IL-01A-11D-A20D-08	187	0.106951871657754	1.50813695293453
		BLCA	TCGA-DK-A3IN-01A-11D-A20D-08	445	0.557303370786517	24.6851856456324
		BLCA	TCGA-DK-A3IQ-01A-31D-A20D-08	220	0.486363636363636	17.7507719360394
		BLCA	TCGA-DK-A3IS-01A-21D-A21A-08	380	0.542105263157895	26.9797763317077
		BLCA	TCGA-DK-A3IT-01A-31D-A20D-08	439	0.567198177676538	23.8314641197366
		BLCA	TCGA-DK-A3IU-01A-11D-A20D-08	503	0.52882703777336	20.6850408950926
		BLCA	TCGA-DK-A3IV-01A-22D-A21A-08	104	0.336538461538462	4.58394258062995
		BLCA	TCGA-DK-A3WW-01A-22D-A23M-08	1327	0.626224566691786	30.8639101942713
		BLCA	TCGA-DK-A3X1-01A-12D-A22Z-08	952	0.545168067226891	31.4998312108654
		BLCA	TCGA-DK-A3X2-01A-11D-A22Z-08	148	0.195945945945946	3.60821765989586
		BLCA	TCGA-DK-A6AV-01A-12D-A30E-08	131	0.312977099236641	5.6680813814456
		BLCA	TCGA-DK-A6AW-01A-11D-A30E-08	3881	0.051017778922958	2.98611116681036
		BLCA	TCGA-DK-A6B1-01A-12D-A30E-08	146	0.287671232876712	14.9305558340518
		BLCA	TCGA-DK-A6B2-01A-11D-A30E-08	218	0.261467889908257	5.91001168431218
		BLCA	TCGA-DK-A6B5-01A-11D-A31L-08	139	0.402877697841727	9.95370388936788
		BLCA	TCGA-DK-A6B6-01A-11D-A30E-08	1064	0.62593984962406	32.4959156388187
		COAD	TCGA-DM-A0X9-01A-11D-A152-10	128	0.046875	0.995370388936788
		COAD	TCGA-DM-A0XD-01A-12D-A152-10	141	0.0851063829787234	2.71464651528215
		COAD	TCGA-DM-A1D4-01A-21D-A152-10	147	0.0340136054421769	1.1311027147009
		COAD	TCGA-DM-A1D7-01A-11D-A152-10	119	0.0588235294117647	1.16126545375959
		COAD	TCGA-DM-A1D8-01A-11D-A152-10	127	0.0551181102362205	2.17737272579922
		COAD	TCGA-DM-A1D9-01A-11D-A152-10	103	0.0679611650485437	1.08868636289961
		COAD	TCGA-DM-A1DA-01A-11D-A152-10	257	0.0233463035019455	0.426587309544338
		COAD	TCGA-DM-A1HA-01A-11D-A152-10	136	0.0661764705882353	1.31740198535751
		COAD	TCGA-DM-A28F-01A-11D-A16V-10	185	0.0972972972972973	2.13293654772169
		HNSC	TCGA-DQ-5624-01A-01D-1870-08	102	0.333333333333333	9.40072033995856
		HNSC	TCGA-DQ-5625-01A-01D-1870-08	194	0.335051546391753	8.98598267790156
		HNSC	TCGA-DQ-5629-01A-01D-1870-08	350	0.117142857142857	2.21794488839176
		HNSC	TCGA-DQ-7588-01A-11D-2078-08	111	0.243243243243243	4.7991072323738
		HNSC	TCGA-DQ-7589-01A-11D-2229-08	377	0.0742705570291777	1.58354380058125
		HNSC	TCGA-DQ-7594-01A-11D-2229-08	370	0.562162162162162	28.755144569285
		HNSC	TCGA-DQ-7595-01A-11D-2229-08	345	0.0753623188405797	1.17634682328893
		CESC	TCGA-DR-A0ZM-01A-12D-A10S-08	1734	0.66724336793541	46.4372395161235
		CESC	TCGA-DS-A0VK-01A-21D-A10S-08	182	0.445054945054945	16.7968753133083
		CESC	TCGA-DS-A0VL-01A-21D-A10S-08	171	0.380116959064327	13.4789740168523
		CESC	TCGA-DS-A0VM-01A-11D-A10S-08	364	0.568681318681319	30.3002456632228
		CESC	TCGA-DS-A0VN-01A-21D-A10S-08	166	0.457831325301205	18.912037389799
		CESC	TCGA-DS-A1OA-01A-11D-A16Y-08	533	0.0769230769230769	1.59414788853157
		CESC	TCGA-DS-A1OB-01A-11D-A16Y-08	1314	0.311263318112633	8.48138518906555
		CESC	TCGA-DS-A1OC-01A-11D-A14W-08	773	0.178525226390686	3.30194984791531
		CESC	TCGA-DS-A1OD-01A-11D-A14W-08	937	0.0522945570971185	0.945216067013617
		CESC	TCGA-DS-A5RQ-01A-11D-A28B-09	137	0.335766423357664	12.7186216364145
		CESC	TCGA-DS-A7WH-01A-22D-A351-09	165	0.327272727272727	12.2159093187697
		LGG	TCGA-DU-6392-01A-11D-1705-08	14763	0.0272979746663957	0.428196271073362
		LGG	TCGA-DU-6407-02B-11D-A36O-08	2711	0.0933234968646256	0.862427083565094
		KIRP	TCGA-DW-7837-01A-11D-2136-08	166	0.0180722891566265	1.06646827386084
		KIRP	TCGA-DW-7838-01A-11D-2136-08	113	0.0884955752212389	1.18496474873427
		KIRP	TCGA-DW-7840-01A-11D-2136-08	108	0.0648148148148148	1.24421298617099
		SARC	TCGA-DX-A1KU-01A-32D-A24N-09	124	0.0806451612903226	2.07368831028498
		SARC	TCGA-DX-A1KW-01A-22D-A24N-09	116	0.103448275862069	2.98611116681036
		SARC	TCGA-DX-A1KX-01A-22D-A24N-09	153	0.0588235294117647	1.01799244323081
		SARC	TCGA-DX-A1KY-01A-11D-A24N-09	335	0.0686567164179104	1.21774036944394
		SARC	TCGA-DX-A1KZ-01A-11D-A24N-09	139	0.0719424460431655	1.24421298617099
		SARC	TCGA-DX-A1L0-01A-11D-A24N-09	153	0.130718954248366	1.91417382487844
		SARC	TCGA-DX-A1L1-01A-11D-A24N-09	201	0.0398009950248756	0.796296311149431
		SARC	TCGA-DX-A1L2-01A-22D-A24N-09	188	0.117021276595745	1.88777142729391
		SARC	TCGA-DX-A1L3-01A-11D-A24N-09	126	0.0873015873015873	1.3034612236077
		SARC	TCGA-DX-A1L4-01A-12D-A26G-09	127	0.0551181102362205	0.669960838707454
		SARC	TCGA-DX-A23R-01A-11D-A26G-09	104	0.0576923076923077	1.14850429492706
		SARC	TCGA-DX-A23U-01A-11D-A26G-09	126	0.0634920634920635	1.04775830414399
		SARC	TCGA-DX-A3LS-01A-11D-A21Q-09	104	0.192307692307692	4.97685194468394
		SARC	TCGA-DX-A3LT-01A-12D-A21Q-09	131	0.0381679389312977	0.654848940089992
		SARC	TCGA-DX-A3M1-01A-11D-A228-09	102	0.127450980392157	2.31068126003183
		SARC	TCGA-DX-A3M2-01A-21D-A228-09	133	0.0075187969924812	0.414737662056995
		SARC	TCGA-DX-A3U9-01A-11D-A307-09	124	0.0806451612903226	1.30969788017998
		SARC	TCGA-DX-A3UE-01A-11D-A307-09	107	0.0467289719626168	0.731889991865286
		SARC	TCGA-DX-A48L-01A-11D-A307-09	189	0.037037037037037	1.93544242293264
		SARC	TCGA-DX-A48R-01A-11D-A307-09	103	0.087378640776699	1.59970241079127
		SARC	TCGA-DX-A6B9-01A-12D-A32I-09	108	0.0277777777777778	1.49305558340518
		SARC	TCGA-DX-A6BF-01A-11D-A307-09	115	0.11304347826087	3.59439307116062
		SARC	TCGA-DX-A6YQ-01A-12D-A33E-09	333	0.018018018018018	0.710978849240563
		SARC	TCGA-DX-A6YR-01A-33D-A351-09	109	0.018348623853211	0.82947532411399
		SARC	TCGA-DX-A6YS-01A-12D-A351-09	4460	0.00112107623318386	0.731889991865286
		SARC	TCGA-DX-A6YT-01A-21D-A351-09	2435	0.00164271047227926	0.622106493085493
		SARC	TCGA-DX-A6YU-01A-12D-A33E-09	127	0.031496062992126	0.710978849240563
		SARC	TCGA-DX-A6YV-01A-12D-A351-09	11220	0.00035650623885918	0.523879152071994
		SARC	TCGA-DX-A6YZ-01A-12D-A351-09	134	0.0149253731343284	0.216384867160171
		SARC	TCGA-DX-A6Z0-01A-13D-A36J-09	133	0	0
		SARC	TCGA-DX-A6Z2-01A-12D-A36J-09	119	0.0672268907563025	1.32716051858238
		SARC	TCGA-DX-A7EL-01A-12D-A36J-09	139	0.0359712230215827	0.518422077571244
		SARC	TCGA-DX-A7EM-01A-11D-A36J-09	164	0.0365853658536585	0.622106493085493
		SARC	TCGA-DX-A7ER-01A-11D-A36J-09	103	0.0194174757281553	0.414737662056995
		SARC	TCGA-DX-A7ET-01A-11D-A36J-09	141	0.0212765957446809	0.533234136930422
		SARC	TCGA-DX-A7EU-01A-22D-A36J-09	168	0.0357142857142857	0.678661628820537
		SARC	TCGA-DX-A8BG-01A-12D-A417-09	152	0.0921052631578947	1.58354380058125
		SARC	TCGA-DX-A8BH-01A-11D-A37C-09	120	0.0666666666666667	0.82947532411399
		SARC	TCGA-DX-A8BJ-01A-11D-A417-09	126	0.0476190476190476	1.06646827386084
		SARC	TCGA-DX-A8BL-01A-11D-A417-09	171	0.0350877192982456	0.622106493085493
		SARC	TCGA-DX-A8BM-01A-11D-A417-09	132	0.053030303030303	1.16126545375959
		SARC	TCGA-DX-A8BP-01A-11D-A37C-09	951	0.123028391167192	1.63565077957309
		SARC	TCGA-DX-A8BR-01A-11D-A417-09	111	0.0630630630630631	1.58354380058125
		SARC	TCGA-DX-A8BT-01A-11D-A37C-09	204	0.0392156862745098	1.17102398698446
		SARC	TCGA-DX-A8BU-01A-11D-A37C-09	162	0.037037037037037	0.710978849240563
		SARC	TCGA-DX-A8BV-01A-11D-A37C-09	133	0.0601503759398496	1.10596709881865
		SARC	TCGA-DX-A8BX-01A-11D-A37C-09	146	0.0821917808219178	1.29830920296103
		SARC	TCGA-DX-A8BZ-01A-11D-A37C-09	117	0.0256410256410256	0.392909364053995
		SARC	TCGA-DX-AATS-01A-12D-A417-09	180	0.0666666666666667	1.86631947925648
		SARC	TCGA-DX-AB2E-01A-11D-A38Z-09	1254	0.162679425837321	2.10638547036416
		SARC	TCGA-DX-AB2H-01A-11D-A38Z-09	108	0.0462962962962963	1.77744712310141
		SARC	TCGA-DX-AB2P-01A-11D-A387-09	132	0.0227272727272727	0.82947532411399
		SARC	TCGA-DX-AB2Q-01A-11D-A38Z-09	158	0.0949367088607595	1.96454682026998
		SARC	TCGA-DX-AB2T-01A-11D-A387-09	111	0.0540540540540541	1.49305558340518
		SARC	TCGA-DX-AB2V-01A-11D-A417-09	152	0.0789473684210526	1.99074077787358
		SARC	TCGA-DX-AB2W-01A-11D-A38Z-09	203	0.0886699507389163	1.94746380444154
		SARC	TCGA-DX-AB2X-01A-11D-A387-09	116	0.0172413793103448	0.414737662056995
		SARC	TCGA-DX-AB2Z-01A-11D-A387-09	172	0.0465116279069767	1.24421298617099
		SARC	TCGA-DX-AB32-01A-11D-A417-09	435	0.0160919540229885	0.527847933527085
		SARC	TCGA-DX-AB35-01A-21D-A417-09	101	0.0693069306930693	1.24421298617099
		SARC	TCGA-DX-AB37-01A-11D-A417-09	125	0.064	0.796296311149431
		READ	TCGA-DY-A0XA-01A-11D-A152-10	118	0.110169491525424	1.61747688202228
		READ	TCGA-DY-A1DC-01A-31D-A152-10	121	0.0743801652892562	1.49305558340518
		READ	TCGA-DY-A1DF-01A-11D-A152-10	101	0.0495049504950495	1.77744712310141
		READ	TCGA-DY-A1DG-01A-11D-A152-10	135	0.0814814814814815	2.48842597234197
		KIRP	TCGA-DZ-6131-01A-11D-1961-08	313	0.0191693290734824	2.98611116681036
		KIRP	TCGA-DZ-6132-01A-11D-1961-08	582	0.013745704467354	0.904882171760717
		KIRP	TCGA-DZ-6133-01A-11D-1961-08	1010	0.00693069306930693	0.87094909031969
		KIRP	TCGA-DZ-6135-01A-11D-1961-08	129	0.0155038759689922	0.552983549409327
		BRCA	TCGA-E2-A10C-01A-21D-A10M-09	338	0.64792899408284	49.5422989038992
		BRCA	TCGA-E2-A14R-01A-11D-A10Y-09	102	0.107843137254902	2.48842597234197
		BRCA	TCGA-E2-A152-01A-11D-A12B-09	108	0.518518518518518	12.66835040465
		BRCA	TCGA-E2-A159-01A-11D-A10Y-09	143	0.517482517482518	23.0179402441632
		BRCA	TCGA-E2-A15I-01A-21D-A135-09	137	0.0291970802919708	0.904882171760717
		BRCA	TCGA-E2-A1IN-01A-11D-A13L-09	190	0.542105263157895	18.3077053679445
		BRCA	TCGA-E2-A1LG-01A-21D-A14K-09	134	0.544776119402985	18.1655095980964
		BRCA	TCGA-E2-A1LH-01A-11D-A14G-09	143	0.181818181818182	2.94086705822233
		BRCA	TCGA-E2-A2P6-01A-11D-A19Y-09	137	0.583941605839416	19.9074077787358
		BRCA	TCGA-E2-A574-01A-11D-A29N-09	101	0.277227722772277	9.95370388936788
		BLCA	TCGA-E5-A2PC-01A-11D-A202-08	238	0.23109243697479	4.27698213996276
		BLCA	TCGA-E5-A4TZ-01A-11D-A31L-08	531	0.455743879472693	20.765485700233
		BLCA	TCGA-E5-A4U1-01A-11D-A31L-08	708	0.555084745762712	20.8074767474552
		UCEC	TCGA-E6-A1LZ-01A-11D-A142-09	278	0.435251798561151	16.7277523696321
		BLCA	TCGA-E7-A3X6-01A-12D-A22Z-08	128	0.5390625	34.3402784183192
		BLCA	TCGA-E7-A3Y1-01A-11D-A22Z-08	177	0.129943502824859	1.97357921944363
		BLCA	TCGA-E7-A4IJ-01A-31D-A26M-08	372	0.373655913978495	9.88260600444383
		BLCA	TCGA-E7-A541-01A-11D-A26M-08	492	0.32520325203252	7.10978849240563
		BLCA	TCGA-E7-A5KE-01A-11D-A289-08	215	0.246511627906977	4.54781298393533
		BLCA	TCGA-E7-A5KF-01A-11D-A289-08	222	0.522522522522523	16.9798478112746
		BLCA	TCGA-E7-A677-01A-11D-A30E-08	256	0.125	1.65895064822798
		BLCA	TCGA-E7-A6ME-01A-22D-A32B-08	140	0.1	1.33992167741491
		BLCA	TCGA-E7-A7DU-01A-11D-A32B-08	274	0.583941605839416	24.8842597234197
		BLCA	TCGA-E7-A7DV-01A-11D-A339-08	339	0.551622418879056	24.4913503593657
		BRCA	TCGA-E9-A1RF-01A-11D-A159-09	117	0.0854700854700855	1.08192433580086
		CESC	TCGA-EA-A3HQ-01A-11D-A20U-09	138	0.173913043478261	5.97222233362073
		CESC	TCGA-EA-A3HR-01A-11D-A20U-09	135	0.281481481481481	23.6400467372487
		CESC	TCGA-EA-A3HS-01A-11D-A20U-09	834	0.0383693045563549	1.07607609614788
		CESC	TCGA-EA-A3HT-01A-61D-A21Q-09	158	0.284810126582278	10.1799244323081
		CESC	TCGA-EA-A3HU-01A-11D-A20U-09	1342	0.249627421758569	8.3362270073456
		CESC	TCGA-EA-A3QD-01A-32D-A22X-09	177	0.299435028248588	8.7924384356083
		CESC	TCGA-EA-A3QE-01A-21D-A21Q-09	103	0.271844660194175	6.96759272255752
		CESC	TCGA-EA-A3Y4-01A-51D-A243-09	200	0.505	13.9628346225855
		CESC	TCGA-EA-A410-01A-11D-A243-09	1553	0.0128783000643915	0.282775678675224
		CESC	TCGA-EA-A439-01A-11D-A243-09	182	0.263736263736264	6.28654982486393
		CESC	TCGA-EA-A43B-01A-81D-A243-09	291	0.512027491408935	20.5986372154974
		CESC	TCGA-EA-A50E-01A-21D-A26G-09	198	0.262626262626263	6.81042897693592
		CESC	TCGA-EA-A6QX-01A-12D-A33O-09	292	0.14041095890411	14.5750664094315
		CESC	TCGA-EA-A78R-01A-11D-A32I-09	173	0.144508670520231	7.77633116356866
		SKCM	TCGA-EB-A1NK-01A-11D-A196-08	150	0.173333333333333	2.08706694454488
		SKCM	TCGA-EB-A24D-01A-11D-A197-08	685	0.159124087591241	2.0241673954125
		SKCM	TCGA-EB-A299-01A-21D-A197-08	189	0.142857142857143	2.23958337510777
		SKCM	TCGA-EB-A3XB-01A-11D-A23B-08	556	0.169064748201439	2.51518324086178
		SKCM	TCGA-EB-A3XC-01A-11D-A23B-08	460	0.139130434782609	1.94218612475471
		SKCM	TCGA-EB-A3XD-01A-22D-A23B-08	441	0.149659863945578	1.90972225784384
		SKCM	TCGA-EB-A3XF-01A-31D-A23B-08	448	0.178571428571429	2.84391539696225
		SKCM	TCGA-EB-A3Y6-01A-21D-A23B-08	633	0.164296998420221	2.13881240597988
		SKCM	TCGA-EB-A3Y7-01A-11D-A23B-08	1206	0.191542288557214	3.05758723197338
		SKCM	TCGA-EB-A41A-01A-11D-A24R-08	1995	0.178947368421053	2.38168383948012
		SKCM	TCGA-EB-A41B-01A-11D-A24R-08	407	0.186732186732187	2.59069005339712
		SKCM	TCGA-EB-A42Z-01A-12D-A24R-08	125	0.096	1.42195769848113
		SKCM	TCGA-EB-A430-01A-11D-A24R-08	431	0.122969837587007	1.62822933992746
		SKCM	TCGA-EB-A431-01A-11D-A25O-08	1961	0.172870984191739	2.34979499895245
		SKCM	TCGA-EB-A44N-01A-11D-A25O-08	181	0.160220994475138	2.00456536660881
		SKCM	TCGA-EB-A44O-01A-11D-A25O-08	577	0.12998266897747	1.51733290996462
		SKCM	TCGA-EB-A44P-01A-11D-A25O-08	378	0.134920634920635	1.71499627823568
		SKCM	TCGA-EB-A4IS-01A-21D-A25O-08	640	0.1484375	1.70072278685243
		SKCM	TCGA-EB-A4P0-01A-41D-A25O-08	226	0.141592920353982	2.2751323175698
		SKCM	TCGA-EB-A4XL-01A-11D-A27K-08	518	0.164092664092664	2.13652734999058
		SKCM	TCGA-EB-A551-01A-21D-A27K-08	394	0.175126903553299	2.28935189455461
		SKCM	TCGA-EB-A553-01A-12D-A27K-08	361	0.127423822714681	1.61221964405254
		SKCM	TCGA-EB-A5FP-01A-11D-A27K-08	437	0.183066361556064	2.42773265594339
		SKCM	TCGA-EB-A5SE-01A-11D-A30X-08	324	0.166666666666667	1.63871954276179
		SKCM	TCGA-EB-A5SG-06A-11D-A30X-08	336	0.163690476190476	2.1724353726795
		SKCM	TCGA-EB-A5SH-06A-11D-A30X-08	104	0.0673076923076923	1.33992167741491
		SKCM	TCGA-EB-A5UL-06A-11D-A30X-08	532	0.118421052631579	1.5369689829171
		SKCM	TCGA-EB-A5UM-01A-11D-A30X-08	603	0.135986733001658	1.82188330117894
		SKCM	TCGA-EB-A5UN-06A-11D-A30X-08	802	0.138403990024938	1.71562287534136
		SKCM	TCGA-EB-A6QY-01A-12D-A32N-08	728	0.159340659340659	2.06183866279763
		SKCM	TCGA-EB-A6QZ-01A-12D-A32N-08	324	0.135802469135802	1.95519183541155
		SKCM	TCGA-EB-A6R0-01A-12D-A32N-08	436	0.169724770642202	2.5935707317367
		LIHC	TCGA-ED-A459-01A-11D-A25V-10	284	0.0246478873239437	0.967721211466322
		LIHC	TCGA-ED-A4XI-01A-11D-A25V-10	194	0.0463917525773196	1.24421298617099
		LIHC	TCGA-ED-A66Y-01A-11D-A30V-10	101	0.0099009900990099	0.248842597234197
		LIHC	TCGA-ED-A7PZ-01A-11D-A33Q-10	299	0.0301003344481605	1.11979168755389
		SKCM	TCGA-EE-A17X-06A-11D-A197-08	883	0.183465458663647	2.79947921888472
		SKCM	TCGA-EE-A17Y-06A-11D-A196-08	193	0.16580310880829	2.65432103716477
		SKCM	TCGA-EE-A180-06A-11D-A21A-08	582	0.144329896907216	2.09027781676726
		SKCM	TCGA-EE-A181-06A-11D-A196-08	3369	0.176313446126447	2.23958337510777
		SKCM	TCGA-EE-A182-06A-11D-A196-08	1576	0.186548223350254	2.56700784515277
		SKCM	TCGA-EE-A183-06A-11D-A196-08	883	0.15515288788222	2.35113350490241
		SKCM	TCGA-EE-A184-06A-11D-A196-08	379	0.029023746701847	1.44066766819798
		SKCM	TCGA-EE-A185-06A-11D-A196-08	220	0.163636363636364	1.94746380444154
		SKCM	TCGA-EE-A20B-06A-11D-A196-08	197	0.142131979695431	2.32253090751917
		SKCM	TCGA-EE-A20C-06A-11D-A196-08	2394	0.144945697577277	1.99880512130246
		SKCM	TCGA-EE-A20F-06A-21D-A196-08	534	0.174157303370787	2.16283752736265
		SKCM	TCGA-EE-A20H-06A-11D-A197-08	659	0.139605462822458	1.97357921944363
		SKCM	TCGA-EE-A29A-06A-12D-A196-08	277	0.173285198555957	1.92652333342604
		SKCM	TCGA-EE-A29B-06A-11D-A197-08	609	0.195402298850575	3.11708095482836
		SKCM	TCGA-EE-A29C-06A-21D-A197-08	467	0.149892933618844	1.74189818063938
		SKCM	TCGA-EE-A29D-06A-11D-A197-08	4152	0.169315992292871	2.23133094203623
		SKCM	TCGA-EE-A29E-06A-11D-A197-08	4010	0.20074812967581	2.66735407155165
		SKCM	TCGA-EE-A29G-06A-12D-A196-08	431	0.132250580046404	1.7089190412469
		SKCM	TCGA-EE-A29H-06A-12D-A197-08	326	0.168711656441718	2.73726856957617
		SKCM	TCGA-EE-A29L-06A-12D-A196-08	2288	0.173513986013986	2.36340935650661
		SKCM	TCGA-EE-A29M-06A-11D-A196-08	2581	0.18752421542038	2.41362358840384
		SKCM	TCGA-EE-A29N-06A-12D-A197-08	723	0.147994467496542	1.7633217155006
		SKCM	TCGA-EE-A29P-06A-11D-A197-08	333	0.144144144144144	1.73107893728137
		SKCM	TCGA-EE-A29Q-06A-11D-A197-08	332	0.159638554216867	2.12720284732459
		SKCM	TCGA-EE-A29R-06A-11D-A197-08	756	0.169312169312169	1.94218612475471
		SKCM	TCGA-EE-A29S-06A-11D-A197-08	1189	0.144659377628259	1.82131603082051
		SKCM	TCGA-EE-A29T-06A-11D-A197-08	403	0.153846153846154	2.85708167194819
		SKCM	TCGA-EE-A29V-06A-12D-A197-08	1175	0.12936170212766	1.51903914777502
		SKCM	TCGA-EE-A29X-06A-11D-A196-08	161	0.149068322981366	2.29700858985413
		SKCM	TCGA-EE-A2A0-06A-11D-A196-08	425	0.143529411764706	2.10824978212306
		SKCM	TCGA-EE-A2A1-06A-11D-A197-08	423	0.156028368794326	1.82484571305078
		SKCM	TCGA-EE-A2A2-06A-11D-A196-08	1872	0.133012820512821	1.74050018852009
		SKCM	TCGA-EE-A2A5-06A-11D-A197-08	375	0.157333333333333	1.70717595776949
		SKCM	TCGA-EE-A2A6-06A-11D-A197-08	326	0.162576687116564	2.27390649196766
		SKCM	TCGA-EE-A2GB-06A-11D-A197-08	722	0.160664819944598	2.22044163685899
		SKCM	TCGA-EE-A2GC-06A-11D-A197-08	2577	0.168800931315483	2.16493059593751
		SKCM	TCGA-EE-A2GD-06A-11D-A196-08	603	0.174129353233831	2.80951319457964
		SKCM	TCGA-EE-A2GE-06A-11D-A196-08	294	0.146258503401361	1.69844947318579
		SKCM	TCGA-EE-A2GH-06A-11D-A196-08	359	0.178272980501393	2.41301912469524
		SKCM	TCGA-EE-A2GI-06A-11D-A196-08	1800	0.165555555555556	2.04848325899974
		SKCM	TCGA-EE-A2GJ-06A-11D-A196-08	1286	0.156298600311042	1.93865744356874
		SKCM	TCGA-EE-A2GL-06A-11D-A196-08	400	0.1275	1.66986479722948
		SKCM	TCGA-EE-A2GM-06B-11D-A196-08	790	0.168354430379747	2.00582214740292
		SKCM	TCGA-EE-A2GN-06A-11D-A196-08	481	0.16008316008316	1.69565309619763
		SKCM	TCGA-EE-A2GO-06A-11D-A196-08	2223	0.142600089968511	1.94773094625285
		SKCM	TCGA-EE-A2GP-06A-11D-A197-08	692	0.15606936416185	2.31681038804252
		SKCM	TCGA-EE-A2GR-06A-11D-A197-08	1856	0.148168103448276	1.80558612768877
		SKCM	TCGA-EE-A2GS-06A-12D-A197-08	361	0.168975069252078	2.26558185541582
		SKCM	TCGA-EE-A2GT-06A-12D-A197-08	390	0.135897435897436	2.19810960890207
		SKCM	TCGA-EE-A2GU-06A-11D-A196-08	646	0.1671826625387	2.33695656532985
		SKCM	TCGA-EE-A2M5-06A-12D-A197-08	2270	0.152863436123348	1.88533583494031
		SKCM	TCGA-EE-A2M6-06A-12D-A197-08	609	0.146141215106732	1.92582531772553
		SKCM	TCGA-EE-A2M8-06A-12D-A196-08	120	0.2	3.51307196095337
		SKCM	TCGA-EE-A2MC-06A-12D-A197-08	843	0.128113879003559	1.73387100008344
		SKCM	TCGA-EE-A2MD-06A-11D-A197-08	1880	0.185106382978723	2.56965055897628
		SKCM	TCGA-EE-A2MF-06A-11D-A21A-08	809	0.164400494437577	2.48842597234197
		SKCM	TCGA-EE-A2MG-06A-11D-A197-08	255	0.129411764705882	1.61015798210363
		SKCM	TCGA-EE-A2MH-06A-11D-A197-08	181	0.12707182320442	1.97357921944363
		SKCM	TCGA-EE-A2MI-06A-11D-A197-08	1212	0.166666666666667	2.12093690469653
		SKCM	TCGA-EE-A2MJ-06A-11D-A197-08	2586	0.180587780355762	2.48842597234197
		SKCM	TCGA-EE-A2MK-06A-11D-A196-08	315	0.193650793650794	2.57277939513322
		SKCM	TCGA-EE-A2ML-06A-11D-A197-08	635	0.143307086614173	1.53004569921027
		SKCM	TCGA-EE-A2MM-06A-11D-A196-08	616	0.150974025974026	2.48842597234197
		SKCM	TCGA-EE-A2MN-06A-11D-A197-08	173	0.179190751445087	1.88149280835612
		SKCM	TCGA-EE-A2MP-06A-11D-A197-08	316	0.126582278481013	1.53133905990275
		SKCM	TCGA-EE-A2MQ-06A-11D-A197-08	281	0.153024911032028	2.43187083660693
		SKCM	TCGA-EE-A2MR-06A-11D-A196-08	5757	0.193850964043773	2.47953873672646
		SKCM	TCGA-EE-A2MS-06A-11D-A197-08	3247	0.170311056359717	1.95468687884249
		SKCM	TCGA-EE-A2MT-06A-11D-A197-08	1035	0.157487922705314	2.16905579407348
		SKCM	TCGA-EE-A2MU-06A-21D-A196-08	755	0.176158940397351	2.46985562926479
		SKCM	TCGA-EE-A3AA-06A-11D-A196-08	1985	0.20352644836272	2.91398287775697
		SKCM	TCGA-EE-A3AB-06A-11D-A196-08	809	0.0865265760197775	1.74189818063938
		SKCM	TCGA-EE-A3AC-06A-11D-A196-08	1122	0.168449197860963	2.1673387501043
		SKCM	TCGA-EE-A3AD-06A-11D-A196-08	494	0.151821862348178	1.72807359190415
		SKCM	TCGA-EE-A3AE-06A-11D-A196-08	1546	0.188874514877102	2.45479859433735
		SKCM	TCGA-EE-A3AF-06A-11D-A196-08	1076	0.116171003717472	1.43342509927533
		SKCM	TCGA-EE-A3AG-06A-31D-A196-08	1918	0.160062565172054	1.98427733378957
		SKCM	TCGA-EE-A3AH-06A-11D-A196-08	417	0.146282973621103	1.66806576167978
		SKCM	TCGA-EE-A3J3-06A-11D-A20D-08	206	0.145631067961165	2.07368831028498
		SKCM	TCGA-EE-A3J4-06A-11D-A20D-08	359	0.139275766016713	2.14519480374308
		SKCM	TCGA-EE-A3J5-06A-11D-A20D-08	2429	0.1547962124331	2.43658376458485
		SKCM	TCGA-EE-A3J7-06A-11D-A20D-08	1154	0.136048526863085	1.60115933466266
		SKCM	TCGA-EE-A3J8-06A-11D-A20D-08	309	0.174757281553398	2.79947921888472
		SKCM	TCGA-EE-A3JA-06A-11D-A20D-08	1109	0.197475202885482	2.67139847030829
		SKCM	TCGA-EE-A3JB-06A-11D-A21A-08	678	0.151917404129794	2.10088422255101
		SKCM	TCGA-EE-A3JD-06A-11D-A20D-08	3476	0.161104718066743	1.98506915172579
		SKCM	TCGA-EE-A3JE-06A-11D-A20D-08	331	0.13595166163142	1.64675248169689
		SKCM	TCGA-EE-A3JH-06A-11D-A21A-08	215	0.148837209302326	1.73107893728137
		SKCM	TCGA-EE-A3JI-06A-11D-A21A-08	1275	0.15843137254902	1.98680650756157
		READ	TCGA-EI-6507-01A-11D-1733-10	663	0.0165912518853695	0.322031596420726
		READ	TCGA-EI-6512-01A-11D-1733-10	106	0.0188679245283019	0.414737662056995
		READ	TCGA-EI-6513-01A-21D-1733-10	112	0.0357142857142857	0.710978849240563
		READ	TCGA-EI-6882-01A-11D-1924-10	1096	0.00821167883211679	0.302646402041591
		READ	TCGA-EI-6917-01A-11D-1924-10	4331	0.0510274763334103	2.6696220382892
		READ	TCGA-EI-7002-01A-11D-1924-10	133	0.0451127819548872	0.746527791702591
		PRAD	TCGA-EJ-5519-01A-01D-1576-08	114	0.140350877192982	1.89594359797483
		PRAD	TCGA-EJ-7782-01A-11D-2114-08	388	0.0180412371134021	0.5123229943057
		CESC	TCGA-EK-A2GZ-01A-11D-A17W-09	144	0.104166666666667	2.66617068465211
		CESC	TCGA-EK-A2H0-01A-11D-A17W-09	256	0.4296875	16.1015798210363
		CESC	TCGA-EK-A2IP-01A-11D-A17W-09	200	0.49	22.1696132081376
		CESC	TCGA-EK-A2PG-01A-11D-A18J-09	772	0.503886010362694	25.4736237695007
		CESC	TCGA-EK-A2PI-01A-11D-A18J-09	143	0.216783216783217	5.93393885712316
		CESC	TCGA-EK-A2PL-01A-11D-A18J-09	271	0.494464944649447	25.6499292533711
		CESC	TCGA-EK-A2PM-01A-11D-A18J-09	415	0.306024096385542	8.10333585865206
		CESC	TCGA-EK-A2R7-01A-11D-A18J-09	190	0.363157894736842	24.5287702987994
		CESC	TCGA-EK-A2R8-01A-21D-A18J-09	412	0.587378640776699	31.6946887003556
		CESC	TCGA-EK-A2R9-01A-11D-A18J-09	175	0.12	3.26605908869884
		CESC	TCGA-EK-A2RA-01A-11D-A18J-09	310	0.374193548387097	11.1022081842949
		CESC	TCGA-EK-A2RB-01A-11D-A18J-09	189	0.211640211640212	9.95370388936788
		CESC	TCGA-EK-A2RC-01A-11D-A18J-09	264	0.5	18.2484571305078
		CESC	TCGA-EK-A2RD-01A-12D-A20U-09	286	0.594405594405594	38.4574922998305
[truncated: 1,001 more rows]
